# Supplementary material for: Do social interactions explain ethnic differences in psychological distress and the protective effect of local ethnic density? A cross-sectional study of 226 487 adults in Australia
Source: PubMed Central journal article supplement — BMJ Open. 2013 May 2;3(5):e002713. doi: 10.1136/bmjopen-2013-002713 (PMC3646175; doi:10.1136/bmjopen-2013-002713), 2013-05-02
Supplement: bmjopen-2013-002713.draft_revisions.pdf [file bmjopen-2013-002713.draft_revisions.pdf]

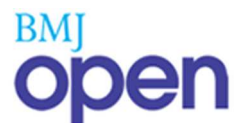

**Do social interactions explain ethnic differences in psychological distress and the protective effect of local ethnic density? Evidence from a cross-sectional study of 226,487 adults in middle-to-older age**

|                                 |                                                                                                                                                                                                                                                            |
|---------------------------------|------------------------------------------------------------------------------------------------------------------------------------------------------------------------------------------------------------------------------------------------------------|
| Journal:                        | <i>BMJ Open</i>                                                                                                                                                                                                                                            |
| Manuscript ID:                  | bmjopen-2013-002713                                                                                                                                                                                                                                        |
| Article Type:                   | Research                                                                                                                                                                                                                                                   |
| Date Submitted by the Author:   | 11-Feb-2013                                                                                                                                                                                                                                                |
| Complete List of Authors:       | Feng, Xiaoqi; University of Western Sydney, Centre for Health Research, School of Medicine<br>Astell-Burt, Thomas; University of Western Sydney, School of Science and Health<br>Kolt, Gregory; University of Western Sydney, School of Science and Health |
| <b>Primary Subject Heading</b>: | Epidemiology                                                                                                                                                                                                                                               |
| Secondary Subject Heading:      | Epidemiology, Public health, Sociology                                                                                                                                                                                                                     |
| Keywords:                       | MENTAL HEALTH, EPIDEMIOLOGY, PUBLIC HEALTH, SOCIAL MEDICINE                                                                                                                                                                                                |
|                                 |                                                                                                                                                                                                                                                            |

SCHOLARONE™  
Manuscripts

1  
2  
3 **Do social interactions explain ethnic differences in psychological distress and the protective effect**  
4 **of local ethnic density? Evidence from a cross-sectional study of 226,487 adults in middle-to-older**  
5 **age**  
6  
7

8  
9 **Xiaoqi Feng, PhD\* <sup>1</sup>**

10  
11 **Thomas Astell-Burt, PhD\* <sup>2,3</sup>**

12  
13 **Gregory S. Kolt, PhD <sup>2</sup>**  
14

15  
16  
17 \*Corresponding Author, Centre of Health Research, School of Medicine, University of Western  
18 Sydney, Locked Bag 1797, Penrith, NSW 2751, Australia. +61 2 4620 3951. X.Feng@uws.edu.au  
19

20 1 Centre of Health Research, School of Medicine, University of Western Sydney, Australia

21 2 School of Science and Health, University of Western Sydney, Australia

22 3 School of Geography and Geosciences, University of St Andrews, UK  
23

24  
25 **KEYWORDS**  
26

27 MENTAL HEALTH; ETHNICITY; MULTILEVEL MODELLING; PUBLIC HEALTH; SOCIAL EPIDEMIOLOGY  
28  
29

30  
31 **WORD COUNT: 2721**  
32

33  
34  
35  
36 "The Corresponding Author has the right to grant on behalf of all authors and does grant on behalf of all authors,  
37 an exclusive licence (or non-exclusive for government employees) on a worldwide basis to the BMJ Group and  
38 co-owners or contracting owning societies (where published by the BMJ Group on their behalf), and its Licensees  
39 to permit this article (if accepted) to be published in Journal of Epidemiology and Community Health and any  
40 other BMJ Group products and to exploit all subsidiary rights, as set out in our licence."  
41  
42  
43  
44  
45  
46  
47  
48  
49  
50  
51  
52  
53  
54  
55  
56  
57  
58  
59  
60

1  
2  
3 **Do social interactions explain ethnic differences in psychological distress and the protective effect**  
4 **of local ethnic density? Evidence from a cross-sectional study of 226,487 adults in middle-to-older**  
5 **age**  
6  
7  
8

9  
10 **ABSTRACT**

11 **Background:** A frequently proposed, but under-researched hypothesis is that ethnic density benefits  
12 mental health through increasing social interactions. We examined this hypothesis in 226,487 adults  
13 from 19 ethnic groups aged 45 years and older in Australia.  
14

15 **Methods:** Multilevel logit regression was used to measure association with scores of 22+ on the  
16 Kessler scale of psychological distress. Self-reported ancestry was used as a proxy for ethnicity.  
17 Measures of social interactions included the number of times in the last week were: *i*) spent with  
18 friends or family participants did not live with; *ii*) talked to someone on the telephone; *iii*) attended  
19 meetings of social groups; and *iv*) how many people could be relied upon outside their home, but  
20 within one hour of travel. Own-group ethnic density was measured as a percentage for Census  
21 Collection Districts.  
22  
23

24 **Results:** Psychological distress was reported by 11% of Australians born in Australia. The risk of  
25 experiencing psychological distress varied among ethnic minorities and by country of birth (e.g. 33%  
26 for the Lebanese born in Lebanon, compared to 4% for the Swiss born in Switzerland). These  
27 differences remained after full adjustment. Social interactions varied between ethnic groups and  
28 were associated with lower psychological distress and ethnic density. Ethnic density was associated  
29 with reduced psychological distress for some groups. This association, however, was explained by  
30 individual and neighbourhood characteristics and not by social interactions.  
31  
32

33 **Conclusion:** Social interactions are important correlates of mental health, but do not explain ethnic  
34 differences of psychological distress, nor the protective effect of own-group density.  
35  
36  
37  
38  
39

40  
41 **WHAT IS ALREADY KNOWN ON THIS SUBJECT?**

42 Ethnic differences in mental health, and the reportedly protective influence of own group ethnic  
43 density, are largely unexplained in previous studies. Social interactions are widely hypothesised as a  
44 mechanism linking ethnic density with more favourable mental health, and may also explain ethnic  
45 differences more generally. However, few studies have empirically tested these hypotheses.  
46  
47

48  
49 **WHAT THIS STUDY ADDS?**

50 In a large cohort of Australian adults in middle-to-older age, ethnic differences in mental health were  
51 not explained by four measures of social interactions. Protective associations between ethnic  
52 density and mental health were largely explained by individual-level socioeconomic characteristics,  
53 not social interactions.  
54  
55  
56  
57  
58  
59  
60

1  
2  
3 **Do social interactions explain ethnic differences in psychological distress and the protective effect**  
4 **of local ethnic density? Evidence from a cross-sectional study of 226,487 adults in middle-to-older**  
5 **age**  
6  
7  
8

9  
10 **SUMMARY**

11 **Article Focus:**

- 12  
13  
14
  - Ethnic differences in mental health, and the reportedly protective influence of own group ethnic density, are largely unexplained in previous studies.
  - Social interactions are widely hypothesised as a mechanism linking ethnic density with more favourable mental health, and may also explain ethnic differences more generally. However, few studies have empirically tested these hypotheses.
  - We examined this hypothesis in 226,713 adults from 19 ethnic groups aged 45 years and older in Australia.

15  
16  
17  
18  
19  
20  
21  
22  
23

24  
25 **Key Messages:**

- 26  
27
  - Ethnic differences in mental health persisted after full adjustment; they were not explained by four measures of social interactions, or other individual and neighbourhood characteristics.
  - Protective associations between ethnic density and mental health were largely explained by individual-level socioeconomic characteristics, not social interactions.

28  
29  
30  
31  
32  
33  
34  
35

36 **Strengths and Limitations:**

- 37  
38
  - Large samples allowed for stratification of ethnic groups to investigate differences in mental health, social interactions and ethnic density by country of birth
  - The use of a very small geographical scale than in previous work allowed for the ascertainment of local 'pockets' of ethnic density, which would otherwise have been hidden if the study had been dependent upon larger spatial units
  - Some of the remaining ethnic inequalities in mental health could be explained by systematic differences in the experience of racial discrimination which we were unable to control for

39  
40  
41  
42  
43  
44  
45  
46  
47  
48  
49  
50  
51  
52  
53  
54  
55  
56  
57  
58  
59  
60

## INTRODUCTION

It has been suggested that living in areas of higher own group ethnic density reduces the risk of psychological distress, with increased social support hypothesised to be one of the primary drivers [1, 2]. Only two studies, however, have been identified that have examined this proposition, one in the UK and another in the US, with equivocal results [3, 4]. More broadly, studies of ethnic density and mental health have been mostly based upon adolescents and adults of child-bearing age in European and North American datasets [3-11]. Few studies have been conducted on adults in middle to older age, and no research has been conducted in Australia, which is surprising when one considers that, of the 22.6 million population, over one quarter were born outside Australia [12] and 50% of whom originated from non-English-speaking countries [13].

Australian cities are some of the most ethnically diverse in the world [14] and often contain substantial residential clustering of ethnic groups [15-17]. Contrasting migration histories and residential patterns of ethnic groups means that one cannot assume association between ethnic density and mental health reported in Europe and North America generalises to the Australian context. Therefore, more research is required not only to further understand the mechanisms underlying ethnic density effects, but also to identify the extent that ethnic density may be beneficial to mental health in other ethnically diverse countries like Australia. In this paper we attempt to achieve both through analysis of a large number of ethnic groups and four measures of social interactions in an Australian cohort of adults.

## METHOD

### Study population

The 45 and Up study [18] is a large scale cohort of 266,848 residents aged 45 and over in NSW (the most populous state in Australia). A baseline questionnaire including a range of health and social issues was distributed to a random sample of adults listed in the Medicare Australia database between 2006 and 2009. Response to the questionnaire was 18%. The University of New South Wales Human Research Ethics Committee approved The 45 and Up Study. Further details including the baseline questionnaire are available to download from [www.45andUp.org.au](http://www.45andUp.org.au)

Ethnicity status was derived from first responses to a question on self-reported ancestry (*'What is your ancestry?'*). Secondary responses to this question were not used in the definition of ethnicity. We focused on the 19 largest groups: Australian, English, Scottish, Welsh, Irish, Danish, French, Swiss, German, Dutch, Spanish, Italian, Greek, Polish, Maltese, Lebanese, Croatian, Indian, and Chinese. Large sample sizes allowed for stratification of each group by country of birth (assessed by the question *'in which country were you born?'*) to address healthy-migrant effects. We retained all participants born in Australia (n=179,712), all participants of Australian ethnicity born outside Australia (n=1,336), and participants of non-Australian ethnic groups born in their ethnic-country of origin (n=33,739). Participants of non-Australian ethnic groups born elsewhere (i.e. not Australia or their ethnic-country of origin) were omitted from the sample (n=33,574) for substantive and practical reasons. Non-Australian ethnic groups born overseas and not in the ethnic-country of

1  
2  
3 origin were heterogeneous by definition, which made it difficult to meaningfully interpret any results  
4 for to these participants. Furthermore, in practical terms, the sample sizes of many of these groups  
5 were small, which also reduced the potential to draw reliable statistical inference. We also omitted  
6 all participants missing a postcode identifier (n=263) and those missing a valid outcome measure  
7 (n=7,011). Missing data for independent variables was resolved via imputation, retaining an overall  
8 sample size of n=226,487.  
9  
10

### 11 12 13 **Psychological distress**

14  
15 We used the Kessler Psychological Distress Scale (K10) to evaluate mental health status [19, 20]. The  
16 K10 measures symptoms of psychological distress experienced over the past four weeks, including  
17 feeling tired for no reason, nervous, hopeless, restless, depressed, sad and worthless. Participants  
18 had five choices for each of the ten questions (none of the time =1, a little of the time =2, some of  
19 the time =3, most of the time =4, all of the time=5) and these were summed to give the overall score.  
20 We constructed a binary variable wherein a score of 22 or more identified participants with a high  
21 risk of psychological distress [21]. The K10 has been used in this binary manner, with 22 as the cut-  
22 point, in previous published analyses of The 45 and Up Study [22-24].  
23  
24  
25  
26  
27

### 28 **Other individual-level measures**

29  
30 Social interactions were measured using four questions from the shortened version of the Duke  
31 Social Support Index [25]. Three of the questions tested the number of times in the past week a  
32 participant: i) spent time with friends or family they did not live with; ii) talked to someone (friends,  
33 relatives or others) on the telephone; iii) attended meetings at social clubs or religious groups. The  
34 final question asked participants how many people outside their home, but within one hour travel-  
35 time, did they feel close to or could rely on. Previous work has constructed a composite indicator of  
36 social support from responses to these questions [26, 27], though we analysed each one separately  
37 in line with recent studies which have demonstrated that some are more important than others [28].  
38  
39

40  
41 We also accounted for other individual-level variables (self-reported) which are known to correlate  
42 with mental health. These included: age, gender, physical activity, smoking status, Body Mass Index  
43 (BMI), highest educational qualifications, economic status, annual household income, couple status,  
44 and whether language(s) other than English were spoken at home.  
45  
46  
47  
48

### 49 **Neighbourhood-level measures**

50  
51 This study used Census Collection Districts (CCD) to define neighbourhoods. With a mean of 225  
52 residents [29], CCDs were the smallest geographical scale for which 2006 Census data was made  
53 available [30]. However, 9% of participants in The 45 and Up Study were missing a valid CCD. As  
54 nearly 100% had a postcode identifier, we assigned those missing a CCD with a pseudo-CCD  
55 according to the location of the population-weighted postcode centroid. Therefore, 100% of the  
56  
57  
58  
59  
60

1  
2  
3 sample could be assigned neighbourhood measures and clustering within regression models could  
4 be operationalized at the CCD level.  
5

6 We constructed the measure of own-group ethnic density from 2006 Census data. The number of  
7 people within a CCD pertaining to each participant's ethnic group was divided the total usual  
8 resident population. For example, Chinese participants (regardless of their country of birth) were  
9 assigned the percentage of the population in their CCD who self-identified as Chinese.  
10

11 Other neighbourhood measures included local affluence and geographical remoteness. We used the  
12 Socio-Economic Index for Areas (SEIFA) 'Index of Relative Socio-Economic Advantage/Disadvantage'  
13 [31] to measure local affluence. This variable was expressed in percentiles; higher percentiles  
14 indicate more affluent areas. Geographical remoteness was measured using the  
15 'Accessibility/Remoteness Index of Australia' (ARIA) [32]. ARIA is a score ranging from 0 to 15, with  
16 scores of 2.4 and over used to distinguish between urban and inner regions (<2.4) and rural or  
17 remote ( $\geq 2.4$ ).  
18  
19  
20  
21

## 22 23 24 **Statistical analysis**

25 The study population was first assessed using descriptive statistics. Measures of ethnic density were  
26 mapped across NSW. To investigate ethnic differences in psychological distress, multilevel logistic  
27 regression was used to account for the clustering of participants within CCDs [33]. The sample was  
28 clustered within 11,621 CCDs (20 participants per CCD on average). CCDs accounted for 3.3% of the  
29 variation in psychological distress within a 'null' two-level multilevel model. A categorical variable  
30 identifying ethnic groups stratified by country of birth was fitted in this model, which was then  
31 adjusted for age and gender. We proceeded to test whether any ethnic differences in psychological  
32 distress remained significant after controlling for social interactions, other individual-level variables,  
33 local affluence and geographical remoteness. Multilevel logit regression was fitted to ethnic and  
34 country of birth-specific groups to investigate association between psychological distress and own-  
35 group ethnic density. To assess whether these associations could be explained by social interactions,  
36 we first tested the extent of correlation between each measure and own-group ethnic density using  
37 negative-binomial regression (to account for the skewed distribution of the social interaction  
38 variables). Social interactions were then fitted into the logit models, followed by individual-level  
39 variables, local affluence and geographical remoteness. Interaction terms were fitted to test for  
40 potential synergistic effects between ethnic density and other neighbourhood variables. Statistically  
41 significant associations were identified using the log-likelihood ratio test ( $p < 0.05$ ). All analyses  
42 were conducted in STATA 12.  
43  
44  
45  
46  
47  
48  
49  
50

## 51 **RESULTS**

52 Figure 1 reports differences in the age- and gender-adjusted prevalence of psychological distress by  
53 ethnicity and country of birth. The rate of high psychological distress was 11% for Australians born in  
54 Australia. In comparison, this risk was far higher for some groups, for example, 33% for the Lebanese  
55 born in Lebanon, but much lower for others, such as the Swiss born in Switzerland at 4%. There was  
56 no consistent effect of migrant status on the risk of psychological distress. For example, the  
57  
58  
59  
60

prevalence of psychological distress among Croatians born in Croatia was 14.3% higher than their Australian born Croatian peers. In contrast, no substantive difference in the prevalence of psychological distress was reported among the Chinese, whether born in Australia (12.8%) or China (12.9%), and the Danish born in Australia had twice the risk of their Danish born contemporaries (10% to 5% respectively).

<Figure 1 here>

Table 1 reports the percentage of each ethnic and country of birth group within the lowest quartile of the four social interactions measures. Compared to their Australian-born peers, those born within their ethnic country of origin tended to be more prevalent in the lowest quartile of every measure of social interactions. For the variable denoting how many people a person felt they could rely on, within group differences were notably wide between the Australian-born and those born in the ethnic country of origin for the French (34.1%, 52%), Polish (37.8%, 51%), Lebanese (26.2%, 45.7%) and Chinese (32.8%, 56.7%).

**Table 1: Ethnic and country of birth differences in social interactions; percentage in the lowest quartile for each measure of social interactions**

| Ethnic group, country of birth | N (%)         | Social interactions                                  |                                       |                                          |                                 |
|--------------------------------|---------------|------------------------------------------------------|---------------------------------------|------------------------------------------|---------------------------------|
|                                |               | <i>Less likely to spend time with friends/family</i> | <i>Less likely to talk to someone</i> | <i>Less likely to go to social clubs</i> | <i>Few people can depend on</i> |
| Australia, Australia           | 61,848 (27.3) | 35.9 (35.51, 36.30)                                  | 26.1 (25.72, 26.45)                   | 42.1 (41.68, 42.51)                      | 30.5 (30.10, 30.88)             |
| Australian, Not Australia      | 1,383 (0.6)   | 37.9 (35.37, 40.54)                                  | 30.2 (27.85, 32.73)***                | 37.9 (35.37, 40.59)***                   | 36.7 (34.15, 39.28)***          |
| English, Australia             | 50,480 (22.3) | 35.6 (35.16, 36.03)                                  | 25.5 (25.06, 25.86)*                  | 41.3 (40.89, 41.80)*                     | 30.1 (29.64, 30.49)             |
| English, UK                    | 16,356 (7.2)  | 41.4 (40.66, 42.21)***                               | 28.5 (27.82, 29.24)***                | 43.9 (43.15, 44.73)***                   | 37.9 (37.17, 38.71)***          |
| Scottish, Australia            | 21,745 (9.6)  | 35.1 (34.47, 35.78)*                                 | 24.6 (24.06, 25.24)***                | 40.5 (39.86, 41.21)***                   | 29.2 (28.57, 29.81)***          |
| Scottish, UK                   | 3,759 (1.7)   | 37.8 (36.28, 39.43)*                                 | 27.8 (26.32, 29.23)*                  | 42.9 (41.28, 44.53)                      | 35.8 (34.26, 37.37)***          |
| Welsh, Australia               | 1,265 (0.6)   | 36.6 (33.99, 39.38)                                  | 25.0 (22.67, 27.51)                   | 40.3 (37.58, 43.11)                      | 30.0 (27.48, 32.58)             |
| Welsh, UK                      | 835 (0.4)     | 42.4 (39.06, 45.87)***                               | 28.9 (25.89, 32.12)                   | 44.6 (41.14, 48.05)                      | 38.0 (34.68, 41.35)***          |
| Irish, Australia               | 33,360 (14.7) | 35.0 (34.52, 35.58)**                                | 24.1 (23.58, 24.53)***                | 39.7 (39.20, 40.30)***                   | 30.4 (29.91, 30.94)             |
| Irish, Ireland                 | 1,048 (0.5)   | 40.9 (37.89, 43.92)***                               | 27.5 (24.90, 30.34)                   | 36.7 (33.71, 39.69)***                   | 36.3 (33.37, 39.25)***          |
| Danish, Australia              | 695 (0.3)     | 36.4 (32.84, 40.09)                                  | 24.7 (21.58, 28.11)                   | 37.7 (34.11, 41.46)*                     | 30.2 (26.88, 33.74)             |
| Danish, Denmark                | 178 (0.1)     | 49.0 (41.63, 56.43)***                               | 34.2 (27.55, 41.57)*                  | 55.3 (47.76, 62.56)***                   | 42.3 (35.15, 49.78)***          |
| French, Australia              | 1,195 (0.5)   | 37.9 (35.18, 40.77)                                  | 26.3 (23.78, 28.92)                   | 44.1 (41.20, 46.95)                      | 34.1 (31.46, 36.87)**           |
| French, France                 | 237 (0.1)     | 47.1 (40.76, 53.58)***                               | 29.9 (24.30, 36.10)                   | 53.4 (46.92, 59.85)***                   | 52.0 (45.51, 58.36)***          |
| Swiss, Australia               | 163 (0.1)     | 40.9 (33.48, 48.67)                                  | 23.5 (17.62, 30.70)                   | 49.7 (41.86, 57.48)                      | 34.5 (27.59, 42.20)             |
| Swiss, Switzerland             | 224 (0.1)     | 49.6 (43.01, 56.23)***                               | 35.8 (29.66, 42.36)***                | 51.1 (44.46, 57.77)***                   | 45.1 (38.62, 51.76)***          |
| German, Australia              | 9,894 (4.4)   | 36.1 (35.18, 37.11)                                  | 26.4 (25.49, 27.27)                   | 41.4 (40.41, 42.41)                      | 31.0 (30.12, 31.97)             |
| German, Germany                | 2,073 (0.9)   | 48.0 (45.82, 50.19)***                               | 35.4 (33.33, 37.54)***                | 50.6 (48.38, 52.79)***                   | 45.8 (43.63, 47.99)***          |
| Dutch, Australia               | 1,487 (0.7)   | 35.0 (32.61, 37.43)                                  | 27.8 (25.57, 30.11)                   | 41.6 (39.09, 44.15)                      | 31.2 (28.93, 33.65)             |
| Dutch, Netherlands             | 2,451 (1.1)   | 40.8 (38.88, 42.85)***                               | 30.7 (28.87, 32.57)***                | 42.4 (40.39, 44.43)                      | 37.7 (35.78, 39.68)***          |
| Spanish, Australia             | 316 (0.1)     | 40.8 (35.42, 46.36)                                  | 28.6 (23.72, 33.93)                   | 46.6 (41.05, 52.22)                      | 30.0 (25.15, 35.25)             |
| Spanish, Spain                 | 158 (0.1)     | 45.5 (37.82, 53.48)*                                 | 31.4 (24.55, 39.12)                   | 53.9 (45.89, 61.72)**                    | 47.3 (39.57, 55.25)***          |
| Italian, Australia             | 3,259 (1.4)   | 35.5 (33.88, 37.18)                                  | 25.8 (24.33, 27.34)                   | 41.2 (39.49, 42.93)                      | 32.0 (30.42, 33.66)             |
| Italian, Italy                 | 1,922 (0.9)   | 37.4 (35.21, 39.62)                                  | 29.5 (27.48, 31.58)***                | 48.1 (45.84, 50.43)***                   | 36.5 (34.36, 38.75)***          |
| Greek, Australia               | 1,072 (0.5)   | 34.1 (31.36, 37.03)                                  | 21.2 (18.92, 23.75)***                | 44.0 (40.98, 47.03)                      | 30.1 (27.44, 32.96)             |



1  
2  
3  
4  
5  
6  
7  
8  
9  
10  
11  
12  
13  
14  
15  
16  
17  
18  
19  
20  
21  
22  
23  
24  
25  
26  
27  
28  
29  
30  
31  
32  
33  
34  
35  
36  
37  
38  
39  
40  
41  
42  
43  
44  
45  
46  
47  
48  
49  
50  
51  
52  
53  
54  
55  
56  
57  
58  
59  
60

|                     |             |                        |                        |                        |                        |
|---------------------|-------------|------------------------|------------------------|------------------------|------------------------|
| Greek, Greece       | 696 (0.3)   | 38.6 (35.02, 42.39)    | 30.5 (27.14, 34.09)**  | 45.8 (42.01, 49.61)    | 44.4 (40.63, 48.14)*** |
| Polish, Australia   | 1,111 (0.5) | 39.0 (36.14, 41.91)*   | 28.7 (26.05, 31.41)    | 41.8 (38.86, 44.72)    | 37.8 (34.94, 40.70)*** |
| Polish, Poland      | 471 (0.2)   | 47.5 (42.98, 52.12)*** | 38.7 (34.31, 43.27)*** | 46.4 (41.80, 51.06)    | 51.0 (46.37, 55.52)*** |
| Maltese, Australia  | 675 (0.3)   | 35.0 (31.53, 38.66)    | 28.8 (25.49, 32.29)    | 41.1 (37.47, 44.93)    | 29.2 (25.94, 32.79)    |
| Maltese, Malta      | 715 (0.3)   | 38.7 (35.19, 42.43)    | 30.1 (26.78, 33.57)*   | 38.9 (35.29, 42.59)    | 38.9 (35.31, 42.57)*** |
| Lebanese, Australia | 461 (0.2)   | 34.0 (29.83, 38.49)    | 23.5 (19.81, 27.54)    | 37.5 (33.16, 42.06)*   | 26.2 (22.35, 30.39)*   |
| Lebanese, Lebanon   | 567 (0.3)   | 30.9 (27.24, 34.78)*   | 29.6 (25.99, 33.43)    | 41.4 (37.34, 45.56)    | 45.7 (41.56, 49.89)*** |
| Croatian, Australia | 218 (0.1)   | 37.3 (31.12, 43.93)    | 22.9 (17.83, 28.92)    | 44.9 (38.34, 51.74)    | 34.3 (28.32, 40.93)    |
| Croatian, Croatia   | 349 (0.2)   | 43.4 (38.20, 48.74)**  | 40.8 (35.63, 46.14)*** | 47.3 (42.00, 52.68)    | 48.0 (42.75, 53.36)*** |
| Indian, Australia   | 213 (0.1)   | 39.0 (32.60, 45.72)    | 20.8 (15.90, 26.69)    | 43.6 (36.97, 50.42)    | 32.3 (26.38, 38.90)    |
| Indian, India       | 668 (0.3)   | 47.7 (43.91, 51.61)*** | 26.3 (23.12, 29.66)    | 26.5 (23.29, 29.88)*** | 39.4 (35.66, 43.18)*** |
| Chinese, Australia  | 690 (0.3)   | 39.3 (35.68, 43.03)    | 28.7 (25.41, 32.24)    | 40.5 (36.80, 44.23)    | 32.8 (29.36, 36.41)    |
| Chinese, China      | 2,250 (1.0) | 53.5 (51.40, 55.62)*** | 40.5 (38.42, 42.57)*** | 42.5 (40.42, 44.59)    | 56.7 (54.62, 58.82)*** |

\*\*\* p &lt; 0.001; \*\* p &lt; 0.01; \* p &lt; 0.05

Table 2 reports results from multilevel logit regression. Model 1 reports ethnic and country of birth differences in psychological distress, adjusted for age and gender (sensu Figure 1). We adjusted this Model for each social interaction variable individually, and then simultaneously (Model 2). Higher quartiles of each social interaction variable were associated with a lower risk of psychological distress; especially that denoting the number of people that can be relied on (highest quartile odds ratio: 0.36, 95% confidence interval: 0.34, 0.38). However, social interactions only explained the higher risk of psychological distress experienced by the Chinese born in China. Adjusting for all other individual-level characteristics, neighbourhood affluence and geographical remoteness (Model 3) had a more substantive effect on the ethnic differences (e.g. OR=3.67 to 2.11 for the Lebanese born in Lebanon).

**Table 2: Ethnic and country of birth group differences in the risk of psychological distress, adjusted for social interactions variables and other individual and neighbourhood characteristics**

| Ethnicity, country of birth | Model 1                              | Model 2              | Model 3              |
|-----------------------------|--------------------------------------|----------------------|----------------------|
|                             | Odds Ratio (95% Confidence Interval) |                      |                      |
| Australian, Australia       | 1                                    | 1                    | 1                    |
| Australian, Not Australia   | 1.83 (1.59, 2.10)***                 | 1.73 (1.50, 1.99)*** | 1.57 (1.36, 1.82)*** |
| English, Australia          | 0.93 (0.90, 0.97)***                 | 0.94 (0.90, 0.98)*** | 0.96 (0.92, 1.00)*   |
| English, UK                 | 0.83 (0.78, 0.88)***                 | 0.75 (0.71, 0.80)*** | 0.82 (0.77, 0.87)*** |
| Scottish, Australia         | 0.89 (0.84, 0.93)***                 | 0.90 (0.86, 0.95)*** | 0.96 (0.91, 1.01)    |
| Scottish, UK                | 0.81 (0.72, 0.90)***                 | 0.76 (0.68, 0.85)*** | 0.82 (0.73, 0.92)*** |
| Welsh, Australia            | 1.10 (0.93, 1.31)                    | 1.12 (0.94, 1.33)    | 1.19 (1.00, 1.42)    |
| Welsh, UK                   | 0.82 (0.65, 1.04)                    | 0.75 (0.60, 0.95)*   | 0.84 (0.66, 1.07)    |
| Irish, Australia            | 0.95 (0.91, 0.99)*                   | 0.96 (0.92, 1.01)    | 0.99 (0.95, 1.04)    |
| Irish, Ireland              | 0.93 (0.76, 1.13)                    | 0.87 (0.71, 1.06)    | 0.92 (0.75, 1.12)    |
| Danish, Australia           | 0.90 (0.70, 1.15)                    | 0.91 (0.71, 1.17)    | 0.94 (0.73, 1.21)    |
| Danish, Denmark             | 0.43 (0.22, 0.84)*                   | 0.36 (0.18, 0.71)**  | 0.38 (0.19, 0.77)**  |
| French, Australia           | 1.04 (0.87, 1.24)                    | 1.01 (0.84, 1.21)    | 0.99 (0.83, 1.19)    |
| French, France              | 1.08 (0.73, 1.60)                    | 0.87 (0.58, 1.29)    | 1.00 (0.67, 1.51)    |
| Swiss, Australia            | 1.01 (0.62, 1.65)                    | 1.00 (0.61, 1.63)    | 1.14 (0.69, 1.88)    |
| Swiss, Switzerland          | 0.33 (0.17, 0.65)***                 | 0.27 (0.14, 0.53)*** | 0.33 (0.17, 0.65)*** |
| German, Australia           | 1.12 (1.05, 1.19)***                 | 1.11 (1.04, 1.19)*** | 1.10 (1.02, 1.17)**  |
| German, Germany             | 0.98 (0.86, 1.13)                    | 0.82 (0.71, 0.94)**  | 0.87 (0.75, 1.00)*   |
| Dutch, Australia            | 1.03 (0.88, 1.22)                    | 1.02 (0.87, 1.20)    | 1.07 (0.90, 1.27)    |
| Dutch, Netherlands          | 0.96 (0.85, 1.09)                    | 0.88 (0.78, 1.01)    | 0.91 (0.80, 1.04)    |
| Spanish, Australia          | 1.08 (0.77, 1.52)                    | 1.08 (0.76, 1.52)    | 0.92 (0.64, 1.33)    |
| Spanish, Spain              | 1.35 (0.87, 2.11)                    | 1.14 (0.73, 1.79)    | 1.06 (0.67, 1.67)    |

|    |                     |                      |                      |                      |
|----|---------------------|----------------------|----------------------|----------------------|
| 1  |                     |                      |                      |                      |
| 2  |                     |                      |                      |                      |
| 3  | Italian, Australia  | 1.05 (0.94, 1.18)    | 1.04 (0.93, 1.17)    | 1.07 (0.96, 1.21)    |
| 4  | Italian, Italy      | 1.79 (1.59, 2.02)*** | 1.68 (1.49, 1.89)*** | 1.46 (1.29, 1.65)**  |
| 5  | Greek, Australia    | 1.07 (0.88, 1.29)    | 1.08 (0.89, 1.30)    | 1.11 (0.91, 1.35)    |
| 6  | Greek, Greece       | 2.04 (1.69, 2.46)*** | 1.81 (1.50, 2.19)*** | 1.33 (1.10, 1.62)**  |
| 7  | Polish, Australia   | 1.17 (0.98, 1.40)    | 1.10 (0.92, 1.32)    | 1.15 (0.95, 1.39)    |
| 8  | Polish, Poland      | 1.89 (1.51, 2.37)*** | 1.54 (1.22, 1.94)*** | 1.64 (1.30, 2.08)*** |
| 9  | Maltese, Australia  | 1.26 (1.01, 1.57)*   | 1.27 (1.01, 1.59)*   | 1.11 (0.88, 1.41)    |
| 10 | Maltese, Malta      | 1.71 (1.41, 2.09)*** | 1.59 (1.30, 1.94)*** | 1.19 (0.97, 1.46)    |
| 11 | Lebanese, Australia | 1.13 (0.85, 1.50)    | 1.22 (0.92, 1.62)    | 1.31 (0.98, 1.75)    |
| 12 | Lebanese, Lebanon   | 3.97 (3.30, 4.76)*** | 3.67 (3.04, 4.42)*** | 2.11 (1.73, 2.57)*** |
| 13 | Croatian, Australia | 0.97 (0.63, 1.49)    | 0.94 (0.61, 1.46)    | 1.00 (0.64, 1.56)    |
| 14 | Croatian, Croatia   | 2.70 (2.11, 3.46)*** | 2.30 (1.78, 2.96)*** | 1.84 (1.42, 2.39)*** |
| 15 | Indian, Australia   | 1.86 (1.31, 2.63)*** | 1.88 (1.33, 2.68)*** | 1.64 (1.14, 2.35)**  |
| 16 | Indian, India       | 1.13 (0.89, 1.43)    | 1.07 (0.84, 1.36)    | 1.43 (1.12, 1.83)**  |
| 17 | Chinese, Australia  | 1.18 (0.94, 1.48)    | 1.16 (0.92, 1.45)    | 1.18 (0.93, 1.50)    |
| 18 | Chinese, China      | 1.19 (1.05, 1.35)**  | 0.90 (0.79, 1.02)    | 1.05 (0.92, 1.20)    |

Number of occasions spent with friends or family

|    |                               |  |                      |                      |
|----|-------------------------------|--|----------------------|----------------------|
| 19 | Quartile 1 (Low)              |  | 1                    | 1                    |
| 20 | Quartile 2 (Low to Moderate)  |  | 0.77 (0.74, 0.81)*** | 0.78 (0.75, 0.82)*** |
| 21 | Quartile 3 (Moderate to High) |  | 0.80 (0.77, 0.83)*** | 0.78 (0.75, 0.81)*** |
| 22 | Quartile 4 (High)             |  | 1.00 (0.97, 1.04)    | 0.89 (0.85, 0.92)*** |

Number of telephone conversations

|    |                               |  |                      |                      |
|----|-------------------------------|--|----------------------|----------------------|
| 23 | Quartile 1 (Low)              |  | 1                    | 1                    |
| 24 | Quartile 2 (Low to Moderate)  |  | 0.77 (0.74, 0.80)*** | 0.82 (0.79, 0.85)*** |
| 25 | Quartile 3 (Moderate to High) |  | 0.79 (0.76, 0.82)*** | 0.83 (0.80, 0.87)*** |
| 26 | Quartile 4 (High)             |  | 0.78 (0.75, 0.81)*** | 0.85 (0.82, 0.88)*** |

Number of visits to social clubs

|    |                               |  |                      |                      |
|----|-------------------------------|--|----------------------|----------------------|
| 27 | Quartile 1 (Low)              |  | 1                    | 1                    |
| 28 | Quartile 2 (Low to Moderate)  |  | 0.75 (0.72, 0.78)*** | 0.86 (0.83, 0.90)*** |
| 29 | Quartile 3 (Moderate to High) |  | 0.77 (0.74, 0.80)*** | 0.88 (0.84, 0.91)*** |
| 30 | Quartile 4 (High)             |  | 0.95 (0.92, 0.98)**  | 1.01 (0.97, 1.04)    |

Number of people that can be relied on

|    |                               |  |                      |                      |
|----|-------------------------------|--|----------------------|----------------------|
| 31 | Quartile 1 (Low)              |  | 1                    | 1                    |
| 32 | Quartile 2 (Low to Moderate)  |  | 0.58 (0.56, 0.61)*** | 0.66 (0.63, 0.68)*** |
| 33 | Quartile 3 (Moderate to High) |  | 0.48 (0.47, 0.50)*** | 0.56 (0.54, 0.58)*** |
| 34 | Quartile 4 (High)             |  | 0.36 (0.34, 0.38)*** | 0.44 (0.42, 0.46)*** |

\* p < 0.05; \*\* p < 0.01; \*\*\* p < 0.001

Model 1: Multilevel logit regression, adjusted for age and gender

Model 2: Model 1 + social interactions

Model 3: Model 2 + other individual-level variables, neighbourhood affluence and geographical remoteness

Figure 2 illustrates the ethnic and country of birth group differences in own-group ethnic density. Regardless of whether participants were born in Australia or the UK, those identifying as Australian (32.6%) or English (35.1%) ethnicities lived in the most ethnically dense neighbourhoods. Compared to the Australians and the English, the clustering of other ethnic groups in NSW was much lower. The highest mean ethnic density for non-Australian and non-English groups was for the Chinese born in China at 14.9%, whereas the lowest was for Australian born Swiss at 0.1%. There was evidence of heterogeneity of mean ethnic density within some groups. For example, Italians born in Australia had a mean of ethnic density of 4.9% but Italian-born Italians had 7.7%. Similar patterns were observed for Greeks, the Chinese and the Lebanese.

<Figure 2 here>

For the next stage of analysis we investigated the level of association between psychological distress and own-group ethnic density. This necessitated stratification of the sample by ethnic and country of birth group to match each individual with the relevant ethnic density measure. For example, Chinese ethnic density was matched to Chinese individuals (irrespective of whether they were born in China or Australia). We conducted these analyses for all groups, but due to space constraints, we focus our report on groups that have a mean ethnic density of 2% or more: Australians, English, Scottish, Irish, German, Italian, Greek, Lebanese, and Chinese.

Table 3 reports the results of these ethnic and county of birth group specific models. Model 1 adjusted ethnic density for age and gender. Ethnic density appeared protective against psychological distress for the English born in UK, and Australian-born Scottish, Irish and Chinese. Unexpectedly, increasing ethnic density was associated with a higher risk of psychological distress among Australians born in Australia. This model was adjusted by the social interactions variables (Model 2), but the associations between ethnic density and psychological distress persisted. Further adjustment for other individual-level variables, local affluence and geographical remoteness (Model 3) had a much more substantive effect, with all ethnic density effects explained, except that for the English born in the UK and the overseas-born Australians. We did not find any evidence of interactions between ethnic density and any other independent variables in our models.

**Table 3: Association between own-group ethnic density and psychological distress by ethnic group, adjusting for social interactions and other individual and neighbourhood characteristics: Odds Ratios (95% Confidence Intervals)**

|                           | Model 1              | Model 2              | Model 3             |
|---------------------------|----------------------|----------------------|---------------------|
|                           | OR (95% CI)          |                      |                     |
| Australian, Australia     | 1.01 (1.01, 1.01)*** | 1.01 (1.01, 1.01)*** | 1.00 (1.00, 1.00)   |
| Australian, not Australia | 0.97 (0.96, 0.99)*** | 0.98 (0.96, 0.99)**  | 0.97 (0.95, 0.99)** |
| English, Australia        | 1.00 (1.00, 1.00)    | 1.00 (1.00, 1.00)    | 1.00 (0.99, 1.00)   |
| English, UK               | 0.99 (0.99, 1.00)*   | 0.99 (0.99, 1.00)*   | 0.99 (0.99, 1.00)*  |
| Scottish, Australia       | 0.97 (0.94, 1.00)*   | 0.98 (0.95, 1.01)    | 0.99 (0.96, 1.01)   |
| Scottish, UK              | 0.98 (0.91, 1.06)    | 0.99 (0.92, 1.07)    | 1.00 (0.93, 1.08)   |
| Irish, Australia          | 0.98 (0.96, 0.99)**  | 0.98 (0.97, 1.00)**  | 1.00 (0.98, 1.01)   |
| Irish, Ireland            | 0.94 (0.86, 1.03)    | 0.95 (0.86, 1.04)    | 0.97 (0.87, 1.07)   |
| German, Australia         | 0.99 (0.95, 1.03)    | 0.99 (0.95, 1.04)    | 1.00 (0.96, 1.04)   |
| German, Germany           | 1.00 (0.90, 1.11)    | 1.00 (0.90, 1.12)    | 1.00 (0.89, 1.12)   |
| Italian, Australia        | 0.99 (0.97, 1.01)    | 0.99 (0.98, 1.01)    | 1.01 (0.99, 1.03)   |
| Italian, Italy            | 1.00 (0.98, 1.01)    | 1.00 (0.99, 1.02)    | 1.00 (0.99, 1.02)   |
| Greek, Australia          | 0.98 (0.94, 1.02)    | 0.99 (0.95, 1.04)    | 1.01 (0.96, 1.05)   |
| Greek, Greece             | 1.01 (0.99, 1.03)    | 1.01 (0.99, 1.03)    | 1.01 (0.98, 1.03)   |
| Lebanese, Australia       | 1.01 (0.95, 1.07)    | 1.04 (0.98, 1.10)    | 0.98 (0.91, 1.06)   |

|                    |                    |                    |                   |
|--------------------|--------------------|--------------------|-------------------|
| Lebanese, Lebanon  | 1.02 (1.00, 1.05)  | 1.02 (1.00, 1.05)  | 1.01 (0.98, 1.04) |
| Chinese, Australia | 0.90 (0.81, 0.99)* | 0.86 (0.76, 0.97)* | 0.88 (0.70, 1.12) |
| Chinese, China     | 1.00 (0.99, 1.01)  | 1.00 (0.99, 1.01)  | 1.00 (0.99, 1.01) |

\*\*\* p < 0.05; \*\* p < 0.01; \* p < 0.05

Model 1: Adjusted for age and gender

Model 2: Model 1 + social interactions

Model 3: Model 2 + individual characteristics, neighbourhood affluence and geographical remoteness

## DISCUSSION

This paper examined the relationship between ethnic density and psychological distress in one of the most ethnic diverse areas of Australia. We found substantive heterogeneity in the risk of psychological distress between and within ethnic groups. Ethnic differences in social interactions, individual and neighbourhood characteristics did not explain the ethnic differences in the risk of psychological distress. More social interactions were associated with lower risk of psychological distress, especially the number of people study participants felt they could rely on. Increasing own-group ethnic density was associated with less psychological distress for some ethnic groups, but not all. Social interactions were often more common in ethnically dense neighbourhoods. However, individual and neighbourhood characteristics, not social interactions, explained the ethnic density effects on psychological distress. Only the English born in the UK and the overseas-born Australians appeared to benefit from ethnic density after controlling for all other characteristics.

Although there are many studies on ethnic density and mental health [1-11], only two others have tested whether this relationship is explained by social interactions. A UK study [3] found a lower risk of common mental disorders for the Irish and for the Bangladeshi groups they studied in more ethnically dense neighbourhoods. This was not fully explained by measures of practical and emotional social support. Contrary to the ethnic density hypothesis, this study also reported significantly higher risk of common mental disorders among white British in ethnically dense neighbourhoods. A study in the US [4] also showed the benefits of living in a higher own-ethnic group density neighbourhoods for the emotional well-being of Black and Hispanic groups. Measures of personal and neighbourhood social support partially explained the relationship for Blacks but not among Hispanics. Therefore, despite using contrasting measures of mental health and social interactions for different ethnic groups in the UK, US and Australia, our findings are consistent wherein social interactions only played a weak role in explaining the ethnic density effect on mental health.

A particular strength of our study includes the large sample sizes for many different ethnic groups; more than has been possible to analyse in previous studies [1]. This allowed stratification by country of birth, which afforded new insights into the heterogeneity of mental health, social interactions and ethnic density within ethnic groups. Our measures of psychological distress and social interactions have been widely validated. The small geographical scale (CCD) used to construct ethnic density provided a more accurate description of local circumstances than previous work which has relied upon larger spatial scales, helping to identify small 'pockets' of ethnic density and affluence that would otherwise have been hidden [34]. A limitation was that The 45 and Up Study was sampled

1  
2  
3 from the Medicare Australia database in which only includes Australian citizens and migrants on  
4 permanent residency visas. Migrants on temporary visas who are, by definition, ethnic minorities,  
5 were not represented in our study. Many studies have suggested that spatial variation in the  
6 experiences of racism could help to explain the ethnic density effect [7, 9]. Although we had no  
7 measure of racism in our study, virtually all benefits of ethnic density were already explained by  
8 other individual characteristics. Finally, our study represents only people 45 years and older, so it  
9 cannot discount the possibility of different patterns for younger age groups.  
10  
11

## 12 13 14 15 **CONCLUSION**

16 Ethnic groups in New South Wales, Australia, experience substantively different risks of  
17 psychological distress. These differences also align by country of birth, though there is no consistent  
18 pattern. Increasing social interactions, particularly those which help people to develop relationships  
19 with others they can depend on in times of need, are beneficial for mental health regardless of  
20 ethnicity and country of birth. In comparison, the ethnic density of where people live was protective  
21 only for the UK-born English and the overseas-born Australians.  
22  
23

## 24 25 26 27 **ACKNOWLEDGEMENTS, COMPETING INTERESTS & FUNDING**

28 We thank all of the men and women who participated in the 45 and Up Study. The 45 and Up Study  
29 is managed by the Sax Institute in collaboration with major partner Cancer Council New South Wales;  
30 and partners the Heart Foundation (NSW Division); NSW Ministry of Health; *beyondblue: the*  
31 *national depression initiative*; Ageing, Disability and Home Care, NSW Family and Community  
32 Services; and the Australian Red Cross Blood Service. We acknowledge the use of 2006 census and  
33 boundary data provided by the Australian Bureau of Statistics. To preserve the anonymity of  
34 participants in The 45 and Up Study, some parameters of the Census Collector District (CCD) level  
35 data cannot be reported. This location-indexing data from the 45 and up Study is highly restricted  
36 access and will be made available only through SURE (<https://www.sure.org.au/>).  
37  
38

39 The authors have no competing interests.  
40

41 No funding was sought for this study.  
42  
43  
44  
45  
46  
47  
48

## 49 50 **LIST OF FIGURES**

51 **Figure 1: Ethnic and country of birth differences in the rate of psychological distress (Kessler scores of 22 and over),**  
52 **adjusted for age and gender**

53  
54 **Figure 2: Ethnic and country of birth differences in mean own-group ethnic density (percentage) at the Census Collection**  
55 **District (CCD) scale, with minimum and maximum: sorted highest to lowest**  
56  
57  
58  
59  
60

## REFERENCES

- 1 Pickett K, Wilkinson R. People like us: ethnic group density effects on health. *Ethnicity and Health* 2008;**13**:321-34.
- 2 Shaw RJ, Atkin K, Bécares L, *et al.* Impact of ethnic density on adult mental disorders: narrative review. *The British Journal of Psychiatry* 2012;**201**:11-9.
- 3 Das-Munshi J, Becares L, Dewey ME, *et al.* Understanding the effect of ethnic density on mental health: multi-level investigation of survey data from England. *BMJ: British Medical Journal* 2010;**341**.
- 4 Yuan ASV. Racial composition of neighborhood and emotional well-being. *Sociological Spectrum* 2007;**28**:105-29.
- 5 Pickett KE, Shaw RJ, Atkin K, *et al.* Ethnic density effects on maternal and infant health in the Millennium Cohort Study. *Social Science & Medicine* 2009;**69**:1476-83.
- 6 Becares L, Nazroo J, Jackson J, *et al.* Ethnic density effects on health and experienced racism among Caribbean people in the US and England: A cross-national comparison. *Social Science & Medicine* 2012.
- 7 Becares L, Nazroo J, Stafford M. The buffering effects of ethnic density on experienced racism and health. *Health & Place* 2009;**15**:670-8.
- 8 Stafford M, Becares L, Nazroo J. Objective and Perceived Ethnic Density and Health: Findings From a United Kingdom General Population Survey. *American Journal of Epidemiology* 2009;**170**:484-93.
- 9 Astell-Burt T, Maynard MJ, Lenguerand E, *et al.* Racism, ethnic density and psychological well-being through adolescence: evidence from the Determinants of Adolescent Social well-being and Health longitudinal study. *Ethnicity and Health* 2012;**17**:71-87.
- 10 Gieling M, Vollebergh W, van Dorsselaer S. Ethnic density in school classes and adolescent mental health. *Soc Psychiatry Psychiatr Epidemiol* 2009.
- 11 Xue Y, Leventhal T, Brooks-Gunn J, *et al.* Neighborhood residence and mental health problems of 5-to 11-year-olds. *Archives of General Psychiatry* 2005;**62**:554.
- 12 Australian Bureau of Statistics. *A Picture of the Nation: The Statistician's Report on the 2006 Census*. Canberra: Australian Government 2006.
- 13 Anikeeva O, Bi P, Hiller JE, *et al.* The Health Status of Migrants in Australia: A Review. *Asia-Pacific Journal of Public Health* 2010;**22**:159-93.
- 14 Thorburn A. Prevalence of obesity in Australia. *Obesity reviews* 2005;**6**:187-9.
- 15 Johnston R, Forrest J, Poulsen M. Sydney's ethnic geography: new approaches to analysing patterns of residential concentration. *Australian Geographer* 2001;**32**:149-62.
- 16 Poulsen M, Johnston R, Forrest J. Is Sydney a divided city ethnically? *Australian geographical studies* 2004;**42**:356-77.
- 17 Dunn KM. Rethinking ethnic concentration: the case of Cabramatta, Sydney. *Urban Studies* 1998;**35**:503-27.
- 18 Banks E, Redman S, Jorm L, *et al.* Cohort profile: the 45 and up study. *International Journal of Epidemiology* 2008;**37**:941.
- 19 Kessler RC, Andrews G, Colpe LJ, *et al.* Short screening scales to monitor population prevalences and trends in non-specific psychological distress. *Psychological Medicine* 2002;**32**:959-76.
- 20 Furukawa TA, Kessler RC, Slade T, *et al.* The performance of the K6 and K10 screening scales for psychological distress in the Australian National Survey of Mental Health and Well-Being. *Psychological medicine* 2003;**33**:357-62.
- 21 Australian Bureau of Statistics. *Information paper: use of the Kessler Psychological Distress Scale in ABS Health Surveys, Australia*. Canberra: Australian Bureau of Statistics 2003.
- 22 Banks E, Byles JE, Gibson RE, *et al.* Is psychological distress in people living with cancer related to the fact of diagnosis, current treatment or level of disability? Findings from a large Australian study. *Medical Journal of Australia* 2010;**193**:92.

- 1  
2  
3 23 Byles JE, Gallienne L, Blyth FM, *et al.* Relationship of age and gender to the prevalence and  
4 correlates of psychological distress in later life. *International Psychogeriatrics* 2012;**1**:1-10.
- 5 24 George ES, Jorm L, Kolt GS, *et al.* Physical Activity and Psychological Distress in Older Men:  
6 Findings From the New South Wales 45 and Up Study. *Journal of Aging and Physical Activity*  
7 2012;**20**:300-16.
- 8 25 Koenig HG, Westlund RE, George LK, *et al.* Abbreviating the Duke Social Support Index for  
9 use in chronically ill elderly individuals. *Psychosomatics* 1993;**34**:61-9.
- 10 26 Howe C, Matthews LR, Heard R. Work to retirement: a snapshot of psychological health in a  
11 multicultural Australian population. *Work* 2010;**36**:119-27.
- 12 27 Pachana NA, Smith N, Watson M, *et al.* Responsiveness of the Duke Social Support sub-  
13 scales in older women. *Age & Ageing* 2008;**37**:666-72.
- 14 28 Chiew M, Weber M, Egger S, *et al.* A cross-sectional exploration of smoking status and social  
15 interaction in a large population-based Australian cohort. *Social Science & Medicine* 2012;**75**:77-86.
- 16 29 Australian Bureau of Statistics. 2006 Census Geographies: Census Collection District.  
17 Canberra 2012.
- 18 30 Australian Bureau of Statistics. *Research Paper. Socio-Economic Indexes for Areas:  
19 Introduction, Use and Future Directions*. Canberra: ABS 2006.
- 20 31 Trewin D. Socio-Economic Indexes for Areas (SEIFA). *Canberra, Australia: Australian Bureau  
21 of Statistics* 2001.
- 22 32 Australian Population and Migration Research Centre. ARIA (Accessibility/Remoteness Index  
23 of Australia). The University of Adelaide 2012.
- 24 33 Leyland AH, Goldstein H. *Multilevel modelling of health statistics*: Wiley 2001.
- 25 34 Exeter D, Flowerdew R, Boyle P. Policy implications of pockets of deprivation in Scotland. *GIS  
26 and Evidence-Based Policy Making* 2007:95.
- 27  
28  
29  
30  
31  
32  
33  
34  
35  
36  
37  
38  
39  
40  
41  
42  
43  
44  
45  
46  
47  
48  
49  
50  
51  
52  
53  
54  
55  
56  
57  
58  
59  
60

1  
2  
3  
4  
5  
6  
7  
8  
9  
10  
11  
12  
13  
14  
15  
16  
17  
18  
19  
20  
21  
22  
23  
24  
25  
26  
27  
28  
29  
30  
31  
32  
33  
34  
35  
36  
37  
38  
39  
40  
41  
42  
43  
44  
45  
46  
47  
48  
49  
50  
51  
52  
53  
54  
55  
56  
57  
58  
59  
60

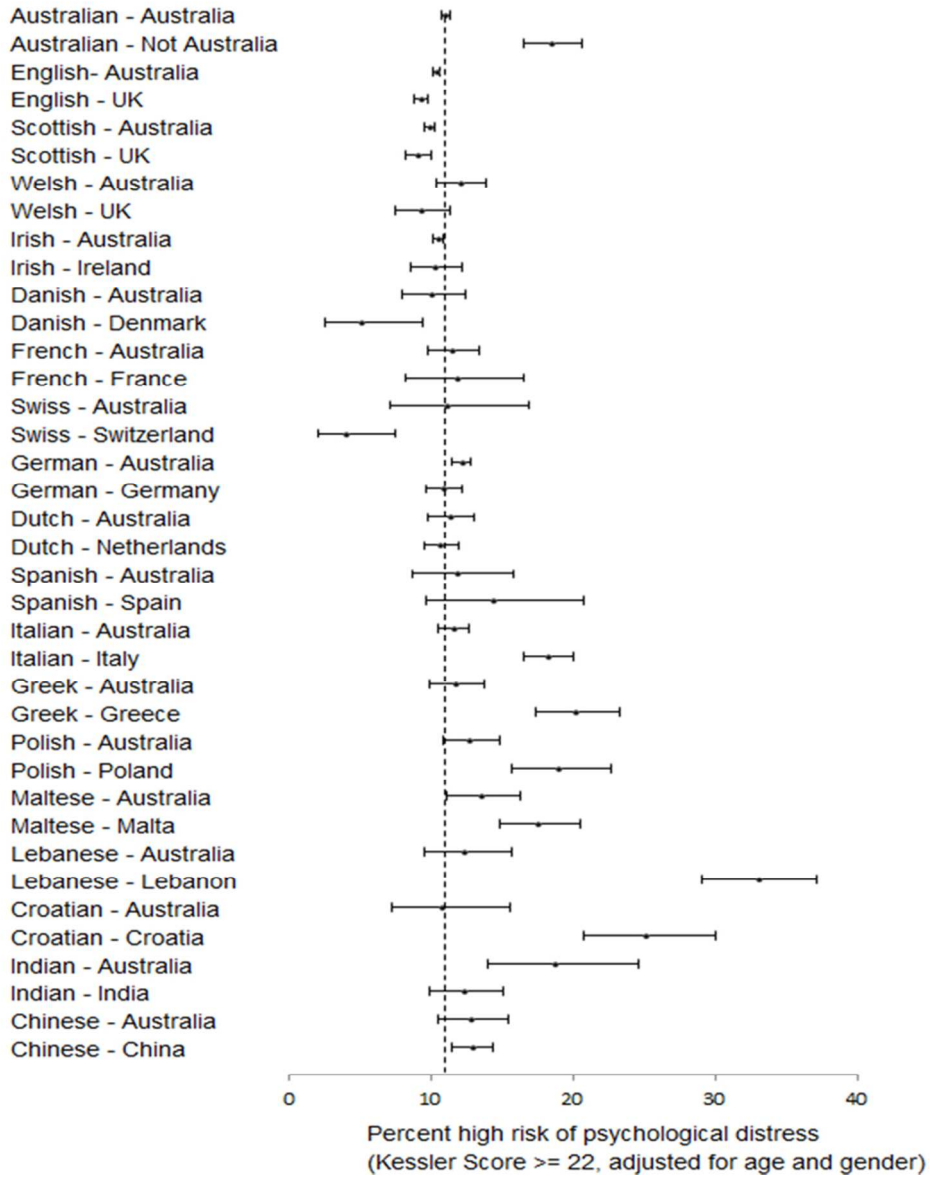

Figure 1: Ethnic and country of birth differences in the rate of psychological distress (Kessler scores of 22 and over), adjusted for age and gender  
154x212mm (150 x 129 DPI)



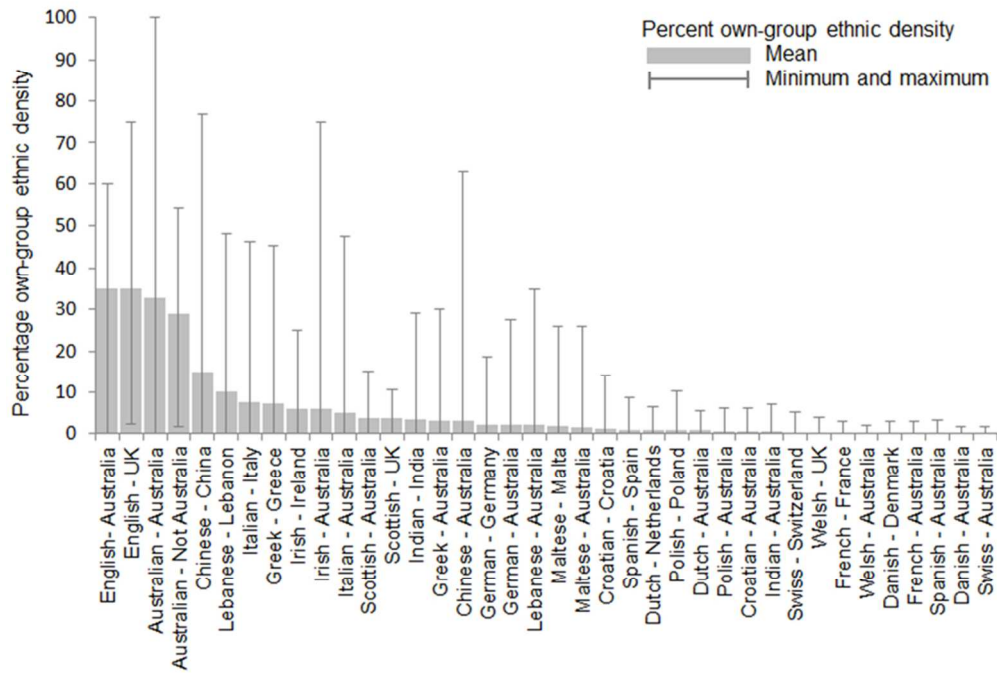

Figure 2: Ethnic and country of birth differences in mean own-group ethnic density (percentage) at the Census Collection District (CCD) scale, with minimum and maximum: sorted highest to lowest 254x179mm (96 x 96 DPI)

Review only

STROBE Statement—Checklist of items that should be included in reports of *cross-sectional studies*

|                           | Item No | Recommendation                                                                                                                  | Author comment and page number                                                                                                  |
|---------------------------|---------|---------------------------------------------------------------------------------------------------------------------------------|---------------------------------------------------------------------------------------------------------------------------------|
| <b>Title and abstract</b> | 1       | (a) Indicate the study's design with a commonly used term in the title or the abstract                                          | We have indicated in the title that this is a cross-sectional study. (see page 1)                                               |
|                           |         | (b) Provide in the abstract an informative and balanced summary of what was done and what was found                             | We have provided a structured abstract in line with JECH recommendations. (see page 1)                                          |
| <b>Introduction</b>       |         |                                                                                                                                 |                                                                                                                                 |
| Background/rationale      | 2       | Explain the scientific background and rationale for the investigation being reported                                            | We have explained the scientific background and rationale for the study in a two-paragraph introduction. (see page2)            |
| Objectives                | 3       | State specific objectives, including any prespecified hypotheses                                                                | We outline the objective of the study in the second paragraph of the introduction, see page2.                                   |
| <b>Methods</b>            |         |                                                                                                                                 |                                                                                                                                 |
| Study design              | 4       | Present key elements of study design early in the paper                                                                         | The study design is outlined in the first paragraph of the methods section, see page 2.                                         |
| Setting                   | 5       | Describe the setting, locations, and relevant dates, including periods of recruitment, exposure, follow-up, and data collection | The setting is outlined in the second paragraph of the introduction and the first paragraph of the methods section, see page 2. |
| Participants              | 6       | (a) Give the eligibility criteria, and the sources and methods of selection of participants                                     | Eligibility criteria and the selection of participant is discussed in paragraph 1 and 2                                         |

|                              |    |                                                                                                                                                                                      |                                                                                                                                                                                                                                                                                                          |
|------------------------------|----|--------------------------------------------------------------------------------------------------------------------------------------------------------------------------------------|----------------------------------------------------------------------------------------------------------------------------------------------------------------------------------------------------------------------------------------------------------------------------------------------------------|
|                              |    |                                                                                                                                                                                      | of the method section, see page 2 and 3                                                                                                                                                                                                                                                                  |
| Variables                    | 7  | Clearly define all outcomes, exposures, predictors, potential confounders, and effect modifiers. Give diagnostic criteria, if applicable                                             | All variables are discussed in paragraphs 2-8 of the method section, see page 2-4                                                                                                                                                                                                                        |
| Data sources/<br>measurement | 8* | For each variable of interest, give sources of data and details of methods of assessment (measurement). Describe comparability of assessment methods if there is more than one group | The primary source of data is the 45 and Up Study and this outlined in the first paragraph of the method section, see page 2. Details of measurement are provided separately for the outcome variable (psychological distress), other individual variables and neighbourhood level measures, see page 3. |
| Bias                         | 9  | Describe any efforts to address potential sources of bias                                                                                                                            | Sources of bias were discussed in the paragraph headed 'statistical analysis', see page 4. This focuses on adjustment for confounders and for the hierarchical data structure through the use of multilevel models.                                                                                      |
| Study size                   | 10 | Explain how the study size was arrived at                                                                                                                                            | Study size has been explained in paragraph 1 and 2 of the method section, see page 2 & 3                                                                                                                                                                                                                 |
| Quantitative variables       | 11 | Explain how quantitative variables were handled in the analyses. If applicable, describe which groupings were chosen and why                                                         | All variables have been outlined in the method section, see page 3 & 4 for details.                                                                                                                                                                                                                      |
| Statistical methods          | 12 | (a) Describe all statistical methods, including those used to                                                                                                                        | All methods have                                                                                                                                                                                                                                                                                         |

|                   |     |                                                                                                                                                                                                              |                                                                                                                                    |
|-------------------|-----|--------------------------------------------------------------------------------------------------------------------------------------------------------------------------------------------------------------|------------------------------------------------------------------------------------------------------------------------------------|
|                   |     | control for confounding                                                                                                                                                                                      | been described in                                                                                                                  |
|                   |     | (b) Describe any methods used to examine subgroups and interactions                                                                                                                                          | the section headed ‘statistical                                                                                                    |
|                   |     | (c) Explain how missing data were addressed                                                                                                                                                                  | analysis’, see page                                                                                                                |
|                   |     | (d) If applicable, describe analytical methods taking account of sampling strategy                                                                                                                           | 4. Explanation on how missing data                                                                                                 |
|                   |     | (e) Describe any sensitivity analyses                                                                                                                                                                        | were addressed in paragraph 2 of the method section, see page 3.                                                                   |
| <b>Results</b>    |     |                                                                                                                                                                                                              |                                                                                                                                    |
| Participants      | 13* | (a) Report numbers of individuals at each stage of study—eg numbers potentially eligible, examined for eligibility, confirmed eligible, included in the study, completing follow-up, and analysed            | Sample selection was described in paragraph 2 of the method section, see page 2 & 3.                                               |
|                   |     | (b) Give reasons for non-participation at each stage                                                                                                                                                         |                                                                                                                                    |
|                   |     | (c) Consider use of a flow diagram                                                                                                                                                                           |                                                                                                                                    |
| Descriptive data  | 14* | (a) Give characteristics of study participants (eg demographic, clinical, social) and information on exposures and potential confounders                                                                     | Characteristics of the study participants including sample sizes and prevalence of key                                             |
|                   |     | (b) Indicate number of participants with missing data for each variable of interest                                                                                                                          | outcome and explanatory variables are reported in paragraph 1-4 of the result section, see page 4 & 5, figure 1&2 and table 1 & 2. |
| Outcome data      | 15* | Report numbers of outcome events or summary measures                                                                                                                                                         |                                                                                                                                    |
| Main results      | 16  | (a) Give unadjusted estimates and, if applicable, confounder-adjusted estimates and their precision (eg, 95% confidence interval). Make clear which confounders were adjusted for and why they were included |                                                                                                                                    |
|                   |     | (b) Report category boundaries when continuous variables were categorized                                                                                                                                    |                                                                                                                                    |
|                   |     | (c) If relevant, consider translating estimates of relative risk into absolute risk for a meaningful time period                                                                                             |                                                                                                                                    |
| Other analyses    | 17  | Report other analyses done—eg analyses of subgroups and interactions, and sensitivity analyses                                                                                                               | Sub-group analysis is reported in paragraph 5 & 6 in the result section, see page 5 and table 3.                                   |
| <b>Discussion</b> |     |                                                                                                                                                                                                              |                                                                                                                                    |
| Key results       | 18  | Summarise key results with reference to study objectives                                                                                                                                                     | Key results are outlined briefly in paragraph 1 of the discussion section on page 6.                                               |
| Limitations       | 19  | Discuss limitations of the study, taking into account sources of potential bias or imprecision. Discuss both direction and                                                                                   | Strengths and limitations of the                                                                                                   |

|                          |    |                                                                                                                                                                            |                                                                                                                                        |
|--------------------------|----|----------------------------------------------------------------------------------------------------------------------------------------------------------------------------|----------------------------------------------------------------------------------------------------------------------------------------|
|                          |    | magnitude of any potential bias                                                                                                                                            | study are discussed in paragraph 3 of the discussion section, see page 6 & 7.                                                          |
| Interpretation           | 20 | Give a cautious overall interpretation of results considering objectives, limitations, multiplicity of analyses, results from similar studies, and other relevant evidence | Interpretation of the findings within the context of the previous literature is reported in paragraph 2 of the discussion, see page 6. |
| Generalisability         | 21 | Discuss the generalisability (external validity) of the study results                                                                                                      |                                                                                                                                        |
| <b>Other information</b> |    |                                                                                                                                                                            |                                                                                                                                        |
| Funding                  | 22 | Give the source of funding and the role of the funders for the present study and, if applicable, for the original study on which the present article is based              | No funding was sought for this study.                                                                                                  |

\*Give information separately for exposed and unexposed groups.

**Note:** An Explanation and Elaboration article discusses each checklist item and gives methodological background and published examples of transparent reporting. The STROBE checklist is best used in conjunction with this article (freely available on the Web sites of PLoS Medicine at <http://www.plosmedicine.org/>, Annals of Internal Medicine at <http://www.annals.org/>, and Epidemiology at <http://www.epidem.com/>). Information on the STROBE Initiative is available at [www.strobe-statement.org](http://www.strobe-statement.org).

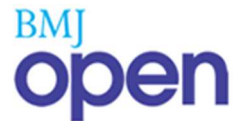

**Do social interactions explain ethnic differences in psychological distress and the protective effect of local ethnic density? Evidence from a cross-sectional study of 226,487 adults in middle-to-older age**

|                                 |                                                                                                                                                                                                                                                            |
|---------------------------------|------------------------------------------------------------------------------------------------------------------------------------------------------------------------------------------------------------------------------------------------------------|
| Journal:                        | <i>BMJ Open</i>                                                                                                                                                                                                                                            |
| Manuscript ID:                  | bmjopen-2013-002713.R1                                                                                                                                                                                                                                     |
| Article Type:                   | Research                                                                                                                                                                                                                                                   |
| Date Submitted by the Author:   | 25-Mar-2013                                                                                                                                                                                                                                                |
| Complete List of Authors:       | Feng, Xiaoqi; University of Western Sydney, Centre for Health Research, School of Medicine<br>Astell-Burt, Thomas; University of Western Sydney, School of Science and Health<br>Kolt, Gregory; University of Western Sydney, School of Science and Health |
| <b>Primary Subject Heading</b>: | Epidemiology                                                                                                                                                                                                                                               |
| Secondary Subject Heading:      | Epidemiology, Public health, Sociology                                                                                                                                                                                                                     |
| Keywords:                       | MENTAL HEALTH, EPIDEMIOLOGY, PUBLIC HEALTH, SOCIAL MEDICINE                                                                                                                                                                                                |
|                                 |                                                                                                                                                                                                                                                            |

SCHOLARONE™  
Manuscripts

1  
2  
3 **Do social interactions explain ethnic differences in psychological distress and the protective effect**  
4 **of local ethnic density? Evidence from a cross-sectional study of 226,487 adults in middle-to-older**  
5 **age**  
6  
7

8  
9  
10 **Xiaoqi Feng, PhD\* <sup>1</sup>**

11 **Thomas Astell-Burt, PhD\* <sup>2,3</sup>**

12  
13 **Gregory S. Kolt, PhD <sup>2</sup>**  
14

15  
16  
17 \*Corresponding Author, Centre of Health Research, School of Medicine, University of Western  
18 Sydney, Locked Bag 1797, Penrith, NSW 2751, Australia. +61 2 4620 3951. X.Feng@uws.edu.au  
19

20 1 Centre of Health Research, School of Medicine, University of Western Sydney, Australia

21 2 School of Science and Health, University of Western Sydney, Australia

22 3 School of Geography and Geosciences, University of St Andrews, UK  
23

24  
25 **KEYWORDS**  
26

27 MENTAL HEALTH; ETHNICITY; MULTILEVEL MODELLING; PUBLIC HEALTH; SOCIAL EPIDEMIOLOGY  
28  
29

30  
31 **WORD COUNT: 2721**  
32

33  
34  
35  
36 "The Corresponding Author has the right to grant on behalf of all authors and does grant on behalf of all authors,  
37 an exclusive licence (or non-exclusive for government employees) on a worldwide basis to the BMJ Group and  
38 co-owners or contracting owning societies (where published by the BMJ Group on their behalf), and its Licensees  
39 to permit this article (if accepted) to be published in Journal of Epidemiology and Community Health and any  
40 other BMJ Group products and to exploit all subsidiary rights, as set out in our licence."  
41  
42  
43  
44  
45  
46  
47  
48  
49  
50  
51  
52  
53  
54  
55  
56  
57  
58  
59  
60

1  
2  
3 **Do social interactions explain ethnic differences in psychological distress and the protective effect**  
4 **of local ethnic density? Evidence from a cross-sectional study of 226,487 adults in middle-to-older**  
5 **age**  
6  
7  
8

9  
10 **ABSTRACT**

11 **Background:** A frequently proposed, but under-researched hypothesis is that ethnic density benefits  
12 mental health through increasing social interactions. We examined this hypothesis in 226,487 adults  
13 from 19 ethnic groups aged 45 years and older in Australia.  
14

15 **Methods:** Multilevel logit regression was used to measure association **between ethnicity, social**  
16 **interactions, own-group ethnic density and** scores of 22+ on the Kessler scale of psychological  
17 distress. Self-reported ancestry was used as a proxy for ethnicity. Measures of social interactions  
18 included the number of times in the last week were: *i)* spent with friends or family participants did  
19 not live with; *ii)* talked to someone on the telephone; *iii)* attended meetings of social groups; and *iv)*  
20 how many people could be relied upon outside their home, but within one hour of travel. **Per cent**  
21 **own-group ethnic density was measured at the Census Collection District scale.**  
22  
23  
24

25 **Results:** Psychological distress was reported by 11% of Australians born in Australia. The risk of  
26 experiencing psychological distress varied among ethnic minorities and by country of birth (e.g. 33%  
27 for the Lebanese born in Lebanon, compared to 4% for the Swiss born in Switzerland). These  
28 differences remained after full adjustment. Social interactions varied between ethnic groups and  
29 were associated with lower psychological distress and ethnic density. Ethnic density was associated  
30 with reduced psychological distress for some groups. This association, however, was explained by  
31 individual and neighbourhood characteristics and not by social interactions.  
32  
33  
34

35 **Conclusion:** Social interactions are important correlates of mental health, but do not **fully** explain  
36 ethnic differences in psychological distress, nor the protective effect of own-group density.  
37  
38  
39

40  
41 **WHAT IS ALREADY KNOWN ON THIS SUBJECT?**

42 Ethnic differences in mental health, and the reportedly protective influence of own group ethnic  
43 density, are largely unexplained in previous studies. Social interactions are widely hypothesised as a  
44 mechanism linking ethnic density with more favourable mental health, and may also explain ethnic  
45 differences more generally. However, few studies have empirically tested these hypotheses.  
46  
47  
48

49 **WHAT THIS STUDY ADDS?**

50 In a large cohort of Australian adults in middle-to-older age, ethnic differences in mental health were  
51 not explained by four measures of social interactions. Protective associations between ethnic  
52 density and mental health were largely explained by individual-level socioeconomic characteristics,  
53 not social interactions.  
54  
55  
56  
57  
58  
59  
60



1  
2  
3 **Do social interactions explain ethnic differences in psychological distress and the protective effect**  
4 **of local ethnic density? Evidence from a cross-sectional study of 226,487 adults in middle-to-older**  
5 **age**  
6  
7  
8

9  
10 **SUMMARY**

11 **Article Focus:**

- 12  
13  
14
  - Ethnic differences in mental health, and the reportedly protective influence of own group ethnic density, are largely unexplained in previous studies.
  - Social interactions are widely hypothesised as a mechanism linking ethnic density with more favourable mental health, and may also explain ethnic differences more generally. However, few studies have empirically tested these hypotheses.
  - We examined this hypothesis in 226,713 adults from 19 ethnic groups aged 45 years and older in Australia.

15  
16  
17  
18  
19  
20  
21  
22  
23

24  
25 **Key Messages:**

- 26  
27
  - Ethnic differences in mental health persisted after full adjustment; they were not explained by four measures of social interactions, or other individual and neighbourhood characteristics.
  - Protective associations between ethnic density and mental health were largely explained by individual-level socioeconomic characteristics, not social interactions.

28  
29  
30  
31  
32  
33  
34  
35

36 **Strengths and Limitations:**

- 37  
38
  - Large samples allowed for stratification of ethnic groups to investigate differences in mental health, social interactions and ethnic density by country of birth
  - The use of a very small geographical scale than in previous work allowed for the ascertainment of local 'pockets' of ethnic density, which would otherwise have been hidden if the study had been dependent upon larger spatial units
  - Some of the remaining ethnic inequalities in mental health could be explained by systematic differences in the experience of racial discrimination which we were unable to control for

39  
40  
41  
42  
43  
44  
45  
46  
47  
48  
49  
50  
51  
52  
53  
54  
55  
56  
57  
58  
59  
60

## INTRODUCTION

The existence of ethnic differences in mental health have long been reported, though not fully explained<sup>1-3</sup>. It has been suggested that living in areas of higher own group ethnic density reduces the risk of psychological distress, with increased social support hypothesised to be one of the primary drivers<sup>4</sup>. Social norms and support networks that promote resilience to material disadvantage and sources of psychosocial stress (e.g. racism<sup>5</sup>) are thought to be encouraged and maintained by this geographical clustering of ethnic groups<sup>6</sup>; even in deprived communities<sup>7-9</sup>. However, there is very little empirical evidence on the extent that increased social support explains why some groups tend to report better mental health in ethnically dense neighbourhoods.

Only two studies have been identified that have examined this proposition, one in the UK and another in the US, with equivocal results<sup>10,11</sup>. More broadly, studies of ethnic density and mental health have been mostly based upon adolescents and adults of child-bearing age in European and North American datasets<sup>10-18</sup>. Few studies have been conducted on adults in middle to older age, and no research has been conducted in Australia, which is surprising when one considers that, of the 22.6 million population, over one quarter were born outside Australia<sup>19</sup> and 50% of whom originated from non-English-speaking countries<sup>20</sup>.

Australian cities are some of the most ethnically diverse in the world<sup>21</sup> and often contain substantial residential clustering of ethnic groups<sup>22-24</sup>. Contrasting migration histories and residential patterns of ethnic groups means that one cannot assume association between ethnic density and mental health reported in Europe and North America generalises to the Australian context. Therefore, more research is required not only to further understand the mechanisms underlying ethnic density effects, but also to identify the extent that ethnic density may be beneficial to mental health in other ethnically diverse countries like Australia. In this paper we attempt to achieve both of these aims, in addition to an examination of ethnic differences in mental health and the role of social support more generally, through an analysis of a large number of ethnic groups and four measures of social interactions in an Australian cohort of adults.

## METHOD

### Study population

The 45 and Up study<sup>25</sup> is a large scale cohort of 267,151 residents aged 45 and over in New South Wales ('NSW', the most populous state in Australia). A baseline questionnaire covering a range of health and social issues was distributed to a random sample of adults listed in the Medicare Australia database between 2006 and 2009 inclusive. Medicare Australia is the database through which national healthcare is provided for Australian citizens and permanent residents, as well as some temporary residents and refugees<sup>25</sup>. Response to the questionnaire was 18%, which is low, though previous research has suggested that results from the 45 and Up Study are broadly comparable to those derived from 'representative' samples<sup>26</sup>. The University of New South Wales Human Research Ethics Committee approved The 45 and Up Study. Further details including the baseline questionnaire are available to download from [www.45andUp.org.au](http://www.45andUp.org.au).

1  
2  
3 Ethnicity status was derived from the first (of up to two) responses to a question on self-reported  
4 ancestry ('What is your ancestry?'). Secondary responses to this question were not used in the  
5 definition of ethnicity as they were not available in our dataset. We focused on the 19 largest  
6 groups: Australian, English, Scottish, Welsh, Irish, Danish, French, Swiss, German, Dutch, Spanish,  
7 Italian, Greek, Polish, Maltese, Lebanese, Croatian, Indian, and Chinese. Large sample sizes allowed  
8 for stratification of each group by country of birth (assessed by the question 'in which country were  
9 you born?') to address healthy-migrant effects. We retained all participants born in Australia  
10 (n=179,712), all participants of Australian ethnicity born outside Australia (n=1,336), and participants  
11 of non-Australian ethnic groups born in their ethnic-country of origin (n=33,739). Participants of  
12 non-Australian ethnic groups born elsewhere (i.e. not Australia or their ethnic-country of origin)  
13 were omitted from the sample (n=33,574) for substantive and practical reasons. Non-Australian  
14 ethnic groups born overseas and not in the ethnic-country of origin were heterogeneous by  
15 definition, which made it difficult to meaningfully interpret any results for to these participants.  
16 Furthermore, in practical terms, the sample sizes of many of these groups were small, which also  
17 reduced the potential to draw reliable statistical inference. We also omitted all participants missing  
18 a postcode identifier (n=263) and those missing a valid outcome measure (n=7,011). Missing data  
19 for independent variables was resolved via imputing the mean of the observed values, retaining an  
20 overall sample size of n=226,487.  
21  
22  
23  
24  
25  
26  
27

### 28 Psychological distress

29  
30 We used the Kessler Psychological Distress Scale (K10) to evaluate mental health status<sup>27 28</sup>. The K10  
31 measures symptoms of psychological distress experienced over the past four weeks, including  
32 feeling tired for no reason, nervous, hopeless, restless, depressed, sad and worthless. Participants  
33 had five choices for each of the ten questions (none of the time =1, a little of the time =2, some of  
34 the time =3, most of the time =4, all of the time=5) and these were summed to give the overall score.  
35 **The K10 have been previously used to gauge levels of psychological distress across different**  
36 **countries and ethnic groups**<sup>28-31</sup>. We constructed a binary variable wherein a score of 22 or more  
37 identified participants with a high risk of psychological distress<sup>32</sup>. The K10 has been used in this  
38 binary manner, with 22 as the cut-point, in previous published analyses of The 45 and Up Study<sup>33-35</sup>.  
39  
40  
41  
42  
43  
44

### 45 Other individual-level measures

46 Social interactions were measured using four questions from the shortened version of the Duke  
47 Social Support Index<sup>36</sup>. Three of the questions tested the number of times in the past week a  
48 participant: i) spent time with friends or family they did not live with; ii) talked to someone (friends,  
49 relatives or others) on the telephone; iii) attended meetings at social clubs or religious groups. The  
50 final question asked participants how many people outside their home, but within one hour travel-  
51 time, did they feel close to or could rely on. Previous work has constructed a composite indicator of  
52 social support from responses to these questions<sup>37 38</sup>, though we analysed each one separately in  
53 line with recent studies which have demonstrated that some are more important than others<sup>39</sup>.  
54  
55  
56  
57  
58  
59  
60

1  
2  
3 We also accounted for other individual-level variables (self-reported) which are known to correlate  
4 with mental health. These included: age, gender, physical activity, smoking status, Body Mass Index  
5 (BMI), highest educational qualifications, economic status, annual household income, couple status,  
6 and whether language(s) other than English were spoken at home.  
7  
8  
9

### 10 11 **Neighbourhood-level measures**

12 This study used Census Collection Districts (CCD) to define neighbourhoods. With a mean of 225  
13 residents<sup>40</sup>, CCDs were the smallest geographical scale for which 2006 Census data was made  
14 available<sup>41</sup>. However, 9% of participants in The 45 and Up Study were missing a valid CCD. As nearly  
15 100% had a postcode identifier, we assigned those missing a CCD with a pseudo-CCD according to  
16 the location of the population-weighted postcode centroid. Therefore, 100% of the sample could be  
17 assigned neighbourhood measures and clustering within regression models could be operationalized  
18 at the CCD level.  
19  
20  
21

22 We constructed the measure of own-group ethnic density from 2006 Census data. **The Census**  
23 **question on ancestry (a surrogate for ethnicity in our study) was very similar to that used in the 45**  
24 **and Up Study (“What is the person’s ancestry?”)**. The number of people within a CCD pertaining to  
25 each participant’s ethnic group was divided the total usual resident population. For example,  
26 Chinese participants (regardless of their country of birth) were assigned the percentage of the  
27 population in their CCD who self-identified as Chinese.  
28  
29

30 Other neighbourhood measures included local affluence and geographical remoteness. We used the  
31 Socio-Economic Index for Areas (SEIFA) ‘Index of Relative Socio-Economic Advantage/Disadvantage’  
32<sup>42</sup> to measure local affluence. **This is a variable derived by the Australian Bureau of Statistics (ABS)**  
33 **using Census variables which relate to advantage and disadvantage, including household income**  
34 **and educational qualifications. This indicator** was expressed in percentiles; higher percentiles  
35 indicate more affluent areas. Geographical remoteness was measured using the  
36 ‘Accessibility/Remoteness Index of Australia’ (ARIA)<sup>43</sup>. ARIA is a score ranging from 0 to 15, with  
37 scores of 2.4 and over used to distinguish between urban and inner regions (<2.4) and rural or  
38 remote (>=2.4).  
39  
40  
41  
42  
43  
44

### 45 **Statistical analysis**

46 The study population was first assessed using descriptive statistics. Measures of ethnic density were  
47 mapped across NSW. To investigate ethnic differences in psychological distress, multilevel logistic  
48 regression was used to account for the clustering of participants within CCDs<sup>44</sup>. The sample was  
49 clustered within 11,621 CCDs (20 participants per CCD on average). CCDs accounted for 3.3% of the  
50 variation in psychological distress within a ‘null’ two-level multilevel model. A categorical variable  
51 identifying ethnic groups stratified by country of birth was fitted in this model, which was then  
52 adjusted for age and gender. We proceeded to test whether any ethnic differences in psychological  
53 distress remained significant after controlling for social interactions, other individual-level variables,  
54 local affluence and geographical remoteness. **Multilevel logit regression was fitted to ethnic and**  
55 **country of birth-specific groups (i.e. stratified models) to investigate association between**  
56  
57  
58  
59  
60

1  
2  
3 **psychological distress and own-group ethnic density.** To assess whether these associations could  
4 be explained by social interactions, we first tested the extent of correlation between each measure  
5 and own-group ethnic density using negative-binomial regression (to account for the skewed  
6 distribution of the social interaction variables). Social interactions were then fitted into the logit  
7 models, followed by individual-level variables, local affluence and geographical remoteness.  
8 Interaction terms were fitted to test for potential synergistic effects between ethnic density and  
9 other neighbourhood variables. Statistically significant associations were identified using the log-  
10 likelihood ratio test ( $p < 0.05$ ). All analyses were conducted in STATA 12.  
11  
12

## 13 14 15 16 **RESULTS**

17  
18 Figure 1 reports differences in the age- and gender-adjusted prevalence of psychological distress by  
19 ethnicity and country of birth. The rate of high psychological distress was 11% for Australians born in  
20 Australia. In comparison, this risk was far higher for some groups, for example, 33% for the Lebanese  
21 born in Lebanon, but much lower for others, such as the Swiss born in Switzerland at 4%. There was  
22 no consistent effect of migrant status on the risk of psychological distress. For example, the  
23 prevalence of psychological distress among Croatians born in Croatia was 14.3% higher than their  
24 Australian born Croatian peers. In contrast, no substantive difference in the prevalence of  
25 psychological distress was reported among the Chinese, whether born in Australia (12.8%) or China  
26 (12.9%), and the Danish born in Australia had twice the risk of their Danish born contemporaries (10%  
27 to 5% respectively).  
28  
29  
30  
31  
32  
33  
34

35 <Figure 1 here>  
36  
37  
38  
39  
40

41 Table 1 reports the percentage of each ethnic and country of birth group within the lowest quartile  
42 of the four social interactions measures. **P-values for comparisons between ethnic and country of  
43 birth groups for each social interaction variable were calculated using logistic regression.**  
44 Compared to their Australian-born peers, those born within their ethnic country of origin tended to  
45 be more prevalent in the lowest quartile of every measure of social interactions. For the variable  
46 denoting how many people a person felt they could rely on, within group differences were notably  
47 wide between the Australian-born and those born in the ethnic country of origin for the French  
48 (34.1%, 52%), Polish (37.8%, 51%), Lebanese (26.2%, 45.7%) and Chinese (32.8%, 56.7%).  
49  
50  
51  
52  
53  
54  
55  
56  
57  
58  
59  
60

**Table 1: Ethnic and country of birth differences in social interactions; percentage in the lowest quartile for each measure of social interactions**

| Ethnic group, country of birth | N (%)         | Social interactions                                  |                                       |                                          |                                 |
|--------------------------------|---------------|------------------------------------------------------|---------------------------------------|------------------------------------------|---------------------------------|
|                                |               | <i>Less likely to spend time with friends/family</i> | <i>Less likely to talk to someone</i> | <i>Less likely to go to social clubs</i> | <i>Few people can depend on</i> |
| Australia, Australia           | 61,848 (27.3) | 35.9 (35.51, 36.30)                                  | 26.1 (25.72, 26.45)                   | 42.1 (41.68, 42.51)                      | 30.5 (30.10, 30.88)             |
| Australian, Not Australia      | 1,383 (0.6)   | 37.9 (35.37, 40.54)                                  | 30.2 (27.85, 32.73)***                | 37.9 (35.37, 40.59)***                   | 36.7 (34.15, 39.28)***          |
| English, Australia             | 50,480 (22.3) | 35.6 (35.16, 36.03)                                  | 25.5 (25.06, 25.86)*                  | 41.3 (40.89, 41.80)*                     | 30.1 (29.64, 30.49)             |
| English, UK                    | 16,356 (7.2)  | 41.4 (40.66, 42.21)***                               | 28.5 (27.82, 29.24)***                | 43.9 (43.15, 44.73)***                   | 37.9 (37.17, 38.71)***          |
| Scottish, Australia            | 21,745 (9.6)  | 35.1 (34.47, 35.78)*                                 | 24.6 (24.06, 25.24)***                | 40.5 (39.86, 41.21)***                   | 29.2 (28.57, 29.81)***          |
| Scottish, UK                   | 3,759 (1.7)   | 37.8 (36.28, 39.43)*                                 | 27.8 (26.32, 29.23)*                  | 42.9 (41.28, 44.53)                      | 35.8 (34.26, 37.37)***          |
| Welsh, Australia               | 1,265 (0.6)   | 36.6 (33.99, 39.38)                                  | 25.0 (22.67, 27.51)                   | 40.3 (37.58, 43.11)                      | 30.0 (27.48, 32.58)             |
| Welsh, UK                      | 835 (0.4)     | 42.4 (39.06, 45.87)***                               | 28.9 (25.89, 32.12)                   | 44.6 (41.14, 48.05)                      | 38.0 (34.68, 41.35)***          |
| Irish, Australia               | 33,360 (14.7) | 35.0 (34.52, 35.58)**                                | 24.1 (23.58, 24.53)***                | 39.7 (39.20, 40.30)***                   | 30.4 (29.91, 30.94)             |
| Irish, Ireland                 | 1,048 (0.5)   | 40.9 (37.89, 43.92)***                               | 27.5 (24.90, 30.34)                   | 36.7 (33.71, 39.69)***                   | 36.3 (33.37, 39.25)***          |
| Danish, Australia              | 695 (0.3)     | 36.4 (32.84, 40.09)                                  | 24.7 (21.58, 28.11)                   | 37.7 (34.11, 41.46)*                     | 30.2 (26.88, 33.74)             |
| Danish, Denmark                | 178 (0.1)     | 49.0 (41.63, 56.43)***                               | 34.2 (27.55, 41.57)*                  | 55.3 (47.76, 62.56)***                   | 42.3 (35.15, 49.78)***          |
| French, Australia              | 1,195 (0.5)   | 37.9 (35.18, 40.77)                                  | 26.3 (23.78, 28.92)                   | 44.1 (41.20, 46.95)                      | 34.1 (31.46, 36.87)**           |
| French, France                 | 237 (0.1)     | 47.1 (40.76, 53.58)***                               | 29.9 (24.30, 36.10)                   | 53.4 (46.92, 59.85)***                   | 52.0 (45.51, 58.36)***          |
| Swiss, Australia               | 163 (0.1)     | 40.9 (33.48, 48.67)                                  | 23.5 (17.62, 30.70)                   | 49.7 (41.86, 57.48)                      | 34.5 (27.59, 42.20)             |
| Swiss, Switzerland             | 224 (0.1)     | 49.6 (43.01, 56.23)***                               | 35.8 (29.66, 42.36)***                | 51.1 (44.46, 57.77)***                   | 45.1 (38.62, 51.76)***          |
| German, Australia              | 9,894 (4.4)   | 36.1 (35.18, 37.11)                                  | 26.4 (25.49, 27.27)                   | 41.4 (40.41, 42.41)                      | 31.0 (30.12, 31.97)             |
| German, Germany                | 2,073 (0.9)   | 48.0 (45.82, 50.19)***                               | 35.4 (33.33, 37.54)***                | 50.6 (48.38, 52.79)***                   | 45.8 (43.63, 47.99)***          |
| Dutch, Australia               | 1,487 (0.7)   | 35.0 (32.61, 37.43)                                  | 27.8 (25.57, 30.11)                   | 41.6 (39.09, 44.15)                      | 31.2 (28.93, 33.65)             |
| Dutch, Netherlands             | 2,451 (1.1)   | 40.8 (38.88, 42.85)***                               | 30.7 (28.87, 32.57)***                | 42.4 (40.39, 44.43)                      | 37.7 (35.78, 39.68)***          |
| Spanish, Australia             | 316 (0.1)     | 40.8 (35.42, 46.36)                                  | 28.6 (23.72, 33.93)                   | 46.6 (41.05, 52.22)                      | 30.0 (25.15, 35.25)             |
| Spanish, Spain                 | 158 (0.1)     | 45.5 (37.82, 53.48)*                                 | 31.4 (24.55, 39.12)                   | 53.9 (45.89, 61.72)**                    | 47.3 (39.57, 55.25)***          |
| Italian, Australia             | 3,259 (1.4)   | 35.5 (33.88, 37.18)                                  | 25.8 (24.33, 27.34)                   | 41.2 (39.49, 42.93)                      | 32.0 (30.42, 33.66)             |
| Italian, Italy                 | 1,922 (0.9)   | 37.4 (35.21, 39.62)                                  | 29.5 (27.48, 31.58)***                | 48.1 (45.84, 50.43)***                   | 36.5 (34.36, 38.75)***          |
| Greek, Australia               | 1,072 (0.5)   | 34.1 (31.36, 37.03)                                  | 21.2 (18.92, 23.75)***                | 44.0 (40.98, 47.03)                      | 30.1 (27.44, 32.96)             |
| Greek, Greece                  | 696 (0.3)     | 38.6 (35.02, 42.39)                                  | 30.5 (27.14, 34.09)**                 | 45.8 (42.01, 49.61)                      | 44.4 (40.63, 48.14)***          |
| Polish, Australia              | 1,111 (0.5)   | 39.0 (36.14, 41.91)*                                 | 28.7 (26.05, 31.41)                   | 41.8 (38.86, 44.72)                      | 37.8 (34.94, 40.70)***          |
| Polish, Poland                 | 471 (0.2)     | 47.5 (42.98, 52.12)***                               | 38.7 (34.31, 43.27)***                | 46.4 (41.80, 51.06)                      | 51.0 (46.37, 55.52)***          |
| Maltese, Australia             | 675 (0.3)     | 35.0 (31.53, 38.66)                                  | 28.8 (25.49, 32.29)                   | 41.1 (37.47, 44.93)                      | 29.2 (25.94, 32.79)             |
| Maltese, Malta                 | 715 (0.3)     | 38.7 (35.19, 42.43)                                  | 30.1 (26.78, 33.57)*                  | 38.9 (35.29, 42.59)                      | 38.9 (35.31, 42.57)***          |
| Lebanese, Australia            | 461 (0.2)     | 34.0 (29.83, 38.49)                                  | 23.5 (19.81, 27.54)                   | 37.5 (33.16, 42.06)*                     | 26.2 (22.35, 30.39)*            |
| Lebanese, Lebanon              | 567 (0.3)     | 30.9 (27.24, 34.78)*                                 | 29.6 (25.99, 33.43)                   | 41.4 (37.34, 45.56)                      | 45.7 (41.56, 49.89)***          |
| Croatian, Australia            | 218 (0.1)     | 37.3 (31.12, 43.93)                                  | 22.9 (17.83, 28.92)                   | 44.9 (38.34, 51.74)                      | 34.3 (28.32, 40.93)             |
| Croatian, Croatia              | 349 (0.2)     | 43.4 (38.20, 48.74)**                                | 40.8 (35.63, 46.14)***                | 47.3 (42.00, 52.68)                      | 48.0 (42.75, 53.36)***          |
| Indian, Australia              | 213 (0.1)     | 39.0 (32.60, 45.72)                                  | 20.8 (15.90, 26.69)                   | 43.6 (36.97, 50.42)                      | 32.3 (26.38, 38.90)             |
| Indian, India                  | 668 (0.3)     | 47.7 (43.91, 51.61)***                               | 26.3 (23.12, 29.66)                   | 26.5 (23.29, 29.88)***                   | 39.4 (35.66, 43.18)***          |
| Chinese, Australia             | 690 (0.3)     | 39.3 (35.68, 43.03)                                  | 28.7 (25.41, 32.24)                   | 40.5 (36.80, 44.23)                      | 32.8 (29.36, 36.41)             |
| Chinese, China                 | 2,250 (1.0)   | 53.5 (51.40, 55.62)***                               | 40.5 (38.42, 42.57)***                | 42.5 (40.42, 44.59)                      | 56.7 (54.62, 58.82)***          |

\*\*\* p < 0.001; \*\* p < 0.01; \* p < 0.05 (from Australian, Australia)

Table 2 reports results from multilevel logit regression. Model 1 reports ethnic and country of birth differences in psychological distress, adjusted for age and gender (sensu Figure 1). We adjusted this model for each social interaction variable individually, and then simultaneously (Model 2). Higher quartiles of each social interaction variable were associated with a lower risk of psychological distress; especially that denoting the number of people that can be relied on (highest quartile odds ratio: 0.36, 95% confidence interval: 0.34, 0.38). Social interactions only fully explained the higher risk of psychological distress experienced by the Chinese born in China (as denoted by statistical

significance). However, there were other instances where odds ratios were attenuated, though remained significant, and this was often for people born outside Australia, such as the Lebanese born in Lebanon (OR=3.97 to 3.67) and the Croatians born in Croatia (OR=2.70 to 2.30). Adjusting for all other individual-level characteristics, neighbourhood affluence and geographical remoteness (Model 3) had a more substantive effect on the ethnic differences (OR=3.67 to 2.11 for the Lebanese born in Lebanon; OR=2.30 to 1.84 for the Croatians born in Croatia).

**Table 2: Ethnic and country of birth group differences in the risk of psychological distress, adjusted for social interactions variables and other individual and neighbourhood characteristics**

| Ethnicity, country of birth                      | Model 1                              | Model 2              | Model 3              |
|--------------------------------------------------|--------------------------------------|----------------------|----------------------|
|                                                  | Odds Ratio (95% Confidence Interval) |                      |                      |
| Australian, Australia                            | 1                                    | 1                    | 1                    |
| Australian, Not Australia                        | 1.83 (1.59, 2.10)***                 | 1.73 (1.50, 1.99)*** | 1.57 (1.36, 1.82)*** |
| English, Australia                               | 0.93 (0.90, 0.97)***                 | 0.94 (0.90, 0.98)*** | 0.96 (0.92, 1.00)*   |
| English, UK                                      | 0.83 (0.78, 0.88)***                 | 0.75 (0.71, 0.80)*** | 0.82 (0.77, 0.87)*** |
| Scottish, Australia                              | 0.89 (0.84, 0.93)***                 | 0.90 (0.86, 0.95)*** | 0.96 (0.91, 1.01)    |
| Scottish, UK                                     | 0.81 (0.72, 0.90)***                 | 0.76 (0.68, 0.85)*** | 0.82 (0.73, 0.92)*** |
| Welsh, Australia                                 | 1.10 (0.93, 1.31)                    | 1.12 (0.94, 1.33)    | 1.19 (1.00, 1.42)    |
| Welsh, UK                                        | 0.82 (0.65, 1.04)                    | 0.75 (0.60, 0.95)*   | 0.84 (0.66, 1.07)    |
| Irish, Australia                                 | 0.95 (0.91, 0.99)*                   | 0.96 (0.92, 1.01)    | 0.99 (0.95, 1.04)    |
| Irish, Ireland                                   | 0.93 (0.76, 1.13)                    | 0.87 (0.71, 1.06)    | 0.92 (0.75, 1.12)    |
| Danish, Australia                                | 0.90 (0.70, 1.15)                    | 0.91 (0.71, 1.17)    | 0.94 (0.73, 1.21)    |
| Danish, Denmark                                  | 0.43 (0.22, 0.84)*                   | 0.36 (0.18, 0.71)**  | 0.38 (0.19, 0.77)**  |
| French, Australia                                | 1.04 (0.87, 1.24)                    | 1.01 (0.84, 1.21)    | 0.99 (0.83, 1.19)    |
| French, France                                   | 1.08 (0.73, 1.60)                    | 0.87 (0.58, 1.29)    | 1.00 (0.67, 1.51)    |
| Swiss, Australia                                 | 1.01 (0.62, 1.65)                    | 1.00 (0.61, 1.63)    | 1.14 (0.69, 1.88)    |
| Swiss, Switzerland                               | 0.33 (0.17, 0.65)***                 | 0.27 (0.14, 0.53)*** | 0.33 (0.17, 0.65)*** |
| German, Australia                                | 1.12 (1.05, 1.19)***                 | 1.11 (1.04, 1.19)*** | 1.10 (1.02, 1.17)**  |
| German, Germany                                  | 0.98 (0.86, 1.13)                    | 0.82 (0.71, 0.94)**  | 0.87 (0.75, 1.00)*   |
| Dutch, Australia                                 | 1.03 (0.88, 1.22)                    | 1.02 (0.87, 1.20)    | 1.07 (0.90, 1.27)    |
| Dutch, Netherlands                               | 0.96 (0.85, 1.09)                    | 0.88 (0.78, 1.01)    | 0.91 (0.80, 1.04)    |
| Spanish, Australia                               | 1.08 (0.77, 1.52)                    | 1.08 (0.76, 1.52)    | 0.92 (0.64, 1.33)    |
| Spanish, Spain                                   | 1.35 (0.87, 2.11)                    | 1.14 (0.73, 1.79)    | 1.06 (0.67, 1.67)    |
| Italian, Australia                               | 1.05 (0.94, 1.18)                    | 1.04 (0.93, 1.17)    | 1.07 (0.96, 1.21)    |
| Italian, Italy                                   | 1.79 (1.59, 2.02)***                 | 1.68 (1.49, 1.89)*** | 1.46 (1.29, 1.65)**  |
| Greek, Australia                                 | 1.07 (0.88, 1.29)                    | 1.08 (0.89, 1.30)    | 1.11 (0.91, 1.35)    |
| Greek, Greece                                    | 2.04 (1.69, 2.46)***                 | 1.81 (1.50, 2.19)*** | 1.33 (1.10, 1.62)**  |
| Polish, Australia                                | 1.17 (0.98, 1.40)                    | 1.10 (0.92, 1.32)    | 1.15 (0.95, 1.39)    |
| Polish, Poland                                   | 1.89 (1.51, 2.37)***                 | 1.54 (1.22, 1.94)*** | 1.64 (1.30, 2.08)*** |
| Maltese, Australia                               | 1.26 (1.01, 1.57)*                   | 1.27 (1.01, 1.59)*   | 1.11 (0.88, 1.41)    |
| Maltese, Malta                                   | 1.71 (1.41, 2.09)***                 | 1.59 (1.30, 1.94)*** | 1.19 (0.97, 1.46)    |
| Lebanese, Australia                              | 1.13 (0.85, 1.50)                    | 1.22 (0.92, 1.62)    | 1.31 (0.98, 1.75)    |
| Lebanese, Lebanon                                | 3.97 (3.30, 4.76)***                 | 3.67 (3.04, 4.42)*** | 2.11 (1.73, 2.57)*** |
| Croatian, Australia                              | 0.97 (0.63, 1.49)                    | 0.94 (0.61, 1.46)    | 1.00 (0.64, 1.56)    |
| Croatian, Croatia                                | 2.70 (2.11, 3.46)***                 | 2.30 (1.78, 2.96)*** | 1.84 (1.42, 2.39)*** |
| Indian, Australia                                | 1.86 (1.31, 2.63)***                 | 1.88 (1.33, 2.68)*** | 1.64 (1.14, 2.35)**  |
| Indian, India                                    | 1.13 (0.89, 1.43)                    | 1.07 (0.84, 1.36)    | 1.43 (1.12, 1.83)**  |
| Chinese, Australia                               | 1.18 (0.94, 1.48)                    | 1.16 (0.92, 1.45)    | 1.18 (0.93, 1.50)    |
| Chinese, China                                   | 1.19 (1.05, 1.35)**                  | 0.90 (0.79, 1.02)    | 1.05 (0.92, 1.20)    |
| Number of occasions spent with friends or family |                                      |                      |                      |
| Quartile 1 (Low)                                 |                                      | 1                    | 1                    |
| Quartile 2 (Low to Moderate)                     |                                      | 0.77 (0.74, 0.81)*** | 0.78 (0.75, 0.82)*** |
| Quartile 3 (Moderate to High)                    |                                      | 0.80 (0.77, 0.83)*** | 0.78 (0.75, 0.81)*** |
| Quartile 4 (High)                                |                                      | 1.00 (0.97, 1.04)    | 0.89 (0.85, 0.92)*** |
| Number of telephone conversations                |                                      |                      |                      |
| Quartile 1 (Low)                                 |                                      | 1                    | 1                    |
| Quartile 2 (Low to Moderate)                     |                                      | 0.77 (0.74, 0.80)*** | 0.82 (0.79, 0.85)*** |
| Quartile 3 (Moderate to High)                    |                                      | 0.79 (0.76, 0.82)*** | 0.83 (0.80, 0.87)*** |
| Quartile 4 (High)                                |                                      | 0.78 (0.75, 0.81)*** | 0.85 (0.82, 0.88)*** |

| Number of visits to social clubs       |                      |                      |
|----------------------------------------|----------------------|----------------------|
| Quartile 1 (Low)                       | 1                    | 1                    |
| Quartile 2 (Low to Moderate)           | 0.75 (0.72, 0.78)*** | 0.86 (0.83, 0.90)*** |
| Quartile 3 (Moderate to High)          | 0.77 (0.74, 0.80)*** | 0.88 (0.84, 0.91)*** |
| Quartile 4 (High)                      | 0.95 (0.92, 0.98)**  | 1.01 (0.97, 1.04)    |
| Number of people that can be relied on |                      |                      |
| Quartile 1 (Low)                       | 1                    | 1                    |
| Quartile 2 (Low to Moderate)           | 0.58 (0.56, 0.61)*** | 0.66 (0.63, 0.68)*** |
| Quartile 3 (Moderate to High)          | 0.48 (0.47, 0.50)*** | 0.56 (0.54, 0.58)*** |
| Quartile 4 (High)                      | 0.36 (0.34, 0.38)*** | 0.44 (0.42, 0.46)*** |

\* p < 0.05; \*\* p < 0.01; \*\*\* p < 0.001

Model 1: Multilevel logit regression, adjusted for age and gender

Model 2: Model 1 + social interactions

Model 3: Model 2 + other individual-level variables, neighbourhood affluence and geographical remoteness

Figure 2 illustrates the ethnic and country of birth group differences in own-group ethnic density. Regardless of whether participants were born in Australia or the UK, those identifying as Australian (32.6%) or English (35.1%) ethnicities lived in the most ethnically dense neighbourhoods. Compared to the Australians and the English, the clustering of other ethnic groups in NSW was much lower. The highest mean ethnic density for non-Australian and non-English groups was for the Chinese born in China at 14.9%, whereas the lowest was for Australian born Swiss at 0.1%. There was evidence of heterogeneity of mean ethnic density within some groups. For example, Italians born in Australia had a mean of ethnic density of 4.9% but Italian-born Italians had 7.7%. Similar patterns were observed for Greeks, the Chinese and the Lebanese.

<Figure 2 here>

**For the next stage of analysis we investigated the level of association with own-group ethnic density. This necessitated stratification of the sample by ethnic and country of birth group to match each individual with the relevant ethnic density measure.** For example, Chinese ethnic density was matched to Chinese individuals (irrespective of whether they were born in China or Australia). We conducted these analyses for all groups, but due to space constraints, we focus our report on groups that have a mean ethnic density of 2% or more: Australians, English, Scottish, Irish, German, Italian, Greek, Lebanese, and Chinese. **Table 3 reports mostly weak and positive or null (i.e. p>0.05) correlations between own group ethnic density and each of the social interactions variables. The most consistent set of correlations were for the social interactions variable which indicated how many people could be relied on within a one-hour travel-time.**





|                           |                      |                      |                     |
|---------------------------|----------------------|----------------------|---------------------|
| Australian, Australia     | 1.01 (1.01, 1.01)*** | 1.01 (1.01, 1.01)*** | 1.00 (1.00, 1.00)   |
| Australian, not Australia | 0.97 (0.96, 0.99)*** | 0.98 (0.96, 0.99)**  | 0.97 (0.95, 0.99)** |
| English, Australia        | 1.00 (1.00, 1.00)    | 1.00 (1.00, 1.00)    | 1.00 (0.99, 1.00)   |
| English, UK               | 0.99 (0.99, 1.00)*   | 0.99 (0.99, 1.00)*   | 0.99 (0.99, 1.00)*  |
| Scottish, Australia       | 0.97 (0.94, 1.00)*   | 0.98 (0.95, 1.01)    | 0.99 (0.96, 1.01)   |
| Scottish, UK              | 0.98 (0.91, 1.06)    | 0.99 (0.92, 1.07)    | 1.00 (0.93, 1.08)   |
| Irish, Australia          | 0.98 (0.96, 0.99)**  | 0.98 (0.97, 1.00)**  | 1.00 (0.98, 1.01)   |
| Irish, Ireland            | 0.94 (0.86, 1.03)    | 0.95 (0.86, 1.04)    | 0.97 (0.87, 1.07)   |
| German, Australia         | 0.99 (0.95, 1.03)    | 0.99 (0.95, 1.04)    | 1.00 (0.96, 1.04)   |
| German, Germany           | 1.00 (0.90, 1.11)    | 1.00 (0.90, 1.12)    | 1.00 (0.89, 1.12)   |
| Italian, Australia        | 0.99 (0.97, 1.01)    | 0.99 (0.98, 1.01)    | 1.01 (0.99, 1.03)   |
| Italian, Italy            | 1.00 (0.98, 1.01)    | 1.00 (0.99, 1.02)    | 1.00 (0.99, 1.02)   |
| Greek, Australia          | 0.98 (0.94, 1.02)    | 0.99 (0.95, 1.04)    | 1.01 (0.96, 1.05)   |
| Greek, Greece             | 1.01 (0.99, 1.03)    | 1.01 (0.99, 1.03)    | 1.01 (0.98, 1.03)   |
| Lebanese, Australia       | 1.01 (0.95, 1.07)    | 1.04 (0.98, 1.10)    | 0.98 (0.91, 1.06)   |
| Lebanese, Lebanon         | 1.02 (1.00, 1.05)    | 1.02 (1.00, 1.05)    | 1.01 (0.98, 1.04)   |
| Chinese, Australia        | 0.90 (0.81, 0.99)*   | 0.86 (0.76, 0.97)*   | 0.88 (0.70, 1.12)   |
| Chinese, China            | 1.00 (0.99, 1.01)    | 1.00 (0.99, 1.01)    | 1.00 (0.99, 1.01)   |

\*\*\*  $p < 0.05$ ; \*\*  $p < 0.01$ ; \*  $p < 0.05$

Model 1: Adjusted for age and gender

Model 2: Model 1 + social interactions

Model 3: Model 2 + individual characteristics, neighbourhood affluence and geographical remoteness

## DISCUSSION

This paper examined the relationship between ethnic density and psychological distress in one of the most ethnic diverse areas of Australia. We found substantive heterogeneity in the risk of psychological distress between and within ethnic groups. Ethnic differences in social interactions, individual and neighbourhood characteristics did not explain the ethnic differences in the risk of psychological distress. More social interactions were associated with a lower risk of psychological distress, especially the number of people study participants felt they could rely on. Increasing own-group ethnic density was associated more social interactions and less psychological distress for some ethnic groups, but not all. However, it was the characteristics of individuals and the neighbourhoods in which they lived, not the social interactions, which **mostly** explained the ethnic density effects on psychological distress. Only the English born in the UK and the overseas-born Australians appeared to benefit from ethnic density after controlling for all other characteristics.

Although there are many studies on ethnic density and mental health<sup>4 6 10-18</sup>, only two others have tested whether this relationship is explained by social interactions. A UK study<sup>10</sup> found a lower risk of common mental disorders for the Irish and for the Bangladeshi groups they studied in more ethnically dense neighbourhoods. This was not fully explained by measures of practical and emotional social support. Contrary to the ethnic density hypothesis, this study also reported significantly higher risk of common mental disorders among white British in ethnically dense neighbourhoods. A study in the US<sup>11</sup> also showed the benefits of living in a higher own-ethnic group

1  
2  
3 density neighbourhoods for the emotional well-being of Black and Hispanic groups. Measures of  
4 personal and neighbourhood social support partially explained the relationship for Blacks but not  
5 among Hispanics. Therefore, despite using contrasting measures of mental health and social  
6 interactions for different ethnic groups in the UK, US and Australia, our findings are consistent  
7 wherein social interactions only played a weak role in explaining the ethnic density effect on mental  
8 health.  
9

10  
11 A particular strength of our study includes the large sample sizes for many different ethnic groups;  
12 more than has been possible to analyse in previous studies<sup>4</sup>. This allowed stratification by country  
13 of birth, which afforded new insights into the heterogeneity of mental health, social interactions and  
14 ethnic density within groups. **It is noteworthy that levels of ethnic density varied considerably by  
15 country of birth within some ethnic groups (e.g. the Chinese), though not all (e.g. the English).  
16 Given the general supposition that higher levels of ethnic density are better for mental health, it  
17 could be argued that for many groups, levels of ethnic density do not achieve a sufficient  
18 concentration necessary for health promotion in this sample. This hypothesis is not convincing,  
19 however, when one considers that no association between ethnic density and psychological  
20 distress was found for the Chinese born in China, who reported a mean ethnic density of  
21 approximately 15% and a maximum of nearly 80%, but there was an association among the  
22 Chinese born in Australia, for whom the mean ethnic density was about 5% and a maximum of  
23 around 63%. Likewise, there appeared to be a benefit of ethnic density for the UK-born English,  
24 but not the English born in Australia, despite having very similar levels of own-group ethnic  
25 density. As such, it would appear that a more nuanced approach may be required in future, using  
26 other sources of administrative data and qualitative methods to examine what it is about  
27 ethnically dense neighbourhoods which promote better mental health in some ethnic groups, but  
28 not all.**  
29  
30  
31  
32  
33

34 Our measures of psychological distress and social interactions have been widely validated. The small  
35 geographical scale (CCD) used to construct ethnic density provided a more accurate description of  
36 local circumstances than previous work which has relied upon larger spatial scales, helping to  
37 identify small 'pockets' of ethnic density and affluence that would otherwise have been hidden<sup>45</sup>.  
38 **The focus on small scale geography is an advantage, though our study shares a common limitation  
39 among others of this genre in the reliance upon administrative boundaries, which are unlikely to  
40 perfectly correlate with residents' perceptions of neighbourhood<sup>46</sup>.**  
41  
42  
43

44 **It is reasonable to expect that social support from the neighbourhood would be reflected in the  
45 four measures of social interactions used in the study, albeit imperfectly. Social clubs attended,  
46 for example, may be located in the neighbourhood and many of the people who can be relied on  
47 within one hour of travel may in fact live much closer. The limitation, however, is that the  
48 questions used in the 45 and Up Study did not ask participants to distinguish how much of these  
49 interactions occurred within versus outside the neighbourhood in which they lived. It would be  
50 useful for further work, therefore, to examine indicators which specify neighbourhood parameters  
51 within the question.** Another limitation was that the 45 and Up Study was sampled from the  
52 Medicare Australia database which mainly includes Australian citizens and migrants on permanent  
53 residency visas. Only some migrants on temporary visas are included on this scheme and this is likely  
54 to mean that some ethnic minorities were not represented in our study. **Representativeness is also  
55 a concern for a dataset wherein the response rate was only 18%, although comparisons between**  
56  
57  
58  
59  
60

1  
2  
3 the 45 and Up Study and a 'representative' dataset have helped to alleviate these concerns to  
4 some extent<sup>26</sup>. The 45 and Up Study asked participants about Aboriginal and Torres Strait  
5 Islander origin, though responses to this variable were not available for this investigation and are  
6 the focus of a follow-up study. Many studies have suggested that spatial variation in the  
7 experiences of racism could help to explain the ethnic density effect<sup>14,16</sup>. Although we had no  
8 measure of racism in our study, virtually all benefits of ethnic density were already explained by  
9 other individual characteristics. Finally, our study represents only people 45 years and older, so it  
10 cannot discount the possibility of different patterns for younger age groups.  
11  
12

## 13 14 15 16 CONCLUSION

17  
18 Ethnic groups in New South Wales, Australia, experience substantively different risks of  
19 psychological distress. These differences also align by country of birth, though there is no consistent  
20 pattern. Increasing social interactions, particularly those which help people to develop relationships  
21 with others they can depend on in times of need, are beneficial for mental health regardless of  
22 ethnicity and country of birth. In comparison, the ethnic density of where people live was protective  
23 only for the UK-born English and the overseas-born Australians.  
24  
25

## 26 27 28 ACKNOWLEDGEMENTS, COMPETING INTERESTS & FUNDING

29  
30 We thank all of the men and women who participated in the 45 and Up Study. The 45 and Up Study  
31 is managed by the Sax Institute in collaboration with major partner Cancer Council New South Wales;  
32 and partners the Heart Foundation (NSW Division); NSW Ministry of Health; *beyondblue: the*  
33 *national depression initiative*; Ageing, Disability and Home Care, NSW Family and Community  
34 Services; and the Australian Red Cross Blood Service. We acknowledge the use of 2006 census and  
35 boundary data provided by the Australian Bureau of Statistics. To preserve the anonymity of  
36 participants in The 45 and Up Study, some parameters of the Census Collector District (CCD) level  
37 data cannot be reported. This location-indexing data from the 45 and up Study is highly restricted  
38 access and will be made available only through SURE (<https://www.sure.org.au/>).  
39  
40

41  
42 The authors have no competing interests.

43  
44 No funding was sought for this study.  
45  
46

## 47 48 LIST OF FIGURES

49  
50 **Figure 1: Ethnic and country of birth differences in the rate of psychological distress (Kessler scores of 22 and over),**  
51 **adjusted for age and gender**

52  
53 **Figure 2: Ethnic and country of birth differences in mean own-group ethnic density (percentage) at the Census Collection**  
54 **District (CCD) scale, with minimum and maximum: sorted highest to lowest**  
55  
56  
57  
58  
59  
60

## REFERENCES

1. Vega W, Rumbaut R. Ethnic minorities and mental health. *Annual Review of Sociology* 1991;17:351-83.
2. Nazroo JY. Ethnicity and Mental Health: Findings from a National Community Survey. London: Policy Studies Institute, 1997.
3. Sproston K, Nazroo J. *Ethnic Minority Psychiatric Illness Rates in the Community (EMPIRIC)*. London: TSO, 2002.
4. Shaw RJ, Atkin K, Bécares L, Albor CB, Stafford M, Kiernan KE, et al. Impact of ethnic density on adult mental disorders: narrative review. *The British Journal of Psychiatry* 2012;201(1):11-19.
5. Paradies Y. A systematic review of empirical research on self-reported racism and health. *International Journal of Epidemiology* 2006;35:888-901.
6. Pickett K, Wilkinson R. People like us: ethnic group density effects on health. *Ethnicity and Health* 2008;13(4):321-34.
7. Letki N. Does diversity erode social cohesion? Social capital and race in British neighbourhoods. *Political Studies* 2008;56(1):99-126.
8. Twigg L, Taylor J, Mohan J. Diversity or disadvantage? Putnam, Goodhart, ethnic heterogeneity, and collective efficacy. *Environment and Planning A* 2010;42(6):1421-38.
9. Bécares L, Stafford M, Laurence J, Nazroo J. Composition, Concentration and Deprivation Exploring their Association with Social Cohesion among Different Ethnic Groups in the UK. *Urban Studies* 2011;48(13):2771-87.
10. Das-Munshi J, Becares L, Dewey ME, Stansfeld SA, Prince MJ. Understanding the effect of ethnic density on mental health: multi-level investigation of survey data from England. *BMJ: British Medical Journal* 2010;341.
11. Yuan ASV. Racial composition of neighborhood and emotional well-being. *Sociological Spectrum* 2007;28(1):105-29.
12. Pickett KE, Shaw RJ, Atkin K, Kiernan KE, Wilkinson RG. Ethnic density effects on maternal and infant health in the Millennium Cohort Study. *Social Science & Medicine* 2009;69(10):1476-83.
13. Becares L, Nazroo J, Jackson J, Heuvelman H. Ethnic density effects on health and experienced racism among Caribbean people in the US and England: A cross-national comparison. *Social Science & Medicine* 2012.
14. Becares L, Nazroo J, Stafford M. The buffering effects of ethnic density on experienced racism and health. *Health & Place* 2009;15(3):670-8.
15. Stafford M, Becares L, Nazroo J. Objective and Perceived Ethnic Density and Health: Findings From a United Kingdom General Population Survey. *American Journal of Epidemiology* 2009;170(4):484-93.
16. Astell-Burt T, Maynard MJ, Lenguerrand E, Harding S. Racism, ethnic density and psychological well-being through adolescence: evidence from the Determinants of Adolescent Social well-being and Health longitudinal study. *Ethnicity and Health* 2012;17:71-87.
17. Gieling M, Vollebergh W, van Dorsselaer S. Ethnic density in school classes and adolescent mental health. *Soc Psychiatry Psychiatr Epidemiol* 2009.
18. Xue Y, Leventhal T, Brooks-Gunn J, Earls F. Neighborhood residence and mental health problems of 5-to 11-year-olds. *Archives of General Psychiatry* 2005;62(5):554.
19. Australian Bureau of Statistics. *A Picture of the Nation: The Statistician's Report on the 2006 Census*. Canberra: Australian Government, 2006.
20. Anikeeva O, Bi P, Hiller JE, Ryan P, Roder D, Han GS. The Health Status of Migrants in Australia: A Review. *Asia-Pacific Journal of Public Health* 2010;22(2):159-93.
21. Thorburn A. Prevalence of obesity in Australia. *Obesity reviews* 2005;6(3):187-89.
22. Johnston R, Forrest J, Poulsen M. Sydney's ethnic geography: new approaches to analysing patterns of residential concentration. *Australian Geographer* 2001;32(2):149-62.

- 1
- 2
- 3 23. Poulsen M, Johnston R, Forrest J. Is Sydney a divided city ethnically? *Australian geographical studies* 2004;42(3):356-77.
- 4
- 5 24. Dunn KM. Rethinking ethnic concentration: the case of Cabramatta, Sydney. *Urban Studies*
- 6 1998;35(3):503-27.
- 7
- 8 25. Banks E, Redman S, Jorm L, Armstrong B, Bauman A, Beard J, et al. Cohort profile: the 45 and up
- 9 study. *International Journal of Epidemiology* 2008;37(5):941.
- 10
- 11 26. Mealing NM, Banks E, Jorm LR, Steel DG, Clements MS, Rogers KD. Investigation of relative risk
- 12 estimates from studies of the same population with contrasting response rates and designs.
- 13 *BMC medical research methodology* 2010;10(1):26.
- 14
- 15 27. Kessler RC, Andrews G, Colpe LJ, Hiripi E, Mroczek DK, Normand SL, et al. Short screening scales
- 16 to monitor population prevalences and trends in non-specific psychological distress.
- 17 *Psychological Medicine* 2002;32:959-76.
- 18
- 19 28. Furukawa TA, Kessler RC, Slade T, Andrews G. The performance of the K6 and K10 screening
- 20 scales for psychological distress in the Australian National Survey of Mental Health and Well-
- 21 Being. *Psychological Medicine* 2003;33(2):357-62.
- 22
- 23 29. Breslau J, Aguilar-Gaxiola S, Kendler KS, Su M, Williams D, Kessler RC. Specifying race-ethnic
- 24 differences in risk for psychiatric disorder in a USA national sample. *Psychological Medicine*
- 25 2006;36(1):57-68.
- 26
- 27 30. Carrà G, Sciarini P, Segagni-Lusignani G, Clerici M, Montomoli C, Kessler R. Do they actually work
- 28 across borders? Evaluation of two measures of psychological distress as screening
- 29 instruments in a non Anglo-Saxon country. *European Psychiatry* 2011;26(2):122-27.
- 30
- 31 31. Furukawa TA, Kawakami N, Saitoh M, Ono Y, Nakane Y, Nakamura Y, et al. The performance of
- 32 the Japanese version of the K6 and K10 in the World Mental Health Survey Japan.
- 33 *International journal of methods in psychiatric research* 2008;17(3):152-58.
- 34
- 35 32. Australian Bureau of Statistics. *Information paper: use of the Kessler Psychological Distress Scale*
- 36 *in ABS Health Surveys, Australia*. Canberra: Australian Bureau of Statistics, 2003.
- 37
- 38 33. Banks E, Byles JE, Gibson RE, Rodgers B, Latz IK, Robinson IA, et al. Is psychological distress in
- 39 people living with cancer related to the fact of diagnosis, current treatment or level of
- 40 disability? Findings from a large Australian study. *Medical Journal of Australia*
- 41 2010;193(5):92.
- 42
- 43 34. Byles JE, Gallienne L, Blyth FM, Banks E. Relationship of age and gender to the prevalence and
- 44 correlates of psychological distress in later life. *International Psychogeriatrics* 2012;1(1):1-10.
- 45
- 46 35. George ES, Jorm L, Kolt GS, Bambrick HJ, Lujic S. Physical Activity and Psychological Distress in
- 47 Older Men: Findings From the New South Wales 45 and Up Study. *Journal of Aging and*
- 48 *Physical Activity* 2012;20:300-16.
- 49
- 50 36. Koenig HG, Westlund RE, George LK, Hughes DC, Blazer DG, Hybels C. Abbreviating the Duke
- 51 Social Support Index for use in chronically ill elderly individuals. *Psychosomatics* 1993;34:61-
- 52 69.
- 53
- 54 37. Howe C, Matthews LR, Heard R. Work to retirement: a snapshot of psychological health in a
- 55 multicultural Australian population. *Work* 2010;36:119-27.
- 56
- 57 38. Pachana NA, Smith N, Watson M, McLaughlin D, Dobson A. Responsiveness of the Duke Social
- 58 Support sub-scales in older women. *Age & Ageing* 2008;37:666-72.
- 59
- 60 39. Chiew M, Weber M, Egger S, Sitas F. A cross-sectional exploration of smoking status and social
- interaction in a large population-based Australian cohort. *Social Science & Medicine*
- 2012;75(1):77-86.
40. Australian Bureau of Statistics. 2006 Census Geographies: Census Collector District. Canberra,
- 2012.
41. Australian Bureau of Statistics. *Research Paper. Socio-Economic Indexes for Areas: Introduction,*
- Use and Future Directions*. Canberra: ABS, 2006.
42. Trewin D. Socio-Economic Indexes for Areas (SEIFA). *Canberra, Australia: Australian Bureau of*
- Statistics* 2001.

- 1
- 2
- 3 43. Australian Population and Migration Research Centre. ARIA (Accessibility/Remoteness Index of
- 4 Australia): The University of Adelaide, 2012.
- 5 44. Leyland AH, Goldstein H. *Multilevel modelling of health statistics*: Wiley, 2001.
- 6 45. Exeter D, Flowerdew R, Boyle P. Policy implications of pockets of deprivation in Scotland. *GIS and*
- 7 *Evidence-Based Policy Making* 2007:95.
- 8 46. Flowerdew R, Manley DJ, Sabel CE. Neighbourhood effects on health: Does it matter where you
- 9 draw the boundaries? *Social Science & Medicine* 2008.
- 10
- 11
- 12
- 13
- 14
- 15
- 16
- 17
- 18
- 19
- 20
- 21
- 22
- 23
- 24
- 25
- 26
- 27
- 28
- 29
- 30
- 31
- 32
- 33
- 34
- 35
- 36
- 37
- 38
- 39
- 40
- 41
- 42
- 43
- 44
- 45
- 46
- 47
- 48
- 49
- 50
- 51
- 52
- 53
- 54
- 55
- 56
- 57
- 58
- 59
- 60

For peer review only

1  
2  
3  
4  
5  
6  
7  
8  
9  
10  
11  
12  
13  
14  
15  
16  
17  
18  
19  
20  
21  
22  
23  
24  
25  
26  
27  
28  
29  
30  
31  
32  
33  
34  
35  
36  
37  
38  
39  
40  
41  
42  
43  
44  
45  
46  
47  
48  
49  
50  
51  
52  
53  
54  
55  
56  
57  
58  
59  
60

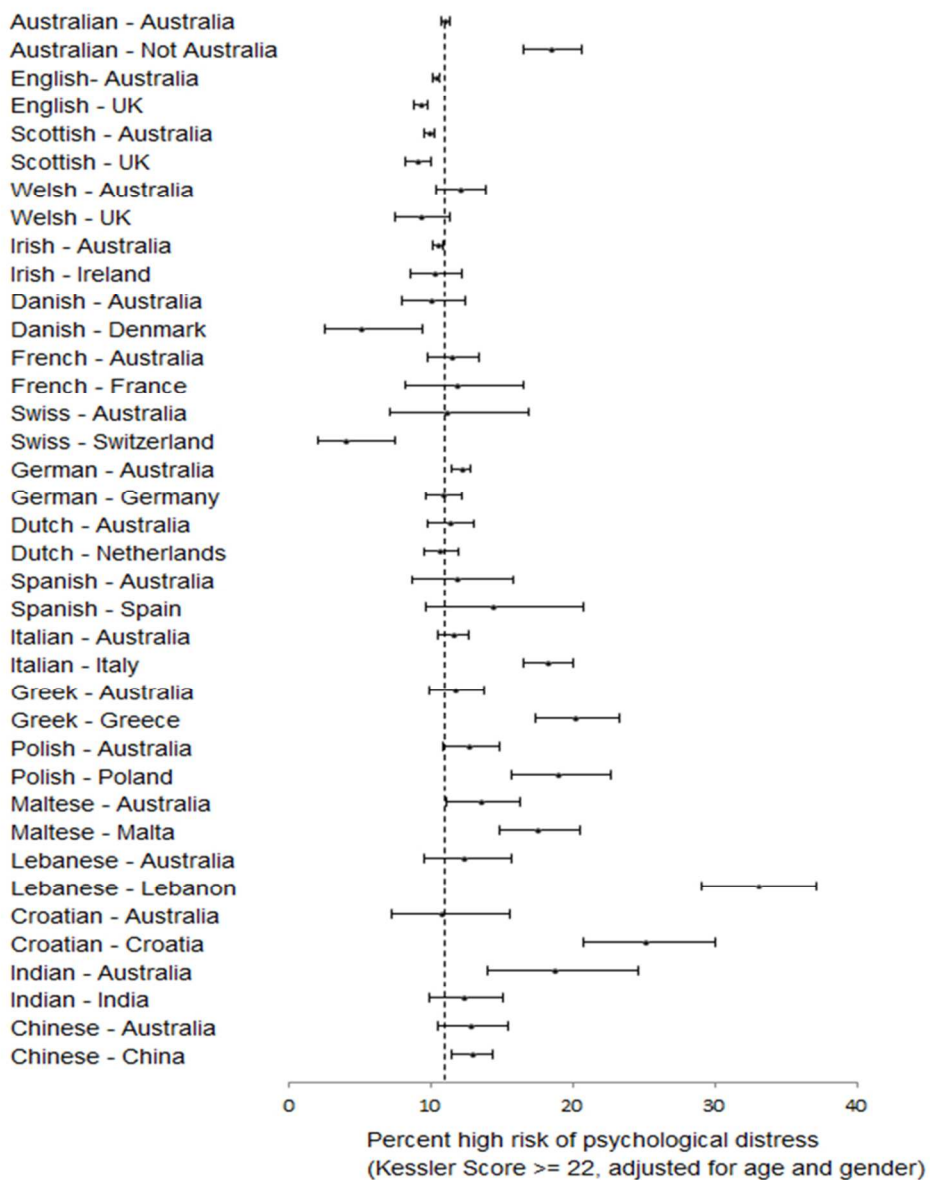

Ethnic and country of birth differences in the rate of psychological distress (Kessler scores of 22 and over), adjusted for age and gender  
154x212mm (150 x 129 DPI)



1  
2  
3  
4  
5  
6  
7  
8  
9  
10  
11  
12  
13  
14  
15  
16  
17  
18  
19  
20  
21  
22  
23  
24  
25  
26  
27  
28  
29  
30  
31  
32  
33  
34  
35  
36  
37  
38  
39  
40  
41  
42  
43  
44  
45  
46  
47  
48  
49  
50  
51  
52  
53  
54  
55  
56  
57  
58  
59  
60



Ethnic and country of birth differences in mean own-group ethnic density (percentage) at the Census Collection District (CCD) scale, with minimum and maximum: sorted highest to lowest  
 254x179mm (96 x 96 DPI)

Review only

STROBE Statement—Checklist of items that should be included in reports of *cross-sectional studies*

|                           | Item No | Recommendation                                                                                                                  | Author comment and page number                                                                                                  |
|---------------------------|---------|---------------------------------------------------------------------------------------------------------------------------------|---------------------------------------------------------------------------------------------------------------------------------|
| <b>Title and abstract</b> | 1       | (a) Indicate the study's design with a commonly used term in the title or the abstract                                          | We have indicated in the title that this is a cross-sectional study. (see page 1)                                               |
|                           |         | (b) Provide in the abstract an informative and balanced summary of what was done and what was found                             | We have provided a structured abstract in line with JECH recommendations. (see page 1)                                          |
| <b>Introduction</b>       |         |                                                                                                                                 |                                                                                                                                 |
| Background/rationale      | 2       | Explain the scientific background and rationale for the investigation being reported                                            | We have explained the scientific background and rationale for the study in a two-paragraph introduction. (see page2)            |
| Objectives                | 3       | State specific objectives, including any prespecified hypotheses                                                                | We outline the objective of the study in the second paragraph of the introduction, see page2.                                   |
| <b>Methods</b>            |         |                                                                                                                                 |                                                                                                                                 |
| Study design              | 4       | Present key elements of study design early in the paper                                                                         | The study design is outlined in the first paragraph of the methods section, see page 2.                                         |
| Setting                   | 5       | Describe the setting, locations, and relevant dates, including periods of recruitment, exposure, follow-up, and data collection | The setting is outlined in the second paragraph of the introduction and the first paragraph of the methods section, see page 2. |
| Participants              | 6       | (a) Give the eligibility criteria, and the sources and methods of selection of participants                                     | Eligibility criteria and the selection of participant is discussed in paragraph 1 and 2                                         |

|                              |    |                                                                                                                                                                                      |                                                                                                                                                                                                                                                                                                          |
|------------------------------|----|--------------------------------------------------------------------------------------------------------------------------------------------------------------------------------------|----------------------------------------------------------------------------------------------------------------------------------------------------------------------------------------------------------------------------------------------------------------------------------------------------------|
|                              |    |                                                                                                                                                                                      | of the method section, see page 2 and 3                                                                                                                                                                                                                                                                  |
| Variables                    | 7  | Clearly define all outcomes, exposures, predictors, potential confounders, and effect modifiers. Give diagnostic criteria, if applicable                                             | All variables are discussed in paragraphs 2-8 of the method section, see page 2-4                                                                                                                                                                                                                        |
| Data sources/<br>measurement | 8* | For each variable of interest, give sources of data and details of methods of assessment (measurement). Describe comparability of assessment methods if there is more than one group | The primary source of data is the 45 and Up Study and this outlined in the first paragraph of the method section, see page 2. Details of measurement are provided separately for the outcome variable (psychological distress), other individual variables and neighbourhood level measures, see page 3. |
| Bias                         | 9  | Describe any efforts to address potential sources of bias                                                                                                                            | Sources of bias were discussed in the paragraph headed 'statistical analysis', see page 4. This focuses on adjustment for confounders and for the hierarchical data structure through the use of multilevel models.                                                                                      |
| Study size                   | 10 | Explain how the study size was arrived at                                                                                                                                            | Study size has been explained in paragraph 1 and 2 of the method section, see page 2 & 3                                                                                                                                                                                                                 |
| Quantitative variables       | 11 | Explain how quantitative variables were handled in the analyses. If applicable, describe which groupings were chosen and why                                                         | All variables have been outlined in the method section, see page 3 & 4 for details.                                                                                                                                                                                                                      |
| Statistical methods          | 12 | (a) Describe all statistical methods, including those used to                                                                                                                        | All methods have                                                                                                                                                                                                                                                                                         |

|                   |     |                                                                                                                                                                                                              |                                                                                                                                    |
|-------------------|-----|--------------------------------------------------------------------------------------------------------------------------------------------------------------------------------------------------------------|------------------------------------------------------------------------------------------------------------------------------------|
|                   |     | control for confounding                                                                                                                                                                                      | been described in                                                                                                                  |
|                   |     | (b) Describe any methods used to examine subgroups and interactions                                                                                                                                          | the section headed ‘statistical                                                                                                    |
|                   |     | (c) Explain how missing data were addressed                                                                                                                                                                  | analysis’, see page                                                                                                                |
|                   |     | (d) If applicable, describe analytical methods taking account of sampling strategy                                                                                                                           | 4. Explanation on how missing data                                                                                                 |
|                   |     | (e) Describe any sensitivity analyses                                                                                                                                                                        | were addressed in paragraph 2 of the method section, see page 3.                                                                   |
| <b>Results</b>    |     |                                                                                                                                                                                                              |                                                                                                                                    |
| Participants      | 13* | (a) Report numbers of individuals at each stage of study—eg numbers potentially eligible, examined for eligibility, confirmed eligible, included in the study, completing follow-up, and analysed            | Sample selection was described in paragraph 2 of the method section, see page 2 & 3.                                               |
|                   |     | (b) Give reasons for non-participation at each stage                                                                                                                                                         |                                                                                                                                    |
|                   |     | (c) Consider use of a flow diagram                                                                                                                                                                           |                                                                                                                                    |
| Descriptive data  | 14* | (a) Give characteristics of study participants (eg demographic, clinical, social) and information on exposures and potential confounders                                                                     | Characteristics of the study participants including sample sizes and prevalence of key                                             |
|                   |     | (b) Indicate number of participants with missing data for each variable of interest                                                                                                                          | outcome and explanatory variables are reported in paragraph 1-4 of the result section, see page 4 & 5, figure 1&2 and table 1 & 2. |
| Outcome data      | 15* | Report numbers of outcome events or summary measures                                                                                                                                                         |                                                                                                                                    |
| Main results      | 16  | (a) Give unadjusted estimates and, if applicable, confounder-adjusted estimates and their precision (eg, 95% confidence interval). Make clear which confounders were adjusted for and why they were included |                                                                                                                                    |
|                   |     | (b) Report category boundaries when continuous variables were categorized                                                                                                                                    |                                                                                                                                    |
|                   |     | (c) If relevant, consider translating estimates of relative risk into absolute risk for a meaningful time period                                                                                             |                                                                                                                                    |
| Other analyses    | 17  | Report other analyses done—eg analyses of subgroups and interactions, and sensitivity analyses                                                                                                               | Sub-group analysis is reported in paragraph 5 & 6 in the result section, see page 5 and table 3.                                   |
| <b>Discussion</b> |     |                                                                                                                                                                                                              |                                                                                                                                    |
| Key results       | 18  | Summarise key results with reference to study objectives                                                                                                                                                     | Key results are outlined briefly in paragraph 1 of the discussion section on page 6.                                               |
| Limitations       | 19  | Discuss limitations of the study, taking into account sources of potential bias or imprecision. Discuss both direction and                                                                                   | Strengths and limitations of the                                                                                                   |

|                          |    |                                                                                                                                                                            |                                                                                                                                        |
|--------------------------|----|----------------------------------------------------------------------------------------------------------------------------------------------------------------------------|----------------------------------------------------------------------------------------------------------------------------------------|
|                          |    | magnitude of any potential bias                                                                                                                                            | study are discussed in paragraph 3 of the discussion section, see page 6 & 7.                                                          |
| Interpretation           | 20 | Give a cautious overall interpretation of results considering objectives, limitations, multiplicity of analyses, results from similar studies, and other relevant evidence | Interpretation of the findings within the context of the previous literature is reported in paragraph 2 of the discussion, see page 6. |
| Generalisability         | 21 | Discuss the generalisability (external validity) of the study results                                                                                                      |                                                                                                                                        |
| <b>Other information</b> |    |                                                                                                                                                                            |                                                                                                                                        |
| Funding                  | 22 | Give the source of funding and the role of the funders for the present study and, if applicable, for the original study on which the present article is based              | No funding was sought for this study.                                                                                                  |

\*Give information separately for exposed and unexposed groups.

**Note:** An Explanation and Elaboration article discusses each checklist item and gives methodological background and published examples of transparent reporting. The STROBE checklist is best used in conjunction with this article (freely available on the Web sites of PLoS Medicine at <http://www.plosmedicine.org/>, Annals of Internal Medicine at <http://www.annals.org/>, and Epidemiology at <http://www.epidem.com/>). Information on the STROBE Initiative is available at [www.strobe-statement.org](http://www.strobe-statement.org).

1  
2  
3 **Do social interactions explain ethnic differences in psychological distress and the protective effect**  
4 **of local ethnic density? Evidence from a cross-sectional study of 226,487 adults in middle-to-older**  
5 **age**  
6  
7

8  
9 **Xiaoqi Feng, PhD\* <sup>1</sup>**

10  
11 **Thomas Astell-Burt, PhD\* <sup>2,3</sup>**

12  
13 **Gregory S. Kolt, PhD <sup>2</sup>**  
14

15  
16  
17 \*Corresponding Author, Centre of Health Research, School of Medicine, University of Western  
18 Sydney, Locked Bag 1797, Penrith, NSW 2751, Australia. +61 2 4620 3951. X.Feng@uws.edu.au  
19

20 1 Centre of Health Research, School of Medicine, University of Western Sydney, Australia

21 2 School of Science and Health, University of Western Sydney, Australia

22 3 School of Geography and Geosciences, University of St Andrews, UK  
23

24  
25 **KEYWORDS**  
26

27 MENTAL HEALTH; ETHNICITY; MULTILEVEL MODELLING; PUBLIC HEALTH; SOCIAL EPIDEMIOLOGY  
28  
29

30  
31 **WORD COUNT: 2721**  
32  
33

34  
35  
36 "The Corresponding Author has the right to grant on behalf of all authors and does grant on behalf of all authors,  
37 an exclusive licence (or non-exclusive for government employees) on a worldwide basis to the BMJ Group and  
38 co-owners or contracting owning societies (where published by the BMJ Group on their behalf), and its Licensees  
39 to permit this article (if accepted) to be published in Journal of Epidemiology and Community Health and any  
40 other BMJ Group products and to exploit all subsidiary rights, as set out in our licence."  
41  
42  
43  
44  
45  
46  
47  
48  
49  
50  
51  
52  
53  
54  
55  
56  
57  
58  
59  
60

1  
2  
3 **Do social interactions explain ethnic differences in psychological distress and the protective effect**  
4 **of local ethnic density? Evidence from a cross-sectional study of 226,487 adults in middle-to-older**  
5 **age**  
6  
7  
8

9  
10 **ABSTRACT**

11 **Background:** A frequently proposed, but under-researched hypothesis is that ethnic density benefits  
12 mental health through increasing social interactions. We examined this hypothesis in 226,487 adults  
13 from 19 ethnic groups aged 45 years and older in Australia.  
14

15 **Methods:** Multilevel logit regression was used to measure association between ethnicity, social  
16 interactions, own-group ethnic density and scores of 22+ on the Kessler scale of psychological  
17 distress. Self-reported ancestry was used as a proxy for ethnicity. Measures of social interactions  
18 included the number of times in the last week were: *i)* spent with friends or family participants did  
19 not live with; *ii)* talked to someone on the telephone; *iii)* attended meetings of social groups; and *iv)*  
20 how many people could be relied upon outside their home, but within one hour of travel. Per cent  
21 own-group ethnic density was measured at the Census Collection District scale.  
22  
23  
24

25 **Results:** Psychological distress was reported by 11% of Australians born in Australia. The risk of  
26 experiencing psychological distress varied among ethnic minorities and by country of birth (e.g. 33%  
27 for the Lebanese born in Lebanon, compared to 4% for the Swiss born in Switzerland). These  
28 differences remained after full adjustment. Social interactions varied between ethnic groups and  
29 were associated with lower psychological distress and ethnic density. Ethnic density was associated  
30 with reduced psychological distress for some groups. This association, however, was explained by  
31 individual and neighbourhood characteristics and not by social interactions.  
32  
33  
34

35 **Conclusion:** Social interactions are important correlates of mental health, but do not fully explain  
36 ethnic differences in psychological distress, nor the protective effect of own-group density.  
37  
38  
39

40  
41 **WHAT IS ALREADY KNOWN ON THIS SUBJECT?**

42 Ethnic differences in mental health, and the reportedly protective influence of own group ethnic  
43 density, are largely unexplained in previous studies. Social interactions are widely hypothesised as a  
44 mechanism linking ethnic density with more favourable mental health, and may also explain ethnic  
45 differences more generally. However, few studies have empirically tested these hypotheses.  
46  
47  
48

49 **WHAT THIS STUDY ADDS?**

50 In a large cohort of Australian adults in middle-to-older age, ethnic differences in mental health were  
51 not explained by four measures of social interactions. Protective associations between ethnic  
52 density and mental health were largely explained by individual-level socioeconomic characteristics,  
53 not social interactions.  
54  
55

56  
57 Do social interactions explain ethnic differences in psychological distress and the protective effect of  
58 local ethnic density? Evidence from a cross-sectional study of 226,487 adults in middle-to-older age  
59  
60

## SUMMARY

### Article Focus:

- Ethnic differences in mental health, and the reportedly protective influence of own group ethnic density, are largely unexplained in previous studies.
- Social interactions are widely hypothesised as a mechanism linking ethnic density with more favourable mental health, and may also explain ethnic differences more generally. However, few studies have empirically tested these hypotheses.
- We examined this hypothesis in 226,713 adults from 19 ethnic groups aged 45 years and older in Australia.

### Key Messages:

- Ethnic differences in mental health persisted after full adjustment; they were not explained by four measures of social interactions, or other individual and neighbourhood characteristics.
- Protective associations between ethnic density and mental health were largely explained by individual-level socioeconomic characteristics, not social interactions.

### Strengths and Limitations:

- Large samples allowed for stratification of ethnic groups to investigate differences in mental health, social interactions and ethnic density by country of birth
- The use of a very small geographical scale than in previous work allowed for the ascertainment of local 'pockets' of ethnic density, which would otherwise have been hidden if the study had been dependent upon larger spatial units
- Some of the remaining ethnic inequalities in mental health could be explained by systematic differences in the experience of racial discrimination which we were unable to control for



## INTRODUCTION

The existence of ethnic differences in mental health have long been reported, though not fully explained<sup>1-3</sup>. It has been suggested that living in areas of higher own group ethnic density reduces the risk of psychological distress, with increased social support hypothesised to be one of the primary drivers<sup>4</sup>. Social norms and support networks that promote resilience to material disadvantage and sources of psychosocial stress (e.g. racism<sup>5</sup>) are thought to be encouraged and maintained by this geographical clustering of ethnic groups<sup>6</sup>; even in deprived communities<sup>7-9</sup>. However, there is very little empirical evidence on the extent that increased social support explains why some groups tend to report better mental health in ethnically dense neighbourhoods.

Only two studies have been identified that have examined this proposition, one in the UK and another in the US, with equivocal results<sup>10,11</sup>. More broadly, studies of ethnic density and mental health have been mostly based upon adolescents and adults of child-bearing age in European and North American datasets<sup>10-18</sup>. Few studies have been conducted on adults in middle to older age, and no research has been conducted in Australia, which is surprising when one considers that, of the 22.6 million population, over one quarter were born outside Australia<sup>19</sup> and 50% of whom originated from non-English-speaking countries<sup>20</sup>.

Australian cities are some of the most ethnically diverse in the world<sup>21</sup> and often contain substantial residential clustering of ethnic groups<sup>22-24</sup>. Contrasting migration histories and residential patterns of ethnic groups means that one cannot assume association between ethnic density and mental health reported in Europe and North America generalises to the Australian context. Therefore, more research is required not only to further understand the mechanisms underlying ethnic density effects, but also to identify the extent that ethnic density may be beneficial to mental health in other ethnically diverse countries like Australia. In this paper we attempt to achieve both of these aims, in addition to an examination of ethnic differences in mental health and the role of social support more generally, through an analysis of a large number of ethnic groups and four measures of social interactions in an Australian cohort of adults.

## METHOD

### Study population

The 45 and Up study<sup>25</sup> is a large scale cohort of 267,151 residents aged 45 and over in New South Wales ('NSW', the most populous state in Australia). A baseline questionnaire covering a range of health and social issues was distributed to a random sample of adults listed in the Medicare Australia database between 2006 and 2009 inclusive. Medicare Australia is the database through which national healthcare is provided for Australian citizens and permanent residents, as well some temporary residents and refugees<sup>25</sup>. Response to the questionnaire was 18%, which is low, though previous research has suggested that results from the 45 and Up Study are broadly comparable to those derived from 'representative' samples<sup>26</sup>. The University of New South Wales Human Research Ethics Committee approved The 45 and Up Study. Further details including the baseline questionnaire are available to download from [www.45andUp.org.au](http://www.45andUp.org.au).

1  
2  
3 Ethnicity status was derived from the first (of up to two) responses to a question on self-reported  
4 ancestry ('*What is your ancestry?*'). Secondary responses to this question were not used in the  
5 definition of ethnicity as they were not available in our dataset. We focused on the 19 largest  
6 groups: Australian, English, Scottish, Welsh, Irish, Danish, French, Swiss, German, Dutch, Spanish,  
7 Italian, Greek, Polish, Maltese, Lebanese, Croatian, Indian, and Chinese. Large sample sizes allowed  
8 for stratification of each group by country of birth (assessed by the question '*in which country were*  
9 *you born?*') to address healthy-migrant effects. We retained all participants born in Australia  
10 (n=179,712), all participants of Australian ethnicity born outside Australia (n=1,336), and participants  
11 of non-Australian ethnic groups born in their ethnic-country of origin (n=33,739). Participants of  
12 non-Australian ethnic groups born elsewhere (i.e. not Australia or their ethnic-country of origin)  
13 were omitted from the sample (n=33,574) for substantive and practical reasons. Non-Australian  
14 ethnic groups born overseas and not in the ethnic-country of origin were heterogeneous by  
15 definition, which made it difficult to meaningfully interpret any results for to these participants.  
16 Furthermore, in practical terms, the sample sizes of many of these groups were small, which also  
17 reduced the potential to draw reliable statistical inference. We also omitted all participants missing  
18 a postcode identifier (n=263) and those missing a valid outcome measure (n=7,011). Missing data  
19 for independent variables was resolved via imputing the mean of the observed values, retaining an  
20 overall sample size of n=226,487.  
21  
22  
23  
24  
25  
26  
27

### 28 **Psychological distress**

29  
30 We used the Kessler Psychological Distress Scale (K10) to evaluate mental health status<sup>27 28</sup>. The K10  
31 measures symptoms of psychological distress experienced over the past four weeks, including  
32 feeling tired for no reason, nervous, hopeless, restless, depressed, sad and worthless. Participants  
33 had five choices for each of the ten questions (none of the time =1, a little of the time =2, some of  
34 the time =3, most of the time =4, all of the time=5) and these were summed to give the overall score.  
35 The K10 have been previously used to gauge levels of psychological distress across different  
36 countries and ethnic groups<sup>28-31</sup>. We constructed a binary variable wherein a score of 22 or more  
37 identified participants with a high risk of psychological distress<sup>32</sup>. The K10 has been used in this  
38 binary manner, with 22 as the cut-point, in previous published analyses of The 45 and Up Study<sup>33-35</sup>.  
39  
40  
41  
42  
43

### 44 **Other individual-level measures**

45  
46 Social interactions were measured using four questions from the shortened version of the Duke  
47 Social Support Index<sup>36</sup>. Three of the questions tested the number of times in the past week a  
48 participant: i) spent time with friends or family they did not live with; ii) talked to someone (friends,  
49 relatives or others) on the telephone; iii) attended meetings at social clubs or religious groups. The  
50 final question asked participants how many people outside their home, but within one hour travel-  
51 time, did they feel close to or could rely on. Previous work has constructed a composite indicator of  
52 social support from responses to these questions<sup>37 38</sup>, though we analysed each one separately in  
53 line with recent studies which have demonstrated that some are more important than others<sup>39</sup>.  
54  
55  
56  
57  
58  
59  
60

We also accounted for other individual-level variables (self-reported) which are known to correlate with mental health. These included: age, gender, physical activity, smoking status, Body Mass Index (BMI), highest educational qualifications, economic status, annual household income, couple status, and whether language(s) other than English were spoken at home.

### Neighbourhood-level measures

This study used Census Collection Districts (CCD) to define neighbourhoods. With a mean of 225 residents<sup>40</sup>, CCDs were the smallest geographical scale for which 2006 Census data was made available<sup>41</sup>. However, 9% of participants in The 45 and Up Study were missing a valid CCD. As nearly 100% had a postcode identifier, we assigned those missing a CCD with a pseudo-CCD according to the location of the population-weighted postcode centroid. Therefore, 100% of the sample could be assigned neighbourhood measures and clustering within regression models could be operationalized at the CCD level.

We constructed the measure of own-group ethnic density from 2006 Census data. The Census question on ancestry (a surrogate for ethnicity in our study) was very similar to that used in the 45 and Up Study ("What is the person's ancestry?"). The number of people within a CCD pertaining to each participant's ethnic group was divided the total usual resident population. For example, Chinese participants (regardless of their country of birth) were assigned the percentage of the population in their CCD who self-identified as Chinese.

Other neighbourhood measures included local affluence and geographical remoteness. We used the Socio-Economic Index for Areas (SEIFA) 'Index of Relative Socio-Economic Advantage/Disadvantage'<sup>42</sup> to measure local affluence. This is a variable derived by the Australian Bureau of Statistics (ABS) using Census variables which relate to advantage and disadvantage, including household income and educational qualifications. This indicator was expressed in percentiles; higher percentiles indicate more affluent areas. Geographical remoteness was measured using the 'Accessibility/Remoteness Index of Australia' (ARIA)<sup>43</sup>. ARIA is a score ranging from 0 to 15, with scores of 2.4 and over used to distinguish between urban and inner regions (<2.4) and rural or remote (>=2.4).

### Statistical analysis

The study population was first assessed using descriptive statistics. Measures of ethnic density were mapped across NSW. To investigate ethnic differences in psychological distress, multilevel logistic regression was used to account for the clustering of participants within CCDs<sup>44</sup>. The sample was clustered within 11,621 CCDs (20 participants per CCD on average). CCDs accounted for 3.3% of the variation in psychological distress within a 'null' two-level multilevel model. A categorical variable identifying ethnic groups stratified by country of birth was fitted in this model, which was then adjusted for age and gender. We proceeded to test whether any ethnic differences in psychological distress remained significant after controlling for social interactions, other individual-level variables, local affluence and geographical remoteness. Multilevel logit regression was fitted to ethnic and country of birth-specific groups (i.e. stratified models) to investigate association between psychological distress and own-group ethnic density. To assess whether these associations could be

1  
2  
3 explained by social interactions, we first tested the extent of correlation between each measure and  
4 own-group ethnic density using negative-binomial regression (to account for the skewed distribution  
5 of the social interaction variables). Social interactions were then fitted into the logit models,  
6 followed by individual-level variables, local affluence and geographical remoteness. Interaction  
7 terms were fitted to test for potential synergistic effects between ethnic density and other  
8 neighbourhood variables. Statistically significant associations were identified using the log-  
9 likelihood ratio test ( $p < 0.05$ ). All analyses were conducted in STATA 12.  
10  
11

## 12 13 14 **RESULTS**

15  
16 Figure 1 reports differences in the age- and gender-adjusted prevalence of psychological distress by  
17 ethnicity and country of birth. The rate of high psychological distress was 11% for Australians born in  
18 Australia. In comparison, this risk was far higher for some groups, for example, 33% for the Lebanese  
19 born in Lebanon, but much lower for others, such as the Swiss born in Switzerland at 4%. There was  
20 no consistent effect of migrant status on the risk of psychological distress. For example, the  
21 prevalence of psychological distress among Croatians born in Croatia was 14.3% higher than their  
22 Australian born Croatian peers. In contrast, no substantive difference in the prevalence of  
23 psychological distress was reported among the Chinese, whether born in Australia (12.8%) or China  
24 (12.9%), and the Danish born in Australia had twice the risk of their Danish born contemporaries (10%  
25 to 5% respectively).  
26  
27  
28  
29  
30  
31  
32  
33

34 <Figure 1 here>  
35  
36  
37  
38  
39

40 Table 1 reports the percentage of each ethnic and country of birth group within the lowest quartile  
41 of the four social interactions measures. P-values for comparisons between ethnic and country of  
42 birth groups for each social interaction variable were calculated using logistic regression. Compared  
43 to their Australian-born peers, those born within their ethnic country of origin tended to be more  
44 prevalent in the lowest quartile of every measure of social interactions. For the variable denoting  
45 how many people a person felt they could rely on, within group differences were notably wide  
46 between the Australian-born and those born in the ethnic country of origin for the French (34.1%,  
47 52%), Polish (37.8%, 51%), Lebanese (26.2%, 45.7%) and Chinese (32.8%, 56.7%).  
48  
49  
50  
51  
52  
53  
54  
55  
56  
57  
58  
59  
60

**Table 1: Ethnic and country of birth differences in social interactions; percentage in the lowest quartile for each measure of social interactions**

| Ethnic group, country of birth | N (%)         | Social interactions                                  |                                       |                                          |                                 |
|--------------------------------|---------------|------------------------------------------------------|---------------------------------------|------------------------------------------|---------------------------------|
|                                |               | <i>Less likely to spend time with friends/family</i> | <i>Less likely to talk to someone</i> | <i>Less likely to go to social clubs</i> | <i>Few people can depend on</i> |
| Australia, Australia           | 61,848 (27.3) | 35.9 (35.51, 36.30)                                  | 26.1 (25.72, 26.45)                   | 42.1 (41.68, 42.51)                      | 30.5 (30.10, 30.88)             |
| Australian, Not Australia      | 1,383 (0.6)   | 37.9 (35.37, 40.54)                                  | 30.2 (27.85, 32.73)***                | 37.9 (35.37, 40.59)***                   | 36.7 (34.15, 39.28)***          |
| English, Australia             | 50,480 (22.3) | 35.6 (35.16, 36.03)                                  | 25.5 (25.06, 25.86)*                  | 41.3 (40.89, 41.80)*                     | 30.1 (29.64, 30.49)             |
| English, UK                    | 16,356 (7.2)  | 41.4 (40.66, 42.21)***                               | 28.5 (27.82, 29.24)***                | 43.9 (43.15, 44.73)***                   | 37.9 (37.17, 38.71)***          |
| Scottish, Australia            | 21,745 (9.6)  | 35.1 (34.47, 35.78)*                                 | 24.6 (24.06, 25.24)***                | 40.5 (39.86, 41.21)***                   | 29.2 (28.57, 29.81)***          |
| Scottish, UK                   | 3,759 (1.7)   | 37.8 (36.28, 39.43)*                                 | 27.8 (26.32, 29.23)*                  | 42.9 (41.28, 44.53)                      | 35.8 (34.26, 37.37)***          |
| Welsh, Australia               | 1,265 (0.6)   | 36.6 (33.99, 39.38)                                  | 25.0 (22.67, 27.51)                   | 40.3 (37.58, 43.11)                      | 30.0 (27.48, 32.58)             |
| Welsh, UK                      | 835 (0.4)     | 42.4 (39.06, 45.87)***                               | 28.9 (25.89, 32.12)                   | 44.6 (41.14, 48.05)                      | 38.0 (34.68, 41.35)***          |
| Irish, Australia               | 33,360 (14.7) | 35.0 (34.52, 35.58)**                                | 24.1 (23.58, 24.53)***                | 39.7 (39.20, 40.30)***                   | 30.4 (29.91, 30.94)             |
| Irish, Ireland                 | 1,048 (0.5)   | 40.9 (37.89, 43.92)***                               | 27.5 (24.90, 30.34)                   | 36.7 (33.71, 39.69)***                   | 36.3 (33.37, 39.25)***          |
| Danish, Australia              | 695 (0.3)     | 36.4 (32.84, 40.09)                                  | 24.7 (21.58, 28.11)                   | 37.7 (34.11, 41.46)*                     | 30.2 (26.88, 33.74)             |
| Danish, Denmark                | 178 (0.1)     | 49.0 (41.63, 56.43)***                               | 34.2 (27.55, 41.57)*                  | 55.3 (47.76, 62.56)***                   | 42.3 (35.15, 49.78)***          |
| French, Australia              | 1,195 (0.5)   | 37.9 (35.18, 40.77)                                  | 26.3 (23.78, 28.92)                   | 44.1 (41.20, 46.95)                      | 34.1 (31.46, 36.87)**           |
| French, France                 | 237 (0.1)     | 47.1 (40.76, 53.58)***                               | 29.9 (24.30, 36.10)                   | 53.4 (46.92, 59.85)***                   | 52.0 (45.51, 58.36)***          |
| Swiss, Australia               | 163 (0.1)     | 40.9 (33.48, 48.67)                                  | 23.5 (17.62, 30.70)                   | 49.7 (41.86, 57.48)                      | 34.5 (27.59, 42.20)             |
| Swiss, Switzerland             | 224 (0.1)     | 49.6 (43.01, 56.23)***                               | 35.8 (29.66, 42.36)***                | 51.1 (44.46, 57.77)***                   | 45.1 (38.62, 51.76)***          |
| German, Australia              | 9,894 (4.4)   | 36.1 (35.18, 37.11)                                  | 26.4 (25.49, 27.27)                   | 41.4 (40.41, 42.41)                      | 31.0 (30.12, 31.97)             |
| German, Germany                | 2,073 (0.9)   | 48.0 (45.82, 50.19)***                               | 35.4 (33.33, 37.54)***                | 50.6 (48.38, 52.79)***                   | 45.8 (43.63, 47.99)***          |
| Dutch, Australia               | 1,487 (0.7)   | 35.0 (32.61, 37.43)                                  | 27.8 (25.57, 30.11)                   | 41.6 (39.09, 44.15)                      | 31.2 (28.93, 33.65)             |
| Dutch, Netherlands             | 2,451 (1.1)   | 40.8 (38.88, 42.85)***                               | 30.7 (28.87, 32.57)***                | 42.4 (40.39, 44.43)                      | 37.7 (35.78, 39.68)***          |
| Spanish, Australia             | 316 (0.1)     | 40.8 (35.42, 46.36)                                  | 28.6 (23.72, 33.93)                   | 46.6 (41.05, 52.22)                      | 30.0 (25.15, 35.25)             |
| Spanish, Spain                 | 158 (0.1)     | 45.5 (37.82, 53.48)*                                 | 31.4 (24.55, 39.12)                   | 53.9 (45.89, 61.72)**                    | 47.3 (39.57, 55.25)***          |
| Italian, Australia             | 3,259 (1.4)   | 35.5 (33.88, 37.18)                                  | 25.8 (24.33, 27.34)                   | 41.2 (39.49, 42.93)                      | 32.0 (30.42, 33.66)             |
| Italian, Italy                 | 1,922 (0.9)   | 37.4 (35.21, 39.62)                                  | 29.5 (27.48, 31.58)***                | 48.1 (45.84, 50.43)***                   | 36.5 (34.36, 38.75)***          |
| Greek, Australia               | 1,072 (0.5)   | 34.1 (31.36, 37.03)                                  | 21.2 (18.92, 23.75)***                | 44.0 (40.98, 47.03)                      | 30.1 (27.44, 32.96)             |
| Greek, Greece                  | 696 (0.3)     | 38.6 (35.02, 42.39)                                  | 30.5 (27.14, 34.09)**                 | 45.8 (42.01, 49.61)                      | 44.4 (40.63, 48.14)***          |
| Polish, Australia              | 1,111 (0.5)   | 39.0 (36.14, 41.91)*                                 | 28.7 (26.05, 31.41)                   | 41.8 (38.86, 44.72)                      | 37.8 (34.94, 40.70)***          |
| Polish, Poland                 | 471 (0.2)     | 47.5 (42.98, 52.12)***                               | 38.7 (34.31, 43.27)***                | 46.4 (41.80, 51.06)                      | 51.0 (46.37, 55.52)***          |
| Maltese, Australia             | 675 (0.3)     | 35.0 (31.53, 38.66)                                  | 28.8 (25.49, 32.29)                   | 41.1 (37.47, 44.93)                      | 29.2 (25.94, 32.79)             |
| Maltese, Malta                 | 715 (0.3)     | 38.7 (35.19, 42.43)                                  | 30.1 (26.78, 33.57)*                  | 38.9 (35.29, 42.59)                      | 38.9 (35.31, 42.57)***          |
| Lebanese, Australia            | 461 (0.2)     | 34.0 (29.83, 38.49)                                  | 23.5 (19.81, 27.54)                   | 37.5 (33.16, 42.06)*                     | 26.2 (22.35, 30.39)*            |
| Lebanese, Lebanon              | 567 (0.3)     | 30.9 (27.24, 34.78)*                                 | 29.6 (25.99, 33.43)                   | 41.4 (37.34, 45.56)                      | 45.7 (41.56, 49.89)***          |
| Croatian, Australia            | 218 (0.1)     | 37.3 (31.12, 43.93)                                  | 22.9 (17.83, 28.92)                   | 44.9 (38.34, 51.74)                      | 34.3 (28.32, 40.93)             |
| Croatian, Croatia              | 349 (0.2)     | 43.4 (38.20, 48.74)**                                | 40.8 (35.63, 46.14)***                | 47.3 (42.00, 52.68)                      | 48.0 (42.75, 53.36)***          |
| Indian, Australia              | 213 (0.1)     | 39.0 (32.60, 45.72)                                  | 20.8 (15.90, 26.69)                   | 43.6 (36.97, 50.42)                      | 32.3 (26.38, 38.90)             |
| Indian, India                  | 668 (0.3)     | 47.7 (43.91, 51.61)***                               | 26.3 (23.12, 29.66)                   | 26.5 (23.29, 29.88)***                   | 39.4 (35.66, 43.18)***          |
| Chinese, Australia             | 690 (0.3)     | 39.3 (35.68, 43.03)                                  | 28.7 (25.41, 32.24)                   | 40.5 (36.80, 44.23)                      | 32.8 (29.36, 36.41)             |
| Chinese, China                 | 2,250 (1.0)   | 53.5 (51.40, 55.62)***                               | 40.5 (38.42, 42.57)***                | 42.5 (40.42, 44.59)                      | 56.7 (54.62, 58.82)***          |

\*\*\* p < 0.001; \*\* p < 0.01; \* p < 0.05 (from Australian, Australia)

Table 2 reports results from multilevel logit regression. Model 1 reports ethnic and country of birth differences in psychological distress, adjusted for age and gender (sensu Figure 1). We adjusted this model for each social interaction variable individually, and then simultaneously (Model 2). Higher quartiles of each social interaction variable were associated with a lower risk of psychological distress; especially that denoting the number of people that can be relied on (highest quartile odds ratio: 0.36, 95% confidence interval: 0.34, 0.38). Social interactions only fully explained the higher risk of psychological distress experienced by the Chinese born in China (as denoted by statistical

significance). However, there were other instances where odds ratios were attenuated, though remained significant, and this was often for people born outside Australia, such as the Lebanese born in Lebanon (OR=3.97 to 3.67) and the Croatians born in Croatia (OR=2.70 to 2.30). Adjusting for all other individual-level characteristics, neighbourhood affluence and geographical remoteness (Model 3) had a more substantive effect on the ethnic differences (OR=3.67 to 2.11 for the Lebanese born in Lebanon; OR=2.30 to 1.84 for the Croatians born in Croatia).

**Table 2: Ethnic and country of birth group differences in the risk of psychological distress, adjusted for social interactions variables and other individual and neighbourhood characteristics**

| Ethnicity, country of birth                             | Model 1                              | Model 2              | Model 3              |
|---------------------------------------------------------|--------------------------------------|----------------------|----------------------|
|                                                         | Odds Ratio (95% Confidence Interval) |                      |                      |
| Australian, Australia                                   | 1                                    | 1                    | 1                    |
| Australian, Not Australia                               | 1.83 (1.59, 2.10)***                 | 1.73 (1.50, 1.99)*** | 1.57 (1.36, 1.82)*** |
| English, Australia                                      | 0.93 (0.90, 0.97)***                 | 0.94 (0.90, 0.98)*** | 0.96 (0.92, 1.00)*   |
| English, UK                                             | 0.83 (0.78, 0.88)***                 | 0.75 (0.71, 0.80)*** | 0.82 (0.77, 0.87)*** |
| Scottish, Australia                                     | 0.89 (0.84, 0.93)***                 | 0.90 (0.86, 0.95)*** | 0.96 (0.91, 1.01)    |
| Scottish, UK                                            | 0.81 (0.72, 0.90)***                 | 0.76 (0.68, 0.85)*** | 0.82 (0.73, 0.92)*** |
| Welsh, Australia                                        | 1.10 (0.93, 1.31)                    | 1.12 (0.94, 1.33)    | 1.19 (1.00, 1.42)    |
| Welsh, UK                                               | 0.82 (0.65, 1.04)                    | 0.75 (0.60, 0.95)*   | 0.84 (0.66, 1.07)    |
| Irish, Australia                                        | 0.95 (0.91, 0.99)*                   | 0.96 (0.92, 1.01)    | 0.99 (0.95, 1.04)    |
| Irish, Ireland                                          | 0.93 (0.76, 1.13)                    | 0.87 (0.71, 1.06)    | 0.92 (0.75, 1.12)    |
| Danish, Australia                                       | 0.90 (0.70, 1.15)                    | 0.91 (0.71, 1.17)    | 0.94 (0.73, 1.21)    |
| Danish, Denmark                                         | 0.43 (0.22, 0.84)*                   | 0.36 (0.18, 0.71)**  | 0.38 (0.19, 0.77)**  |
| French, Australia                                       | 1.04 (0.87, 1.24)                    | 1.01 (0.84, 1.21)    | 0.99 (0.83, 1.19)    |
| French, France                                          | 1.08 (0.73, 1.60)                    | 0.87 (0.58, 1.29)    | 1.00 (0.67, 1.51)    |
| Swiss, Australia                                        | 1.01 (0.62, 1.65)                    | 1.00 (0.61, 1.63)    | 1.14 (0.69, 1.88)    |
| Swiss, Switzerland                                      | 0.33 (0.17, 0.65)***                 | 0.27 (0.14, 0.53)*** | 0.33 (0.17, 0.65)*** |
| German, Australia                                       | 1.12 (1.05, 1.19)***                 | 1.11 (1.04, 1.19)*** | 1.10 (1.02, 1.17)**  |
| German, Germany                                         | 0.98 (0.86, 1.13)                    | 0.82 (0.71, 0.94)**  | 0.87 (0.75, 1.00)*   |
| Dutch, Australia                                        | 1.03 (0.88, 1.22)                    | 1.02 (0.87, 1.20)    | 1.07 (0.90, 1.27)    |
| Dutch, Netherlands                                      | 0.96 (0.85, 1.09)                    | 0.88 (0.78, 1.01)    | 0.91 (0.80, 1.04)    |
| Spanish, Australia                                      | 1.08 (0.77, 1.52)                    | 1.08 (0.76, 1.52)    | 0.92 (0.64, 1.33)    |
| Spanish, Spain                                          | 1.35 (0.87, 2.11)                    | 1.14 (0.73, 1.79)    | 1.06 (0.67, 1.67)    |
| Italian, Australia                                      | 1.05 (0.94, 1.18)                    | 1.04 (0.93, 1.17)    | 1.07 (0.96, 1.21)    |
| Italian, Italy                                          | 1.79 (1.59, 2.02)***                 | 1.68 (1.49, 1.89)*** | 1.46 (1.29, 1.65)**  |
| Greek, Australia                                        | 1.07 (0.88, 1.29)                    | 1.08 (0.89, 1.30)    | 1.11 (0.91, 1.35)    |
| Greek, Greece                                           | 2.04 (1.69, 2.46)***                 | 1.81 (1.50, 2.19)*** | 1.33 (1.10, 1.62)**  |
| Polish, Australia                                       | 1.17 (0.98, 1.40)                    | 1.10 (0.92, 1.32)    | 1.15 (0.95, 1.39)    |
| Polish, Poland                                          | 1.89 (1.51, 2.37)***                 | 1.54 (1.22, 1.94)*** | 1.64 (1.30, 2.08)*** |
| Maltese, Australia                                      | 1.26 (1.01, 1.57)*                   | 1.27 (1.01, 1.59)*   | 1.11 (0.88, 1.41)    |
| Maltese, Malta                                          | 1.71 (1.41, 2.09)***                 | 1.59 (1.30, 1.94)*** | 1.19 (0.97, 1.46)    |
| Lebanese, Australia                                     | 1.13 (0.85, 1.50)                    | 1.22 (0.92, 1.62)    | 1.31 (0.98, 1.75)    |
| Lebanese, Lebanon                                       | 3.97 (3.30, 4.76)***                 | 3.67 (3.04, 4.42)*** | 2.11 (1.73, 2.57)*** |
| Croatian, Australia                                     | 0.97 (0.63, 1.49)                    | 0.94 (0.61, 1.46)    | 1.00 (0.64, 1.56)    |
| Croatian, Croatia                                       | 2.70 (2.11, 3.46)***                 | 2.30 (1.78, 2.96)*** | 1.84 (1.42, 2.39)*** |
| Indian, Australia                                       | 1.86 (1.31, 2.63)***                 | 1.88 (1.33, 2.68)*** | 1.64 (1.14, 2.35)**  |
| Indian, India                                           | 1.13 (0.89, 1.43)                    | 1.07 (0.84, 1.36)    | 1.43 (1.12, 1.83)**  |
| Chinese, Australia                                      | 1.18 (0.94, 1.48)                    | 1.16 (0.92, 1.45)    | 1.18 (0.93, 1.50)    |
| Chinese, China                                          | 1.19 (1.05, 1.35)**                  | 0.90 (0.79, 1.02)    | 1.05 (0.92, 1.20)    |
| <b>Number of occasions spent with friends or family</b> |                                      |                      |                      |
| Quartile 1 (Low)                                        |                                      | 1                    | 1                    |
| Quartile 2 (Low to Moderate)                            |                                      | 0.77 (0.74, 0.81)*** | 0.78 (0.75, 0.82)*** |
| Quartile 3 (Moderate to High)                           |                                      | 0.80 (0.77, 0.83)*** | 0.78 (0.75, 0.81)*** |
| Quartile 4 (High)                                       |                                      | 1.00 (0.97, 1.04)    | 0.89 (0.85, 0.92)*** |
| <b>Number of telephone conversations</b>                |                                      |                      |                      |
| Quartile 1 (Low)                                        |                                      | 1                    | 1                    |
| Quartile 2 (Low to Moderate)                            |                                      | 0.77 (0.74, 0.80)*** | 0.82 (0.79, 0.85)*** |
| Quartile 3 (Moderate to High)                           |                                      | 0.79 (0.76, 0.82)*** | 0.83 (0.80, 0.87)*** |
| Quartile 4 (High)                                       |                                      | 0.78 (0.75, 0.81)*** | 0.85 (0.82, 0.88)*** |

| Number of visits to social clubs       |                      |                      |
|----------------------------------------|----------------------|----------------------|
| Quartile 1 (Low)                       | 1                    | 1                    |
| Quartile 2 (Low to Moderate)           | 0.75 (0.72, 0.78)*** | 0.86 (0.83, 0.90)*** |
| Quartile 3 (Moderate to High)          | 0.77 (0.74, 0.80)*** | 0.88 (0.84, 0.91)*** |
| Quartile 4 (High)                      | 0.95 (0.92, 0.98)**  | 1.01 (0.97, 1.04)    |
| Number of people that can be relied on |                      |                      |
| Quartile 1 (Low)                       | 1                    | 1                    |
| Quartile 2 (Low to Moderate)           | 0.58 (0.56, 0.61)*** | 0.66 (0.63, 0.68)*** |
| Quartile 3 (Moderate to High)          | 0.48 (0.47, 0.50)*** | 0.56 (0.54, 0.58)*** |
| Quartile 4 (High)                      | 0.36 (0.34, 0.38)*** | 0.44 (0.42, 0.46)*** |

\* p < 0.05; \*\* p < 0.01; \*\*\* p < 0.001

Model 1: Multilevel logit regression, adjusted for age and gender

Model 2: Model 1 + social interactions

Model 3: Model 2 + other individual-level variables, neighbourhood affluence and geographical remoteness

Figure 2 illustrates the ethnic and country of birth group differences in own-group ethnic density. Regardless of whether participants were born in Australia or the UK, those identifying as Australian (32.6%) or English (35.1%) ethnicities lived in the most ethnically dense neighbourhoods. Compared to the Australians and the English, the clustering of other ethnic groups in NSW was much lower. The highest mean ethnic density for non-Australian and non-English groups was for the Chinese born in China at 14.9%, whereas the lowest was for Australian born Swiss at 0.1%. There was evidence of heterogeneity of mean ethnic density within some groups. For example, Italians born in Australia had a mean of ethnic density of 4.9% but Italian-born Italians had 7.7%. Similar patterns were observed for Greeks, the Chinese and the Lebanese.

<Figure 2 here>

For the next stage of analysis we investigated the level of association with own-group ethnic density. This necessitated stratification of the sample by ethnic and country of birth group to match each individual with the relevant ethnic density measure. For example, Chinese ethnic density was matched to Chinese individuals (irrespective of whether they were born in China or Australia). We conducted these analyses for all groups, but due to space constraints, we focus our report on groups that have a mean ethnic density of 2% or more: Australians, English, Scottish, Irish, German, Italian, Greek, Lebanese, and Chinese. Table 3 reports mostly weak and positive or null (i.e.  $p > 0.05$ ) correlations between own group ethnic density and each of the social interactions variables. The most consistent set of correlations were for the social interactions variable which indicated how many people could be relied on within a one-hour travel-time.





|                           |                      |                      |                     |
|---------------------------|----------------------|----------------------|---------------------|
| Australian, Australia     | 1.01 (1.01, 1.01)*** | 1.01 (1.01, 1.01)*** | 1.00 (1.00, 1.00)   |
| Australian, not Australia | 0.97 (0.96, 0.99)*** | 0.98 (0.96, 0.99)**  | 0.97 (0.95, 0.99)** |
| English, Australia        | 1.00 (1.00, 1.00)    | 1.00 (1.00, 1.00)    | 1.00 (0.99, 1.00)   |
| English, UK               | 0.99 (0.99, 1.00)*   | 0.99 (0.99, 1.00)*   | 0.99 (0.99, 1.00)*  |
| Scottish, Australia       | 0.97 (0.94, 1.00)*   | 0.98 (0.95, 1.01)    | 0.99 (0.96, 1.01)   |
| Scottish, UK              | 0.98 (0.91, 1.06)    | 0.99 (0.92, 1.07)    | 1.00 (0.93, 1.08)   |
| Irish, Australia          | 0.98 (0.96, 0.99)**  | 0.98 (0.97, 1.00)**  | 1.00 (0.98, 1.01)   |
| Irish, Ireland            | 0.94 (0.86, 1.03)    | 0.95 (0.86, 1.04)    | 0.97 (0.87, 1.07)   |
| German, Australia         | 0.99 (0.95, 1.03)    | 0.99 (0.95, 1.04)    | 1.00 (0.96, 1.04)   |
| German, Germany           | 1.00 (0.90, 1.11)    | 1.00 (0.90, 1.12)    | 1.00 (0.89, 1.12)   |
| Italian, Australia        | 0.99 (0.97, 1.01)    | 0.99 (0.98, 1.01)    | 1.01 (0.99, 1.03)   |
| Italian, Italy            | 1.00 (0.98, 1.01)    | 1.00 (0.99, 1.02)    | 1.00 (0.99, 1.02)   |
| Greek, Australia          | 0.98 (0.94, 1.02)    | 0.99 (0.95, 1.04)    | 1.01 (0.96, 1.05)   |
| Greek, Greece             | 1.01 (0.99, 1.03)    | 1.01 (0.99, 1.03)    | 1.01 (0.98, 1.03)   |
| Lebanese, Australia       | 1.01 (0.95, 1.07)    | 1.04 (0.98, 1.10)    | 0.98 (0.91, 1.06)   |
| Lebanese, Lebanon         | 1.02 (1.00, 1.05)    | 1.02 (1.00, 1.05)    | 1.01 (0.98, 1.04)   |
| Chinese, Australia        | 0.90 (0.81, 0.99)*   | 0.86 (0.76, 0.97)*   | 0.88 (0.70, 1.12)   |
| Chinese, China            | 1.00 (0.99, 1.01)    | 1.00 (0.99, 1.01)    | 1.00 (0.99, 1.01)   |

\*\*\*  $p < 0.05$ ; \*\*  $p < 0.01$ ; \*  $p < 0.05$

Model 1: Adjusted for age and gender

Model 2: Model 1 + social interactions

Model 3: Model 2 + individual characteristics, neighbourhood affluence and geographical remoteness

## DISCUSSION

This paper examined the relationship between ethnic density and psychological distress in one of the most ethnic diverse areas of Australia. We found substantive heterogeneity in the risk of psychological distress between and within ethnic groups. Ethnic differences in social interactions, individual and neighbourhood characteristics did not explain the ethnic differences in the risk of psychological distress. More social interactions were associated with a lower risk of psychological distress, especially the number of people study participants felt they could rely on. Increasing own-group ethnic density was associated more social interactions and less psychological distress for some ethnic groups, but not all. However, it was the characteristics of individuals and the neighbourhoods in which they lived, not the social interactions, which mostly explained the ethnic density effects on psychological distress. Only the English born in the UK and the overseas-born Australians appeared to benefit from ethnic density after controlling for all other characteristics.

Although there are many studies on ethnic density and mental health<sup>4 6 10-18</sup>, only two others have tested whether this relationship is explained by social interactions. A UK study<sup>10</sup> found a lower risk of common mental disorders for the Irish and for the Bangladeshi groups they studied in more ethnically dense neighbourhoods. This was not fully explained by measures of practical and emotional social support. Contrary to the ethnic density hypothesis, this study also reported significantly higher risk of common mental disorders among white British in ethnically dense neighbourhoods. A study in the US<sup>11</sup> also showed the benefits of living in a higher own-ethnic group

1  
2  
3 density neighbourhoods for the emotional well-being of Black and Hispanic groups. Measures of  
4 personal and neighbourhood social support partially explained the relationship for Blacks but not  
5 among Hispanics. Therefore, despite using contrasting measures of mental health and social  
6 interactions for different ethnic groups in the UK, US and Australia, our findings are consistent  
7 wherein social interactions only played a weak role in explaining the ethnic density effect on mental  
8 health.  
9

10  
11 A particular strength of our study includes the large sample sizes for many different ethnic groups;  
12 more than has been possible to analyse in previous studies<sup>4</sup>. This allowed stratification by country  
13 of birth, which afforded new insights into the heterogeneity of mental health, social interactions and  
14 ethnic density within groups. It is noteworthy that levels of ethnic density varied considerably by  
15 country of birth within some ethnic groups (e.g. the Chinese), though not all (e.g. the English). Given  
16 the general supposition that higher levels of ethnic density are better for mental health, it could be  
17 argued that for many groups, levels of ethnic density do not achieve a sufficient concentration  
18 necessary for health promotion in this sample. This hypothesis is not convincing, however, when  
19 one considers that no association between ethnic density and psychological distress was found for  
20 the Chinese born in China, who reported a mean ethnic density of approximately 15% and a  
21 maximum of nearly 80%, but there was an association among the Chinese born in Australia, for  
22 whom the mean ethnic density was about 5% and a maximum of around 63%. Likewise, there  
23 appeared to be a benefit of ethnic density for the UK-born English, but not the English born in  
24 Australia, despite having very similar levels of own-group ethnic density. As such, it would appear  
25 that a more nuanced approach may be required in future, using other sources of administrative data  
26 and qualitative methods to examine what it is about ethnically dense neighbourhoods which  
27 promote better mental health in some ethnic groups, but not all.  
28  
29  
30  
31  
32

33 Our measures of psychological distress and social interactions have been widely validated. The small  
34 geographical scale (CCD) used to construct ethnic density provided a more accurate description of  
35 local circumstances than previous work which has relied upon larger spatial scales, helping to  
36 identify small 'pockets' of ethnic density and affluence that would otherwise have been hidden<sup>45</sup>.  
37 The focus on small scale geography is an advantage, though our study shares a common limitation  
38 among others of this genre in the reliance upon administrative boundaries, which are unlikely to  
39 perfectly correlate with residents' perceptions of neighbourhood<sup>46</sup>.  
40  
41  
42

43 It is reasonable to expect that social support from the neighbourhood would be reflected in the four  
44 measures of social interactions used in the study, albeit imperfectly. Social clubs attended, for  
45 example, may be located in the neighbourhood and many of the people who can be relied on within  
46 one hour of travel may in fact live much closer. The limitation, however, is that the questions used  
47 in the 45 and Up Study did not ask participants to distinguish how much of these interactions  
48 occurred within versus outside the neighbourhood in which they lived. It would be useful for further  
49 work, therefore, to examine indicators which specify neighbourhood parameters within the question.  
50 Another limitation was that the 45 and Up Study was sampled from the Medicare Australia database  
51 which mainly includes Australian citizens and migrants on permanent residency visas. Only some  
52 migrants on temporary visas are included on this scheme and this is likely to mean that some ethnic  
53 minorities were not represented in our study. Representativeness is also a concern for a dataset  
54 wherein the response rate was only 18%, although comparisons between the 45 and Up Study and a  
55 'representative' dataset have helped to alleviate these concerns to some extent<sup>26</sup>. The 45 and Up  
56  
57  
58  
59  
60

1  
2  
3 Study asked participants about Aboriginal and Torres Strait Islander origin, though responses to this  
4 variable were not available for this investigation and are the focus of a follow-up study. Many  
5 studies have suggested that spatial variation in the experiences of racism could help to explain the  
6 ethnic density effect<sup>14 16</sup>. Although we had no measure of racism in our study, virtually all benefits  
7 of ethnic density were already explained by other individual characteristics. Finally, our study  
8 represents only people 45 years and older, so it cannot discount the possibility of different patterns  
9 for younger age groups.  
10  
11

## 12 13 14 CONCLUSION

15  
16 Ethnic groups in New South Wales, Australia, experience substantively different risks of  
17 psychological distress. These differences also align by country of birth, though there is no consistent  
18 pattern. Increasing social interactions, particularly those which help people to develop relationships  
19 with others they can depend on in times of need, are beneficial for mental health regardless of  
20 ethnicity and country of birth. In comparison, the ethnic density of where people live was protective  
21 only for the UK-born English and the overseas-born Australians.  
22  
23

## 24 25 26 27 ACKNOWLEDGEMENTS, COMPETING INTERESTS & FUNDING

28  
29 We thank all of the men and women who participated in the 45 and Up Study. The 45 and Up Study  
30 is managed by the Sax Institute in collaboration with major partner Cancer Council New South Wales;  
31 and partners the Heart Foundation (NSW Division); NSW Ministry of Health; *beyondblue: the*  
32 *national depression initiative*; Ageing, Disability and Home Care, NSW Family and Community  
33 Services; and the Australian Red Cross Blood Service. We acknowledge the use of 2006 census and  
34 boundary data provided by the Australian Bureau of Statistics. To preserve the anonymity of  
35 participants in The 45 and Up Study, some parameters of the Census Collector District (CCD) level  
36 data cannot be reported. This location-indexing data from the 45 and up Study is highly restricted  
37 access and will be made available only through SURE (<https://www.sure.org.au/>).  
38  
39

40  
41 The authors have no competing interests.

42  
43 No funding was sought for this study.  
44  
45

## 46 47 LIST OF FIGURES

48  
49 **Figure 1: Ethnic and country of birth differences in the rate of psychological distress (Kessler scores of 22 and over),**  
50 **adjusted for age and gender**

51  
52 **Figure 2: Ethnic and country of birth differences in mean own-group ethnic density (percentage) at the Census Collection**  
53 **District (CCD) scale, with minimum and maximum: sorted highest to lowest**  
54  
55  
56  
57  
58  
59  
60

## REFERENCES

1. Vega W, Rumbaut R. Ethnic minorities and mental health. *Annual Review of Sociology* 1991;17:351-83.
2. Nazroo JY. Ethnicity and Mental Health: Findings from a National Community Survey. London: Policy Studies Institute, 1997.
3. Sproston K, Nazroo J. *Ethnic Minority Psychiatric Illness Rates in the Community (EMPIRIC)*. London: TSO, 2002.
4. Shaw RJ, Atkin K, Bécares L, Albor CB, Stafford M, Kiernan KE, et al. Impact of ethnic density on adult mental disorders: narrative review. *The British Journal of Psychiatry* 2012;201(1):11-19.
5. Paradies Y. A systematic review of empirical research on self-reported racism and health. *International Journal of Epidemiology* 2006;35:888-901.
6. Pickett K, Wilkinson R. People like us: ethnic group density effects on health. *Ethnicity and Health* 2008;13(4):321-34.
7. Letki N. Does diversity erode social cohesion? Social capital and race in British neighbourhoods. *Political Studies* 2008;56(1):99-126.
8. Twigg L, Taylor J, Mohan J. Diversity or disadvantage? Putnam, Goodhart, ethnic heterogeneity, and collective efficacy. *Environment and Planning A* 2010;42(6):1421-38.
9. Bécares L, Stafford M, Laurence J, Nazroo J. Composition, Concentration and Deprivation Exploring their Association with Social Cohesion among Different Ethnic Groups in the UK. *Urban Studies* 2011;48(13):2771-87.
10. Das-Munshi J, Becares L, Dewey ME, Stansfeld SA, Prince MJ. Understanding the effect of ethnic density on mental health: multi-level investigation of survey data from England. *BMJ: British Medical Journal* 2010;341.
11. Yuan ASV. Racial composition of neighborhood and emotional well-being. *Sociological Spectrum* 2007;28(1):105-29.
12. Pickett KE, Shaw RJ, Atkin K, Kiernan KE, Wilkinson RG. Ethnic density effects on maternal and infant health in the Millennium Cohort Study. *Social Science & Medicine* 2009;69(10):1476-83.
13. Becares L, Nazroo J, Jackson J, Heuvelman H. Ethnic density effects on health and experienced racism among Caribbean people in the US and England: A cross-national comparison. *Social Science & Medicine* 2012.
14. Becares L, Nazroo J, Stafford M. The buffering effects of ethnic density on experienced racism and health. *Health & Place* 2009;15(3):670-8.
15. Stafford M, Becares L, Nazroo J. Objective and Perceived Ethnic Density and Health: Findings From a United Kingdom General Population Survey. *American Journal of Epidemiology* 2009;170(4):484-93.
16. Astell-Burt T, Maynard MJ, Lenguerrand E, Harding S. Racism, ethnic density and psychological well-being through adolescence: evidence from the Determinants of Adolescent Social well-being and Health longitudinal study. *Ethnicity and Health* 2012;17:71-87.
17. Gieling M, Vollebergh W, van Dorsselaer S. Ethnic density in school classes and adolescent mental health. *Soc Psychiatry Psychiatr Epidemiol* 2009.
18. Xue Y, Leventhal T, Brooks-Gunn J, Earls F. Neighborhood residence and mental health problems of 5-to 11-year-olds. *Archives of General Psychiatry* 2005;62(5):554.
19. Australian Bureau of Statistics. *A Picture of the Nation: The Statistician's Report on the 2006 Census*. Canberra: Australian Government, 2006.
20. Anikeeva O, Bi P, Hiller JE, Ryan P, Roder D, Han GS. The Health Status of Migrants in Australia: A Review. *Asia-Pacific Journal of Public Health* 2010;22(2):159-93.
21. Thorburn A. Prevalence of obesity in Australia. *Obesity reviews* 2005;6(3):187-89.
22. Johnston R, Forrest J, Poulsen M. Sydney's ethnic geography: new approaches to analysing patterns of residential concentration. *Australian Geographer* 2001;32(2):149-62.

- 1
- 2
- 3 23. Poulsen M, Johnston R, Forrest J. Is Sydney a divided city ethnically? *Australian geographical studies* 2004;42(3):356-77.
- 4
- 5 24. Dunn KM. Rethinking ethnic concentration: the case of Cabramatta, Sydney. *Urban Studies*
- 6 1998;35(3):503-27.
- 7
- 8 25. Banks E, Redman S, Jorm L, Armstrong B, Bauman A, Beard J, et al. Cohort profile: the 45 and up
- 9 study. *International Journal of Epidemiology* 2008;37(5):941.
- 10
- 11 26. Mealing NM, Banks E, Jorm LR, Steel DG, Clements MS, Rogers KD. Investigation of relative risk
- 12 estimates from studies of the same population with contrasting response rates and designs.
- 13 *BMC medical research methodology* 2010;10(1):26.
- 14
- 15 27. Kessler RC, Andrews G, Colpe LJ, Hiripi E, Mroczek DK, Normand SL, et al. Short screening scales
- 16 to monitor population prevalences and trends in non-specific psychological distress.
- 17 *Psychological Medicine* 2002;32:959-76.
- 18
- 19 28. Furukawa TA, Kessler RC, Slade T, Andrews G. The performance of the K6 and K10 screening
- 20 scales for psychological distress in the Australian National Survey of Mental Health and Well-
- 21 Being. *Psychological Medicine* 2003;33(2):357-62.
- 22
- 23 29. Breslau J, Aguilar-Gaxiola S, Kendler KS, Su M, Williams D, Kessler RC. Specifying race-ethnic
- 24 differences in risk for psychiatric disorder in a USA national sample. *Psychological Medicine*
- 25 2006;36(1):57-68.
- 26
- 27 30. Carrà G, Sciarini P, Segagni-Lusignani G, Clerici M, Montomoli C, Kessler R. Do they actually work
- 28 across borders? Evaluation of two measures of psychological distress as screening
- 29 instruments in a non Anglo-Saxon country. *European Psychiatry* 2011;26(2):122-27.
- 30
- 31 31. Furukawa TA, Kawakami N, Saitoh M, Ono Y, Nakane Y, Nakamura Y, et al. The performance of
- 32 the Japanese version of the K6 and K10 in the World Mental Health Survey Japan.
- 33 *International journal of methods in psychiatric research* 2008;17(3):152-58.
- 34
- 35 32. Australian Bureau of Statistics. *Information paper: use of the Kessler Psychological Distress Scale*
- 36 *in ABS Health Surveys, Australia*. Canberra: Australian Bureau of Statistics, 2003.
- 37
- 38 33. Banks E, Byles JE, Gibson RE, Rodgers B, Latz IK, Robinson IA, et al. Is psychological distress in
- 39 people living with cancer related to the fact of diagnosis, current treatment or level of
- 40 disability? Findings from a large Australian study. *Medical Journal of Australia*
- 41 2010;193(5):92.
- 42
- 43 34. Byles JE, Gallienne L, Blyth FM, Banks E. Relationship of age and gender to the prevalence and
- 44 correlates of psychological distress in later life. *International Psychogeriatrics* 2012;1(1):1-10.
- 45
- 46 35. George ES, Jorm L, Kolt GS, Bambrick HJ, Lujic S. Physical Activity and Psychological Distress in
- 47 Older Men: Findings From the New South Wales 45 and Up Study. *Journal of Aging and*
- 48 *Physical Activity* 2012;20:300-16.
- 49
- 50 36. Koenig HG, Westlund RE, George LK, Hughes DC, Blazer DG, Hybels C. Abbreviating the Duke
- 51 Social Support Index for use in chronically ill elderly individuals. *Psychosomatics* 1993;34:61-
- 52 69.
- 53
- 54 37. Howe C, Matthews LR, Heard R. Work to retirement: a snapshot of psychological health in a
- 55 multicultural Australian population. *Work* 2010;36:119-27.
- 56
- 57 38. Pachana NA, Smith N, Watson M, McLaughlin D, Dobson A. Responsiveness of the Duke Social
- 58 Support sub-scales in older women. *Age & Ageing* 2008;37:666-72.
- 59
- 60 39. Chiew M, Weber M, Egger S, Sitas F. A cross-sectional exploration of smoking status and social
- interaction in a large population-based Australian cohort. *Social Science & Medicine*
- 2012;75(1):77-86.
40. Australian Bureau of Statistics. 2006 Census Geographies: Census Collector District. Canberra,
- 2012.
41. Australian Bureau of Statistics. *Research Paper. Socio-Economic Indexes for Areas: Introduction,*
- Use and Future Directions*. Canberra: ABS, 2006.
42. Trewin D. Socio-Economic Indexes for Areas (SEIFA). *Canberra, Australia: Australian Bureau of*
- Statistics* 2001.

- 1
- 2
- 3 43. Australian Population and Migration Research Centre. ARIA (Accessibility/Remoteness Index of
- 4 Australia): The University of Adelaide, 2012.
- 5 44. Leyland AH, Goldstein H. *Multilevel modelling of health statistics*: Wiley, 2001.
- 6 45. Exeter D, Flowerdew R, Boyle P. Policy implications of pockets of deprivation in Scotland. *GIS and*
- 7 *Evidence-Based Policy Making* 2007:95.
- 8 46. Flowerdew R, Manley DJ, Sabel CE. Neighbourhood effects on health: Does it matter where you
- 9 draw the boundaries? *Social Science & Medicine* 2008.
- 10
- 11
- 12
- 13
- 14
- 15
- 16
- 17
- 18
- 19
- 20
- 21
- 22
- 23
- 24
- 25
- 26
- 27
- 28
- 29
- 30
- 31
- 32
- 33
- 34
- 35
- 36
- 37
- 38
- 39
- 40
- 41
- 42
- 43
- 44
- 45
- 46
- 47
- 48
- 49
- 50
- 51
- 52
- 53
- 54
- 55
- 56
- 57
- 58
- 59
- 60



**Do social interactions explain ethnic differences in psychological distress and the protective effect of local ethnic density? Evidence from a cross-sectional study of 226,487 adults in middle-to-older age**

|                                 |                                                                                                                                                                                                                                                            |
|---------------------------------|------------------------------------------------------------------------------------------------------------------------------------------------------------------------------------------------------------------------------------------------------------|
| Journal:                        | <i>BMJ Open</i>                                                                                                                                                                                                                                            |
| Manuscript ID:                  | bmjopen-2013-002713.R2                                                                                                                                                                                                                                     |
| Article Type:                   | Research                                                                                                                                                                                                                                                   |
| Date Submitted by the Author:   | 07-Apr-2013                                                                                                                                                                                                                                                |
| Complete List of Authors:       | Feng, Xiaoqi; University of Western Sydney, Centre for Health Research, School of Medicine<br>Astell-Burt, Thomas; University of Western Sydney, School of Science and Health<br>Kolt, Gregory; University of Western Sydney, School of Science and Health |
| <b>Primary Subject Heading</b>: | Epidemiology                                                                                                                                                                                                                                               |
| Secondary Subject Heading:      | Mental health, Public health, Sociology                                                                                                                                                                                                                    |
| Keywords:                       | MENTAL HEALTH, EPIDEMIOLOGY, PUBLIC HEALTH, SOCIAL MEDICINE                                                                                                                                                                                                |
|                                 |                                                                                                                                                                                                                                                            |

SCHOLARONE™  
Manuscripts

1  
2  
3 **Do social interactions explain ethnic differences in psychological distress and the protective effect**  
4 **of local ethnic density? Evidence from a cross-sectional study of 226,487 adults in middle-to-older**  
5 **age**  
6  
7

8  
9  
10 **Xiaoqi Feng, PhD\*<sup>1</sup>**

11 **Thomas Astell-Burt, PhD<sup>2,3</sup>**

12  
13 **Gregory S. Kolt, PhD<sup>2</sup>**  
14

15  
16  
17 \*Corresponding Author, Centre of Health Research, School of Medicine, University of Western  
18 Sydney, Locked Bag 1797, Penrith, NSW 2751, Australia. +61 2 4620 3951. X.Feng@uws.edu.au  
19

20 1 Centre of Health Research, School of Medicine, University of Western Sydney, Australia

21 2 School of Science and Health, University of Western Sydney, Australia

22 3 School of Geography and Geosciences, University of St Andrews, UK  
23

24  
25 **KEYWORDS**  
26

27 MENTAL HEALTH; ETHNICITY; MULTILEVEL MODELLING; PUBLIC HEALTH; SOCIAL EPIDEMIOLOGY  
28  
29

30  
31 **WORD COUNT: 3603**  
32  
33

34  
35  
36 "The Corresponding Author has the right to grant on behalf of all authors and does grant on behalf of all authors,  
37 an exclusive licence (or non-exclusive for government employees) on a worldwide basis to the BMJ Group and  
38 co-owners or contracting owning societies (where published by the BMJ Group on their behalf), and its Licensees  
39 to permit this article (if accepted) to be published in Journal of Epidemiology and Community Health and any  
40 other BMJ Group products and to exploit all subsidiary rights, as set out in our licence."  
41  
42  
43  
44  
45  
46  
47  
48  
49  
50  
51  
52  
53  
54  
55  
56  
57  
58  
59  
60



1  
2  
3 **Do social interactions explain ethnic differences in psychological distress and the protective effect**  
4 **of local ethnic density? Evidence from a cross-sectional study of 226,487 adults in middle-to-older**  
5 **age**  
6  
7  
8

9  
10 **ABSTRACT**

11 **Background:** A frequently proposed, but under-researched hypothesis is that ethnic density benefits  
12 mental health through increasing social interactions. We examined this hypothesis in 226,487 adults  
13 from 19 ethnic groups aged 45 years and older in Australia.  
14

15 **Methods:** Multilevel logit regression was used to measure association between ethnicity, social  
16 interactions, own-group ethnic density and scores of 22+ on the Kessler scale of psychological  
17 distress. Self-reported ancestry was used as a proxy for ethnicity. Measures of social interactions  
18 included the number of times in the last week were: *i)* spent with friends or family participants did  
19 not live with; *ii)* talked to someone on the telephone; *iii)* attended meetings of social groups; and *iv)*  
20 how many people could be relied upon outside their home, but within one hour of travel. Per cent  
21 own-group ethnic density was measured at the Census Collection District scale.  
22  
23  
24

25 **Results:** Psychological distress was reported by 11% of Australians born in Australia. The risk of  
26 experiencing psychological distress varied among ethnic minorities and by country of birth (e.g. 33%  
27 for the Lebanese born in Lebanon, compared to 4% for the Swiss born in Switzerland). These  
28 differences remained after full adjustment. Social interactions varied between ethnic groups and  
29 were associated with lower psychological distress and ethnic density. Ethnic density was associated  
30 with reduced psychological distress for some groups. This association, however, was explained by  
31 individual and neighbourhood characteristics and not by social interactions.  
32  
33  
34

35 **Conclusion:** Social interactions are important correlates of mental health, but do not fully explain  
36 ethnic differences in psychological distress, nor the protective effect of own-group density.  
37  
38  
39

40  
41 **WHAT IS ALREADY KNOWN ON THIS SUBJECT?**

42 Ethnic differences in mental health, and the reportedly protective influence of own group ethnic  
43 density, are largely unexplained in previous studies. Social interactions are widely hypothesised as a  
44 mechanism linking ethnic density with more favourable mental health, and may also explain ethnic  
45 differences more generally. However, few studies have empirically tested these hypotheses.  
46  
47  
48

49 **WHAT THIS STUDY ADDS?**

50 In a large cohort of Australian adults in middle-to-older age, ethnic differences in mental health were  
51 not explained by four measures of social interactions. Protective associations between ethnic  
52 density and mental health were largely explained by individual-level socioeconomic characteristics,  
53 not social interactions.  
54  
55  
56  
57  
58  
59  
60

1  
2  
3 **Do social interactions explain ethnic differences in psychological distress and the protective effect**  
4 **of local ethnic density? Evidence from a cross-sectional study of 226,487 adults in middle-to-older**  
5 **age**  
6  
7  
8

9  
10 **SUMMARY**

11 **Article Focus:**

- 12  
13  
14
  - Ethnic differences in mental health, and the reportedly protective influence of own group ethnic density, are largely unexplained in previous studies.
  - Social interactions are widely hypothesised as a mechanism linking ethnic density with more favourable mental health, and may also explain ethnic differences more generally. However, few studies have empirically tested these hypotheses.
  - We examined this hypothesis in 226,713 adults from 19 ethnic groups aged 45 years and older in Australia.

15  
16  
17  
18  
19  
20  
21  
22  
23

24  
25 **Key Messages:**

- 26  
27
  - Ethnic differences in mental health persisted after full adjustment; they were not explained by four measures of social interactions, or other individual and neighbourhood characteristics.
  - Protective associations between ethnic density and mental health were largely explained by individual-level socioeconomic characteristics, not social interactions.

28  
29  
30  
31  
32  
33  
34  
35

36 **Strengths and Limitations:**

- 37  
38
  - Large samples allowed for stratification of ethnic groups to investigate differences in mental health, social interactions and ethnic density by country of birth
  - The use of a very small geographical scale than in previous work allowed for the ascertainment of local 'pockets' of ethnic density, which would otherwise have been hidden if the study had been dependent upon larger spatial units
  - Some of the remaining ethnic inequalities in mental health could be explained by systematic differences in the experience of racial discrimination which we were unable to control for

39  
40  
41  
42  
43  
44  
45  
46  
47  
48  
49  
50  
51  
52  
53  
54  
55  
56  
57  
58  
59  
60

## INTRODUCTION

The existence of ethnic differences in mental health have long been reported, though not fully explained<sup>1-3</sup>. It has been suggested that living in areas of higher own group ethnic density reduces the risk of psychological distress, with increased social support hypothesised to be one of the primary drivers<sup>4</sup>. Social norms and support networks that promote resilience to material disadvantage and sources of psychosocial stress (e.g. racism<sup>5</sup>) are thought to be encouraged and maintained by this geographical clustering of ethnic groups<sup>6</sup>; even in deprived communities<sup>7-9</sup>. However, there is very little empirical evidence on the extent that increased social support explains why some groups tend to report better mental health in ethnically dense neighbourhoods.

Only two studies have been identified that have examined this proposition, one in the UK and another in the US, with equivocal results<sup>10,11</sup>. More broadly, studies of ethnic density and mental health have been mostly based upon adolescents and adults of child-bearing age in European and North American datasets<sup>10-18</sup>. Few studies have been conducted on adults in middle to older age. **This is especially the case in Australia (with the exception of an earlier ecological study<sup>19</sup>)**, which is surprising when one considers that, of the 22.6 million population, over one quarter were born outside Australia<sup>20</sup> and 50% of whom originated from non-English-speaking countries<sup>21</sup>.

Australian cities are some of the most ethnically diverse in the world<sup>22</sup> and often contain substantial residential clustering of ethnic groups<sup>23-25</sup>. Contrasting migration histories and residential patterns of ethnic groups means that one cannot assume association between ethnic density and mental health reported in Europe and North America generalises to the Australian context. Therefore, more research is required not only to further understand the mechanisms underlying ethnic density effects, but also to identify the extent that ethnic density may be beneficial to mental health in other ethnically diverse countries like Australia. In this paper we attempt to achieve both of these aims, in addition to an examination of ethnic differences in mental health and the role of social support more generally, through an analysis of a large number of ethnic groups and four measures of social interactions in an Australian cohort of adults.

## METHOD

### Study population

The 45 and Up study<sup>26</sup> is a large scale cohort of 267,151 residents aged 45 and over in New South Wales ('NSW', the most populous state in Australia). A baseline questionnaire covering a range of health and social issues was distributed to a random sample of adults listed in the Medicare Australia database between 2006 and 2009 inclusive. Medicare Australia is the database through which national healthcare is provided for Australian citizens and permanent residents, as well some temporary residents and refugees<sup>26</sup>. Response to the questionnaire was 18%, which is low, though previous research has suggested that results from the 45 and Up Study are broadly comparable to those derived from 'representative' samples<sup>27</sup>. The University of New South Wales Human Research Ethics Committee approved The 45 and Up Study. Further details including the baseline questionnaire are available to download from [www.45andUp.org.au](http://www.45andUp.org.au).

1  
2  
3 Ethnicity status was derived from the first (of up to two) responses to a question on self-reported  
4 ancestry ('*What is your ancestry?*'). Secondary responses to this question were not used in the  
5 definition of ethnicity as they were not available in our dataset. We focused on the 19 largest  
6 groups: Australian, English, Scottish, Welsh, Irish, Danish, French, Swiss, German, Dutch, Spanish,  
7 Italian, Greek, Polish, Maltese, Lebanese, Croatian, Indian, and Chinese. Large sample sizes allowed  
8 for stratification of each group by country of birth (assessed by the question '*in which country were*  
9 *you born?*') to address healthy-migrant effects. We retained all participants born in Australia  
10 (n=179,712), all participants of Australian ethnicity born outside Australia (n=1,336), and participants  
11 of non-Australian ethnic groups born in their ethnic-country of origin (n=33,739). Participants of  
12 non-Australian ethnic groups born elsewhere (i.e. not Australia or their ethnic-country of origin)  
13 were omitted from the sample (n=33,574) for substantive and practical reasons. Non-Australian  
14 ethnic groups born overseas and not in the ethnic-country of origin were heterogeneous by  
15 definition, which made it difficult to meaningfully interpret any results for to these participants.  
16 Furthermore, in practical terms, the sample sizes of many of these groups were small, which also  
17 reduced the potential to draw reliable statistical inference. We also omitted all participants missing  
18 a postcode identifier (n=263) and those missing a valid outcome measure (n=7,011). Missing data  
19 for independent variables was resolved via imputing the mean of the observed values, retaining an  
20 overall sample size of n=226,487.  
21  
22  
23  
24  
25  
26  
27

### 28 **Psychological distress**

29  
30 We used the Kessler Psychological Distress Scale (K10) to evaluate mental health status<sup>28 29</sup>. The K10  
31 measures symptoms of psychological distress experienced over the past four weeks, including  
32 feeling tired for no reason, nervous, hopeless, restless, depressed, sad and worthless. Participants  
33 had five choices for each of the ten questions (none of the time =1, a little of the time =2, some of  
34 the time =3, most of the time =4, all of the time=5) and these were summed to give the overall score.  
35 The K10 have been previously used to gauge levels of psychological distress across different  
36 countries and ethnic groups<sup>29-32</sup>. We constructed a binary variable wherein a score of 22 or more  
37 identified participants with a high risk of psychological distress<sup>33</sup>. The K10 has been used in this  
38 binary manner, with 22 as the cut-point, in previous published analyses of The 45 and Up Study<sup>34-36</sup>.  
39  
40  
41  
42  
43  
44

### 45 **Other individual-level measures**

46 Social interactions were measured using four questions from the shortened version of the Duke  
47 Social Support Index<sup>37</sup>. Three of the questions tested the number of times in the past week a  
48 participant: i) spent time with friends or family they did not live with; ii) talked to someone (friends,  
49 relatives or others) on the telephone; iii) attended meetings at social clubs or religious groups. The  
50 final question asked participants how many people outside their home, but within one hour travel-  
51 time, did they feel close to or could rely on. Previous work has constructed a composite indicator of  
52 social support from responses to these questions<sup>38 39</sup>, though we analysed each one separately in  
53 line with recent studies which have demonstrated that some are more important than others<sup>40</sup>.  
54  
55  
56  
57  
58  
59  
60

1  
2  
3 We also accounted for other individual-level variables (self-reported) which are known to correlate  
4 with mental health. These included: age, gender, physical activity, smoking status, Body Mass Index  
5 (BMI), highest educational qualifications, economic status, annual household income, couple status,  
6 and whether language(s) other than English were spoken at home.  
7  
8  
9

### 10 11 **Neighbourhood-level measures**

12 This study used Census Collection Districts (CCD) to define neighbourhoods. With a mean of 225  
13 residents<sup>41</sup>, CCDs were the smallest geographical scale for which 2006 Census data was made  
14 available<sup>42</sup>. However, 9% of participants in The 45 and Up Study were missing a valid CCD. In line  
15 with a previous study using the same data<sup>43</sup>, we assigned those missing a CCD with a pseudo-CCD  
16 according to the location of the population-weighted postcode centroid as nearly 100% had a  
17 postcode identifier. Therefore, 100% of the sample could be assigned neighbourhood measures and  
18 clustering within regression models could be operationalized at the CCD level.  
19  
20  
21

22 We constructed the measure of own-group ethnic density from 2006 Census data. The Census  
23 question on ancestry (a surrogate for ethnicity in our study) was very similar to that used in the 45  
24 and Up Study (“What is the person’s ancestry?”). The number of people within a CCD pertaining to  
25 each participant’s ethnic group was divided the total usual resident population. For example,  
26 Chinese participants (regardless of their country of birth) were assigned the percentage of the  
27 population in their CCD who self-identified as Chinese.  
28  
29

30 Other neighbourhood measures included local affluence and geographical remoteness. We used the  
31 Socio-Economic Index for Areas (SEIFA) ‘Index of Relative Socio-Economic Advantage/Disadvantage’  
32<sup>44</sup> to measure local affluence. This is a variable derived by the Australian Bureau of Statistics (ABS)  
33 using Census variables which relate to advantage and disadvantage, including household income and  
34 educational qualifications. This indicator was expressed in percentiles; higher percentiles indicate  
35 more affluent areas. Geographical remoteness was measured using the ‘Accessibility/Remoteness  
36 Index of Australia’ (ARIA)<sup>45</sup>. ARIA is a score ranging from 0 to 15, with scores of 2.4 and over used to  
37 distinguish between urban and inner regions (<2.4) and rural or remote (>=2.4).  
38  
39  
40  
41  
42

### 43 **Statistical analysis**

44 The study population was first assessed using descriptive statistics. Measures of ethnic density were  
45 mapped across NSW. To investigate ethnic differences in psychological distress, multilevel logistic  
46 regression was used to account for the clustering of participants within CCDs<sup>46</sup>. The sample was  
47 clustered within 11,621 CCDs (20 participants per CCD on average). CCDs accounted for 3.3% of the  
48 variation in psychological distress within a ‘null’ two-level multilevel model. A categorical variable  
49 identifying ethnic groups stratified by country of birth was fitted in this model, which was then  
50 adjusted for age and gender. We proceeded to test whether any ethnic differences in psychological  
51 distress remained significant after controlling for social interactions, other individual-level variables,  
52 local affluence and geographical remoteness. Multilevel logit regression was fitted to ethnic and  
53 country of birth-specific groups (i.e. stratified models) to investigate association between  
54 psychological distress and own-group ethnic density. To assess whether these associations could be  
55  
56  
57  
58  
59  
60

1  
2  
3 explained by social interactions, we first tested the extent of correlation between each measure and  
4 own-group ethnic density using negative-binomial regression (to account for the skewed distribution  
5 of the social interaction variables). Social interactions were then fitted into the logit models,  
6 followed by individual-level variables, local affluence and geographical remoteness. Interaction  
7 terms were fitted to test for potential synergistic effects between ethnic density and other  
8 neighbourhood variables. Statistically significant associations were identified using the log-  
9 likelihood ratio test ( $p < 0.05$ ). All analyses were conducted in STATA 12.  
10  
11

## 12 13 14 **RESULTS**

15  
16 Figure 1 reports differences in the age- and gender-adjusted prevalence of psychological distress by  
17 ethnicity and country of birth. The rate of high psychological distress was 11% for Australians born in  
18 Australia. In comparison, this risk was far higher for some groups, for example, 33% for the Lebanese  
19 born in Lebanon, but much lower for others, such as the Swiss born in Switzerland at 4%. There was  
20 no consistent effect of migrant status on the risk of psychological distress. For example, the  
21 prevalence of psychological distress among Croatians born in Croatia was 14.3% higher than their  
22 Australian born Croatian peers. In contrast, no substantive difference in the prevalence of  
23 psychological distress was reported among the Chinese, whether born in Australia (12.8%) or China  
24 (12.9%), and the Danish born in Australia had twice the risk of their Danish born contemporaries (10%  
25 to 5% respectively).  
26  
27  
28  
29  
30  
31  
32  
33

34 <Figure 1 here>  
35  
36  
37  
38  
39

40 Table 1 reports the percentage of each ethnic and country of birth group within the lowest quartile  
41 of the four social interactions measures. P-values for comparisons between ethnic and country of  
42 birth groups for each social interaction variable were calculated using logistic regression. Compared  
43 to their Australian-born peers, those born within their ethnic country of origin tended to be more  
44 prevalent in the lowest quartile of every measure of social interactions. For the variable denoting  
45 how many people a person felt they could rely on, within group differences were notably wide  
46 between the Australian-born and those born in the ethnic country of origin for the French (34.1%,  
47 52%), Polish (37.8%, 51%), Lebanese (26.2%, 45.7%) and Chinese (32.8%, 56.7%).  
48  
49  
50  
51  
52  
53  
54  
55  
56  
57  
58  
59  
60

**Table 1: Ethnic and country of birth differences in social interactions; percentage in the lowest quartile for each measure of social interactions**

| Ethnic group, country of birth | N (%)         | Social interactions                                  |                                       |                                          |                                 |
|--------------------------------|---------------|------------------------------------------------------|---------------------------------------|------------------------------------------|---------------------------------|
|                                |               | <i>Less likely to spend time with friends/family</i> | <i>Less likely to talk to someone</i> | <i>Less likely to go to social clubs</i> | <i>Few people can depend on</i> |
| Australia, Australia           | 61,848 (27.3) | 35.9 (35.51, 36.30)                                  | 26.1 (25.72, 26.45)                   | 42.1 (41.68, 42.51)                      | 30.5 (30.10, 30.88)             |
| Australian, Not Australia      | 1,383 (0.6)   | 37.9 (35.37, 40.54)                                  | 30.2 (27.85, 32.73)***                | 37.9 (35.37, 40.59)***                   | 36.7 (34.15, 39.28)***          |
| English, Australia             | 50,480 (22.3) | 35.6 (35.16, 36.03)                                  | 25.5 (25.06, 25.86)*                  | 41.3 (40.89, 41.80)*                     | 30.1 (29.64, 30.49)             |
| English, UK                    | 16,356 (7.2)  | 41.4 (40.66, 42.21)***                               | 28.5 (27.82, 29.24)***                | 43.9 (43.15, 44.73)***                   | 37.9 (37.17, 38.71)***          |
| Scottish, Australia            | 21,745 (9.6)  | 35.1 (34.47, 35.78)*                                 | 24.6 (24.06, 25.24)***                | 40.5 (39.86, 41.21)***                   | 29.2 (28.57, 29.81)***          |
| Scottish, UK                   | 3,759 (1.7)   | 37.8 (36.28, 39.43)*                                 | 27.8 (26.32, 29.23)*                  | 42.9 (41.28, 44.53)                      | 35.8 (34.26, 37.37)***          |
| Welsh, Australia               | 1,265 (0.6)   | 36.6 (33.99, 39.38)                                  | 25.0 (22.67, 27.51)                   | 40.3 (37.58, 43.11)                      | 30.0 (27.48, 32.58)             |
| Welsh, UK                      | 835 (0.4)     | 42.4 (39.06, 45.87)***                               | 28.9 (25.89, 32.12)                   | 44.6 (41.14, 48.05)                      | 38.0 (34.68, 41.35)***          |
| Irish, Australia               | 33,360 (14.7) | 35.0 (34.52, 35.58)**                                | 24.1 (23.58, 24.53)***                | 39.7 (39.20, 40.30)***                   | 30.4 (29.91, 30.94)             |
| Irish, Ireland                 | 1,048 (0.5)   | 40.9 (37.89, 43.92)***                               | 27.5 (24.90, 30.34)                   | 36.7 (33.71, 39.69)***                   | 36.3 (33.37, 39.25)***          |
| Danish, Australia              | 695 (0.3)     | 36.4 (32.84, 40.09)                                  | 24.7 (21.58, 28.11)                   | 37.7 (34.11, 41.46)*                     | 30.2 (26.88, 33.74)             |
| Danish, Denmark                | 178 (0.1)     | 49.0 (41.63, 56.43)***                               | 34.2 (27.55, 41.57)*                  | 55.3 (47.76, 62.56)***                   | 42.3 (35.15, 49.78)***          |
| French, Australia              | 1,195 (0.5)   | 37.9 (35.18, 40.77)                                  | 26.3 (23.78, 28.92)                   | 44.1 (41.20, 46.95)                      | 34.1 (31.46, 36.87)**           |
| French, France                 | 237 (0.1)     | 47.1 (40.76, 53.58)***                               | 29.9 (24.30, 36.10)                   | 53.4 (46.92, 59.85)***                   | 52.0 (45.51, 58.36)***          |
| Swiss, Australia               | 163 (0.1)     | 40.9 (33.48, 48.67)                                  | 23.5 (17.62, 30.70)                   | 49.7 (41.86, 57.48)                      | 34.5 (27.59, 42.20)             |
| Swiss, Switzerland             | 224 (0.1)     | 49.6 (43.01, 56.23)***                               | 35.8 (29.66, 42.36)***                | 51.1 (44.46, 57.77)***                   | 45.1 (38.62, 51.76)***          |
| German, Australia              | 9,894 (4.4)   | 36.1 (35.18, 37.11)                                  | 26.4 (25.49, 27.27)                   | 41.4 (40.41, 42.41)                      | 31.0 (30.12, 31.97)             |
| German, Germany                | 2,073 (0.9)   | 48.0 (45.82, 50.19)***                               | 35.4 (33.33, 37.54)***                | 50.6 (48.38, 52.79)***                   | 45.8 (43.63, 47.99)***          |
| Dutch, Australia               | 1,487 (0.7)   | 35.0 (32.61, 37.43)                                  | 27.8 (25.57, 30.11)                   | 41.6 (39.09, 44.15)                      | 31.2 (28.93, 33.65)             |
| Dutch, Netherlands             | 2,451 (1.1)   | 40.8 (38.88, 42.85)***                               | 30.7 (28.87, 32.57)***                | 42.4 (40.39, 44.43)                      | 37.7 (35.78, 39.68)***          |
| Spanish, Australia             | 316 (0.1)     | 40.8 (35.42, 46.36)                                  | 28.6 (23.72, 33.93)                   | 46.6 (41.05, 52.22)                      | 30.0 (25.15, 35.25)             |
| Spanish, Spain                 | 158 (0.1)     | 45.5 (37.82, 53.48)*                                 | 31.4 (24.55, 39.12)                   | 53.9 (45.89, 61.72)**                    | 47.3 (39.57, 55.25)***          |
| Italian, Australia             | 3,259 (1.4)   | 35.5 (33.88, 37.18)                                  | 25.8 (24.33, 27.34)                   | 41.2 (39.49, 42.93)                      | 32.0 (30.42, 33.66)             |
| Italian, Italy                 | 1,922 (0.9)   | 37.4 (35.21, 39.62)                                  | 29.5 (27.48, 31.58)***                | 48.1 (45.84, 50.43)***                   | 36.5 (34.36, 38.75)***          |
| Greek, Australia               | 1,072 (0.5)   | 34.1 (31.36, 37.03)                                  | 21.2 (18.92, 23.75)***                | 44.0 (40.98, 47.03)                      | 30.1 (27.44, 32.96)             |
| Greek, Greece                  | 696 (0.3)     | 38.6 (35.02, 42.39)                                  | 30.5 (27.14, 34.09)**                 | 45.8 (42.01, 49.61)                      | 44.4 (40.63, 48.14)***          |
| Polish, Australia              | 1,111 (0.5)   | 39.0 (36.14, 41.91)*                                 | 28.7 (26.05, 31.41)                   | 41.8 (38.86, 44.72)                      | 37.8 (34.94, 40.70)***          |
| Polish, Poland                 | 471 (0.2)     | 47.5 (42.98, 52.12)***                               | 38.7 (34.31, 43.27)***                | 46.4 (41.80, 51.06)                      | 51.0 (46.37, 55.52)***          |
| Maltese, Australia             | 675 (0.3)     | 35.0 (31.53, 38.66)                                  | 28.8 (25.49, 32.29)                   | 41.1 (37.47, 44.93)                      | 29.2 (25.94, 32.79)             |
| Maltese, Malta                 | 715 (0.3)     | 38.7 (35.19, 42.43)                                  | 30.1 (26.78, 33.57)*                  | 38.9 (35.29, 42.59)                      | 38.9 (35.31, 42.57)***          |
| Lebanese, Australia            | 461 (0.2)     | 34.0 (29.83, 38.49)                                  | 23.5 (19.81, 27.54)                   | 37.5 (33.16, 42.06)*                     | 26.2 (22.35, 30.39)*            |
| Lebanese, Lebanon              | 567 (0.3)     | 30.9 (27.24, 34.78)*                                 | 29.6 (25.99, 33.43)                   | 41.4 (37.34, 45.56)                      | 45.7 (41.56, 49.89)***          |
| Croatian, Australia            | 218 (0.1)     | 37.3 (31.12, 43.93)                                  | 22.9 (17.83, 28.92)                   | 44.9 (38.34, 51.74)                      | 34.3 (28.32, 40.93)             |
| Croatian, Croatia              | 349 (0.2)     | 43.4 (38.20, 48.74)**                                | 40.8 (35.63, 46.14)***                | 47.3 (42.00, 52.68)                      | 48.0 (42.75, 53.36)***          |
| Indian, Australia              | 213 (0.1)     | 39.0 (32.60, 45.72)                                  | 20.8 (15.90, 26.69)                   | 43.6 (36.97, 50.42)                      | 32.3 (26.38, 38.90)             |
| Indian, India                  | 668 (0.3)     | 47.7 (43.91, 51.61)***                               | 26.3 (23.12, 29.66)                   | 26.5 (23.29, 29.88)***                   | 39.4 (35.66, 43.18)***          |
| Chinese, Australia             | 690 (0.3)     | 39.3 (35.68, 43.03)                                  | 28.7 (25.41, 32.24)                   | 40.5 (36.80, 44.23)                      | 32.8 (29.36, 36.41)             |
| Chinese, China                 | 2,250 (1.0)   | 53.5 (51.40, 55.62)***                               | 40.5 (38.42, 42.57)***                | 42.5 (40.42, 44.59)                      | 56.7 (54.62, 58.82)***          |

\*\*\* p < 0.001; \*\* p < 0.01; \* p < 0.05 (from Australian, Australia)

Table 2 reports results from multilevel logit regression. Model 1 reports ethnic and country of birth differences in psychological distress, adjusted for age and gender (sensu Figure 1). We adjusted this model for each social interaction variable individually, and then simultaneously (Model 2). Higher quartiles of each social interaction variable were associated with a lower risk of psychological distress; especially that denoting the number of people that can be relied on (highest quartile odds ratio: 0.36, 95% confidence interval: 0.34, 0.38). Social interactions only fully explained the higher risk of psychological distress experienced by the Chinese born in China (as denoted by statistical

significance). However, there were other instances where odds ratios were attenuated, though remained significant, and this was often for people born outside Australia, such as the Lebanese born in Lebanon (OR=3.97 to 3.67) and the Croatians born in Croatia (OR=2.70 to 2.30). Adjusting for all other individual-level characteristics, neighbourhood affluence and geographical remoteness (Model 3) had a more substantive effect on the ethnic differences (OR=3.67 to 2.11 for the Lebanese born in Lebanon; OR=2.30 to 1.84 for the Croatians born in Croatia).

**Table 2: Ethnic and country of birth group differences in the risk of psychological distress, adjusted for social interactions variables and other individual and neighbourhood characteristics**

| Ethnicity, country of birth                      | Model 1                              | Model 2              | Model 3              |
|--------------------------------------------------|--------------------------------------|----------------------|----------------------|
|                                                  | Odds Ratio (95% Confidence Interval) |                      |                      |
| Australian, Australia                            | 1                                    | 1                    | 1                    |
| Australian, Not Australia                        | 1.83 (1.59, 2.10)***                 | 1.73 (1.50, 1.99)*** | 1.57 (1.36, 1.82)*** |
| English, Australia                               | 0.93 (0.90, 0.97)***                 | 0.94 (0.90, 0.98)*** | 0.96 (0.92, 1.00)*   |
| English, UK                                      | 0.83 (0.78, 0.88)***                 | 0.75 (0.71, 0.80)*** | 0.82 (0.77, 0.87)*** |
| Scottish, Australia                              | 0.89 (0.84, 0.93)***                 | 0.90 (0.86, 0.95)*** | 0.96 (0.91, 1.01)    |
| Scottish, UK                                     | 0.81 (0.72, 0.90)***                 | 0.76 (0.68, 0.85)*** | 0.82 (0.73, 0.92)*** |
| Welsh, Australia                                 | 1.10 (0.93, 1.31)                    | 1.12 (0.94, 1.33)    | 1.19 (1.00, 1.42)    |
| Welsh, UK                                        | 0.82 (0.65, 1.04)                    | 0.75 (0.60, 0.95)*   | 0.84 (0.66, 1.07)    |
| Irish, Australia                                 | 0.95 (0.91, 0.99)*                   | 0.96 (0.92, 1.01)    | 0.99 (0.95, 1.04)    |
| Irish, Ireland                                   | 0.93 (0.76, 1.13)                    | 0.87 (0.71, 1.06)    | 0.92 (0.75, 1.12)    |
| Danish, Australia                                | 0.90 (0.70, 1.15)                    | 0.91 (0.71, 1.17)    | 0.94 (0.73, 1.21)    |
| Danish, Denmark                                  | 0.43 (0.22, 0.84)*                   | 0.36 (0.18, 0.71)**  | 0.38 (0.19, 0.77)**  |
| French, Australia                                | 1.04 (0.87, 1.24)                    | 1.01 (0.84, 1.21)    | 0.99 (0.83, 1.19)    |
| French, France                                   | 1.08 (0.73, 1.60)                    | 0.87 (0.58, 1.29)    | 1.00 (0.67, 1.51)    |
| Swiss, Australia                                 | 1.01 (0.62, 1.65)                    | 1.00 (0.61, 1.63)    | 1.14 (0.69, 1.88)    |
| Swiss, Switzerland                               | 0.33 (0.17, 0.65)***                 | 0.27 (0.14, 0.53)*** | 0.33 (0.17, 0.65)*** |
| German, Australia                                | 1.12 (1.05, 1.19)***                 | 1.11 (1.04, 1.19)*** | 1.10 (1.02, 1.17)**  |
| German, Germany                                  | 0.98 (0.86, 1.13)                    | 0.82 (0.71, 0.94)**  | 0.87 (0.75, 1.00)*   |
| Dutch, Australia                                 | 1.03 (0.88, 1.22)                    | 1.02 (0.87, 1.20)    | 1.07 (0.90, 1.27)    |
| Dutch, Netherlands                               | 0.96 (0.85, 1.09)                    | 0.88 (0.78, 1.01)    | 0.91 (0.80, 1.04)    |
| Spanish, Australia                               | 1.08 (0.77, 1.52)                    | 1.08 (0.76, 1.52)    | 0.92 (0.64, 1.33)    |
| Spanish, Spain                                   | 1.35 (0.87, 2.11)                    | 1.14 (0.73, 1.79)    | 1.06 (0.67, 1.67)    |
| Italian, Australia                               | 1.05 (0.94, 1.18)                    | 1.04 (0.93, 1.17)    | 1.07 (0.96, 1.21)    |
| Italian, Italy                                   | 1.79 (1.59, 2.02)***                 | 1.68 (1.49, 1.89)*** | 1.46 (1.29, 1.65)*** |
| Greek, Australia                                 | 1.07 (0.88, 1.29)                    | 1.08 (0.89, 1.30)    | 1.11 (0.91, 1.35)    |
| Greek, Greece                                    | 2.04 (1.69, 2.46)***                 | 1.81 (1.50, 2.19)*** | 1.33 (1.10, 1.62)**  |
| Polish, Australia                                | 1.17 (0.98, 1.40)                    | 1.10 (0.92, 1.32)    | 1.15 (0.95, 1.39)    |
| Polish, Poland                                   | 1.89 (1.51, 2.37)***                 | 1.54 (1.22, 1.94)*** | 1.64 (1.30, 2.08)*** |
| Maltese, Australia                               | 1.26 (1.01, 1.57)*                   | 1.27 (1.01, 1.59)*   | 1.11 (0.88, 1.41)    |
| Maltese, Malta                                   | 1.71 (1.41, 2.09)***                 | 1.59 (1.30, 1.94)*** | 1.19 (0.97, 1.46)    |
| Lebanese, Australia                              | 1.13 (0.85, 1.50)                    | 1.22 (0.92, 1.62)    | 1.31 (0.98, 1.75)    |
| Lebanese, Lebanon                                | 3.97 (3.30, 4.76)***                 | 3.67 (3.04, 4.42)*** | 2.11 (1.73, 2.57)*** |
| Croatian, Australia                              | 0.97 (0.63, 1.49)                    | 0.94 (0.61, 1.46)    | 1.00 (0.64, 1.56)    |
| Croatian, Croatia                                | 2.70 (2.11, 3.46)***                 | 2.30 (1.78, 2.96)*** | 1.84 (1.42, 2.39)*** |
| Indian, Australia                                | 1.86 (1.31, 2.63)***                 | 1.88 (1.33, 2.68)*** | 1.64 (1.14, 2.35)**  |
| Indian, India                                    | 1.13 (0.89, 1.43)                    | 1.07 (0.84, 1.36)    | 1.43 (1.12, 1.83)**  |
| Chinese, Australia                               | 1.18 (0.94, 1.48)                    | 1.16 (0.92, 1.45)    | 1.18 (0.93, 1.50)    |
| Chinese, China                                   | 1.19 (1.05, 1.35)**                  | 0.90 (0.79, 1.02)    | 1.05 (0.92, 1.20)    |
| Number of occasions spent with friends or family |                                      |                      |                      |
| Quartile 1 (Low)                                 |                                      | 1                    | 1                    |
| Quartile 2 (Low to Moderate)                     |                                      | 0.77 (0.74, 0.81)*** | 0.78 (0.75, 0.82)*** |
| Quartile 3 (Moderate to High)                    |                                      | 0.80 (0.77, 0.83)*** | 0.78 (0.75, 0.81)*** |
| Quartile 4 (High)                                |                                      | 1.00 (0.97, 1.04)    | 0.89 (0.85, 0.92)*** |
| Number of telephone conversations                |                                      |                      |                      |
| Quartile 1 (Low)                                 |                                      | 1                    | 1                    |
| Quartile 2 (Low to Moderate)                     |                                      | 0.77 (0.74, 0.80)*** | 0.82 (0.79, 0.85)*** |
| Quartile 3 (Moderate to High)                    |                                      | 0.79 (0.76, 0.82)*** | 0.83 (0.80, 0.87)*** |
| Quartile 4 (High)                                |                                      | 0.78 (0.75, 0.81)*** | 0.85 (0.82, 0.88)*** |



| Number of visits to social clubs       |                      |                      |
|----------------------------------------|----------------------|----------------------|
| Quartile 1 (Low)                       | 1                    | 1                    |
| Quartile 2 (Low to Moderate)           | 0.75 (0.72, 0.78)*** | 0.86 (0.83, 0.90)*** |
| Quartile 3 (Moderate to High)          | 0.77 (0.74, 0.80)*** | 0.88 (0.84, 0.91)*** |
| Quartile 4 (High)                      | 0.95 (0.92, 0.98)**  | 1.01 (0.97, 1.04)    |
| Number of people that can be relied on |                      |                      |
| Quartile 1 (Low)                       | 1                    | 1                    |
| Quartile 2 (Low to Moderate)           | 0.58 (0.56, 0.61)*** | 0.66 (0.63, 0.68)*** |
| Quartile 3 (Moderate to High)          | 0.48 (0.47, 0.50)*** | 0.56 (0.54, 0.58)*** |
| Quartile 4 (High)                      | 0.36 (0.34, 0.38)*** | 0.44 (0.42, 0.46)*** |

\* p < 0.05; \*\* p < 0.01; \*\*\* p < 0.001

Model 1: Multilevel logit regression, adjusted for age and gender

Model 2: Model 1 + social interactions

Model 3: Model 2 + other individual-level variables, neighbourhood affluence and geographical remoteness

Figure 2 illustrates the ethnic and country of birth group differences in own-group ethnic density. Regardless of whether participants were born in Australia or the UK, those identifying as Australian (32.6%) or English (35.1%) ethnicities lived in the most ethnically dense neighbourhoods. Compared to the Australians and the English, the clustering of other ethnic groups in NSW was much lower. The highest mean ethnic density for non-Australian and non-English groups was for the Chinese born in China at 14.9%, whereas the lowest was for Australian born Swiss at 0.1%. There was evidence of heterogeneity of mean ethnic density within some groups. For example, Italians born in Australia had a mean of ethnic density of 4.9% but Italian-born Italians had 7.7%. Similar patterns were observed for Greeks, the Chinese and the Lebanese.

<Figure 2 here>

For the next stage of analysis we investigated the level of association with own-group ethnic density. This necessitated stratification of the sample by ethnic and country of birth group to match each individual with the relevant ethnic density measure. For example, Chinese ethnic density was matched to Chinese individuals (irrespective of whether they were born in China or Australia). We conducted these analyses for all groups, but due to space constraints, we focus our report on groups that have a mean ethnic density of 2% or more: Australians, English, Scottish, Irish, German, Italian, Greek, Lebanese, and Chinese. Table 3 reports mostly weak and positive or null (i.e.  $p > 0.05$ ) correlations between own group ethnic density and each of the social interactions variables. The most consistent set of correlations were for the social interactions variable which indicated how many people could be relied on within a one-hour travel-time.

**Table 3: Correlations between own group ethnic density and each of the social interactions variables, stratified by ethnic and country of birth group**

| Ethnic group, country of birth | How many times last week did you:                              |                                                       |                                                                                       | How many people outside your home, within one hour of travel, do you feel you can depend on |
|--------------------------------|----------------------------------------------------------------|-------------------------------------------------------|---------------------------------------------------------------------------------------|---------------------------------------------------------------------------------------------|
|                                | <i>Spend time with friends/family who do not live with you</i> | <i>Talk to someone (friends, relatives or others)</i> | <i>Go to meetings of social clubs, religious groups or other groups you belong to</i> |                                                                                             |
| Australia, Australia           | 0.012**                                                        | -0.017***                                             | -0.012**                                                                              | 0.008*                                                                                      |
| Australian, Not Australia      | -0.010                                                         | -0.053*                                               | 0.005                                                                                 | -0.001                                                                                      |
| English, Australia             | 0.019***                                                       | 0.001                                                 | 0.013**                                                                               | -0.001                                                                                      |
| English, UK                    | 0.0156                                                         | -0.010                                                | 0.029**                                                                               | 0.006                                                                                       |
| Scottish, Australia            | 0.007                                                          | 0.008                                                 | 0.001                                                                                 | 0.014*                                                                                      |
| Scottish, UK                   | 0.036*                                                         | 0.029                                                 | -0.007                                                                                | 0.031                                                                                       |
| Irish, Australia               | 0.005                                                          | 0.009                                                 | -0.001                                                                                | 0.005                                                                                       |
| Irish, Ireland                 | -0.014                                                         | -0.012                                                | 0.019                                                                                 | -0.027                                                                                      |
| German, Australia              | -0.002                                                         | -0.016                                                | 0.016                                                                                 | 0.024*                                                                                      |
| German, Germany                | -0.022                                                         | 0.020                                                 | -0.004                                                                                | 0.057**                                                                                     |
| Italian, Australia             | 0.018                                                          | -0.028                                                | -0.035*                                                                               | 0.049**                                                                                     |
| Italian, Italy                 | 0.028                                                          | 0.025                                                 | 0.045                                                                                 | 0.086**                                                                                     |
| Greek, Australia               | 0.066*                                                         | -0.032                                                | -0.028                                                                                | 0.117**                                                                                     |
| Greek, Greece                  | 0.012                                                          | -0.026                                                | 0.052                                                                                 | 0.017                                                                                       |
| Lebanese, Australia            | -0.033                                                         | 0.047                                                 | 0.055                                                                                 | 0.273***                                                                                    |
| Lebanese, Lebanon              | -0.029                                                         | 0.009                                                 | -0.061                                                                                | -0.031                                                                                      |
| Chinese, Australia             | 0.048                                                          | -0.015                                                | 0.008                                                                                 | -0.059                                                                                      |
| Chinese, China                 | 0.036                                                          | 0.033                                                 | 0.082**                                                                               | -0.007                                                                                      |

\* p < 0.05; \*\* p < 0.01; \*\*\* p < 0.001

Table 4 reports the results of these ethnic and county of birth group specific models. Model 1 fitted the association between psychological distress and own-group ethnic density, adjusted for age and gender. A 1% increase in own-group ethnic density appeared protective against psychological distress for the English born in UK, and Australian-born Scottish, Irish and Chinese. Unexpectedly, increasing ethnic density was associated with a higher risk of psychological distress among Australians born in Australia. This model was adjusted by the social interactions variables (Model 2), but the associations between ethnic density and psychological distress persisted. Further adjustment for other individual-level variables, local affluence and geographical remoteness (Model 3) had a more substantial attenuating influence on the ethnic density odds ratios and 95% confidence intervals, except that for the English born in the UK and the overseas-born Australians. We did not find any evidence of interactions between ethnic density and any other independent variables in our models. **Results from the imputed data set were similar to those from complete-case analysis.**

**Table 4: Association between own-group ethnic density and psychological distress by ethnic group, adjusting for social interactions and other individual and neighbourhood characteristics: Odds Ratios (95% Confidence Intervals)**

|  | Model 1 | Model 2 | Model 3 |
|--|---------|---------|---------|
|--|---------|---------|---------|

|                           | OR (95% CI)             |                         |                        |
|---------------------------|-------------------------|-------------------------|------------------------|
| Australian, Australia     | 1.011 (1.008, 1.014)*** | 1.010 (1.007, 1.014)*** | 1.000 (0.997, 1.004)   |
| Australian, not Australia | 0.974 (0.959, 0.988)*** | 0.976 (0.961, 0.991)**  | 0.973 (0.955, 0.991)** |
| English, Australia        | 1.000 (0.996, 1.003)    | 1.000 (0.996, 1.004)    | 0.998 (0.994, 1.002)   |
| English, UK               | 0.992 (0.986, 0.999)*   | 0.993 (0.987, 1.000)*   | 0.992 (0.985, 0.999)*  |
| Scottish, Australia       | 0.972 (0.945, 1.000)*   | 0.979 (0.951, 1.007)    | 0.986 (0.957, 1.015)   |
| Scottish, UK              | 0.982 (0.913, 1.057)    | 0.991 (0.921, 1.067)    | 1.002 (0.929, 1.081)   |
| Irish, Australia          | 0.977 (0.962, 0.992)**  | 0.980 (0.965, 0.995)**  | 0.998 (0.983, 1.014)   |
| Irish, Ireland            | 0.940 (0.861, 1.026)    | 0.946 (0.863, 1.038)    | 0.965 (0.868, 1.073)   |
| German, Australia         | 0.987 (0.949, 1.028)    | 0.994 (0.954, 1.036)    | 1.000 (0.959, 1.042)   |
| German, Germany           | 0.999 (0.901, 1.107)    | 1.004 (0.905, 1.115)    | 1.002 (0.895, 1.121)   |
| Italian, Australia        | 0.991 (0.973, 1.009)    | 0.994 (0.977, 1.012)    | 1.013 (0.992, 1.034)   |
| Italian, Italy            | 0.998 (0.985, 1.011)    | 1.002 (0.989, 1.016)    | 1.003 (0.988, 1.017)   |
| Greek, Australia          | 0.983 (0.943, 1.024)    | 0.994 (0.955, 1.035)    | 1.006 (0.963, 1.052)   |
| Greek, Greece             | 1.009 (0.987, 1.032)    | 1.011 (0.989, 1.034)    | 1.005 (0.979, 1.032)   |
| Lebanese, Australia       | 1.008 (0.954, 1.065)    | 1.038 (0.981, 1.099)    | 0.983 (0.913, 1.057)   |
| Lebanese, Lebanon         | 1.025 (0.999, 1.051)    | 1.023 (0.995, 1.051)    | 1.012 (0.983, 1.042)   |
| Chinese, Australia        | 0.897 (0.812, 0.990)*   | 0.861 (0.760, 0.975)*   | 0.884 (0.699, 1.116)   |
| Chinese, China            | 1.003 (0.992, 1.014)    | 1.004 (0.993, 1.014)    | 0.999 (0.988, 1.011)   |

\* p < 0.05; \*\* p < 0.01; \*\*\* p < 0.001

Model 1: Adjusted for age and gender

Model 2: Model 1 + social interactions

Model 3: Model 2 + individual characteristics, neighbourhood affluence and geographical remoteness

## DISCUSSION

This paper examined the relationship between ethnic density and psychological distress in one of the most ethnic diverse areas of Australia. We found substantive heterogeneity in the risk of psychological distress between and within ethnic groups. Ethnic differences in social interactions, individual and neighbourhood characteristics did not explain the ethnic differences in the risk of psychological distress. More social interactions were associated with a lower risk of psychological distress, especially the number of people study participants felt they could rely on. Increasing own-group ethnic density was associated more social interactions and less psychological distress for some ethnic groups, but not all. However, it was the characteristics of individuals and the neighbourhoods in which they lived, not the social interactions, which mostly explained the ethnic density effects on psychological distress. Only the English born in the UK and the overseas-born Australians appeared to benefit from ethnic density after controlling for all other characteristics.

Although there are many studies on ethnic density and mental health<sup>4 6 10-18</sup>, only two others have tested whether this relationship is explained by social interactions. A UK study<sup>10</sup> found a lower risk of common mental disorders for the Irish and for the Bangladeshi groups they studied in more

1  
2  
3 ethnically dense neighbourhoods. This was not fully explained by measures of practical and  
4 emotional social support. Contrary to the ethnic density hypothesis, this study also reported  
5 significantly higher risk of common mental disorders among white British in ethnically dense  
6 neighbourhoods. A study in the US<sup>11</sup> also showed the benefits of living in a higher own-ethnic group  
7 density neighbourhoods for the emotional well-being of Black and Hispanic groups. Measures of  
8 personal and neighbourhood social support partially explained the relationship for Blacks but not  
9 among Hispanics. Therefore, despite using contrasting measures of mental health and social  
10 interactions for different ethnic groups in the UK, US and Australia, our findings are consistent  
11 wherein social interactions only played a weak role in explaining the ethnic density effect on mental  
12 health.  
13  
14  
15

16 A particular strength of our study includes the large sample sizes for many different ethnic groups;  
17 more than has been possible to analyse in previous studies<sup>4</sup>. This allowed stratification by country  
18 of birth, which afforded new insights into the heterogeneity of mental health, social interactions and  
19 ethnic density within groups. It is noteworthy that levels of ethnic density varied considerably by  
20 country of birth within some ethnic groups (e.g. the Chinese), though not all (e.g. the English). Given  
21 the general supposition that higher levels of ethnic density are better for mental health, it could be  
22 argued that for many groups, levels of ethnic density do not achieve a sufficient concentration  
23 necessary for health promotion in this sample. This hypothesis is not convincing, however, when  
24 one considers that no association between ethnic density and psychological distress was found for  
25 the Chinese born in China, who reported a mean ethnic density of approximately 15% and a  
26 maximum of nearly 80%, but there was an association among the Chinese born in Australia, for  
27 whom the mean ethnic density was about 5% and a maximum of around 63%. Likewise, there  
28 appeared to be a benefit of ethnic density for the UK-born English, but not the English born in  
29 Australia, despite having very similar levels of own-group ethnic density. As such, it would appear  
30 that a more nuanced approach may be required in future, using other sources of administrative data  
31 and qualitative methods to examine what it is about ethnically dense neighbourhoods which  
32 promote better mental health in some ethnic groups, but not all.  
33  
34  
35  
36  
37

38 Our measures of psychological distress and social interactions have been widely validated. The small  
39 geographical scale (CCD) used to construct ethnic density provided a more accurate description of  
40 local circumstances than previous work which has relied upon larger spatial scales, helping to  
41 identify small 'pockets' of ethnic density and affluence that would otherwise have been hidden<sup>47</sup>.  
42 The focus on small scale geography is an advantage, though our study shares a common limitation  
43 among others of this genre in the reliance upon administrative boundaries, which are unlikely to  
44 perfectly correlate with residents' perceptions of neighbourhood<sup>48</sup>. **Such perceptions may vary  
45 depending upon location, circumstances and individual characteristics; including ethnicity.  
46 Therefore, it would appear that future research may need to explore the ethnic density hypothesis  
47 with customised measures of neighbourhood scale.**  
48  
49  
50

51 It is reasonable to expect that social support from the neighbourhood would be reflected in the four  
52 measures of social interactions used in the study, albeit imperfectly. Social clubs attended, for  
53 example, may be located in the neighbourhood and many of the people who can be relied on within  
54 one hour of travel may in fact live much closer. The limitation, however, is that the questions used  
55 in the 45 and Up Study did not ask participants to distinguish how many of these interactions  
56 occurred within versus outside the neighbourhood in which they lived. It would be useful for further  
57  
58  
59  
60

1  
2  
3 work, therefore, to examine indicators which specify neighbourhood parameters within the question.  
4 Another limitation was that the 45 and Up Study was sampled from the Medicare Australia database  
5 which mainly includes Australian citizens and migrants on permanent residency visas. Only some  
6 migrants on temporary visas are included on this scheme and this is likely to mean that some ethnic  
7 minorities were not represented in our study. Representativeness is also a concern for a dataset  
8 wherein the response rate was only 18%, although comparisons between the 45 and Up Study and a  
9 'representative' dataset have helped to alleviate these concerns to some extent <sup>27</sup>. **However, the**  
10 **comparisons in the aforementioned study did find heterogeneity between psychological distress**  
11 **and English spoken at home, and did not have an explicit focus on ethnic differences. Although**  
12 **regression methods are robust to missing data assumptions, there is still the possibility of bias.**  
13 The 45 and Up Study asked participants about Aboriginal and Torres Strait Islander origin, though  
14 responses to this variable were not available for this investigation and are the focus of a follow-up  
15 study. Many studies have suggested that spatial variation in the experiences of racism could help to  
16 explain the ethnic density effect <sup>14 16</sup>. Although we had no measure of racism in our study, virtually  
17 all benefits of ethnic density were already explained by other individual characteristics. Finally, our  
18 study represents only people 45 years and older, so it cannot discount the possibility of different  
19 patterns for younger age groups.  
20  
21  
22  
23  
24  
25  
26  
27  
28  
29  
30  
31  
32  
33  
34  
35  
36  
37  
38  
39  
40  
41  
42  
43  
44  
45  
46  
47  
48  
49  
50  
51  
52  
53  
54  
55  
56  
57  
58  
59  
60

## CONCLUSION

Ethnic groups in New South Wales, Australia, experience substantively different risks of psychological distress. These differences also align by country of birth, though there is no consistent pattern. Increasing social interactions, particularly those which help people to develop relationships with others they can depend on in times of need, are beneficial for mental health regardless of ethnicity and country of birth. In comparison, the ethnic density of where people live was protective only for the UK-born English and the overseas-born Australians.

## ACKNOWLEDGEMENTS, COMPETING INTERESTS & FUNDING

We thank all of the men and women who participated in the 45 and Up Study. The 45 and Up Study is managed by the Sax Institute in collaboration with major partner Cancer Council New South Wales; and partners the Heart Foundation (NSW Division); NSW Ministry of Health; *beyondblue: the national depression initiative*; Ageing, Disability and Home Care, NSW Family and Community Services; and the Australian Red Cross Blood Service. We acknowledge the use of 2006 census and boundary data provided by the Australian Bureau of Statistics. To preserve the anonymity of participants in The 45 and Up Study, some parameters of the Census Collector District (CCD) level data cannot be reported. This location-indexing data from the 45 and up Study is highly restricted access and will be made available only through SURE (<https://www.sure.org.au/>).

The authors have no competing interests.

No funding was sought for this study.

### Contributorship

Feng and Astell-Burt designed the analyses for the study, which utilised an existing dataset. Feng carried out the analyses and wrote the paper draft. All authors have commented on, edited and approved the final draft.

### Data sharing

No additional data is available.

## LIST OF FIGURES

Figure 1: Ethnic and country of birth differences in the rate of psychological distress (Kessler scores of 22 and over), adjusted for age and gender

Figure 2: Ethnic and country of birth differences in mean own-group ethnic density (percentage) at the Census Collection District (CCD) scale, with minimum and maximum: sorted highest to lowest

## REFERENCES

1. Vega W, Rumbaut R. Ethnic minorities and mental health. *Annual Review of Sociology* 1991;17:351-83.
2. Nazroo JY. Ethnicity and Mental Health: Findings from a National Community Survey. London: Policy Studies Institute, 1997.
3. Sproston K, Nazroo J. *Ethnic Minority Psychiatric Illness Rates in the Community (EMPIRIC)*. London: TSO, 2002.
4. Shaw RJ, Atkin K, Bécares L, et al. Impact of ethnic density on adult mental disorders: narrative review. *The British Journal of Psychiatry* 2012;201(1):11-19.
5. Paradies Y. A systematic review of empirical research on self-reported racism and health. *International Journal of Epidemiology* 2006;35:888-901.
6. Pickett K, Wilkinson R. People like us: ethnic group density effects on health. *Ethnicity and Health* 2008;13(4):321-34.
7. Letki N. Does diversity erode social cohesion? Social capital and race in British neighbourhoods. *Political Studies* 2008;56(1):99-126.
8. Twigg L, Taylor J, Mohan J. Diversity or disadvantage? Putnam, Goodhart, ethnic heterogeneity, and collective efficacy. *Environment and Planning A* 2010;42(6):1421-38.
9. Bécares L, Stafford M, Laurence J, et al. Composition, Concentration and Deprivation Exploring their Association with Social Cohesion among Different Ethnic Groups in the UK. *Urban Studies* 2011;48(13):2771-87.
10. Das-Munshi J, Becares L, Dewey ME, et al. Understanding the effect of ethnic density on mental health: multi-level investigation of survey data from England. *BMJ: British Medical Journal* 2010;341.
11. Yuan ASV. Racial composition of neighborhood and emotional well-being. *Sociological Spectrum* 2007;28(1):105-29.
12. Pickett KE, Shaw RJ, Atkin K, et al. Ethnic density effects on maternal and infant health in the Millennium Cohort Study. *Social Science & Medicine* 2009;69(10):1476-83.
13. Becares L, Nazroo J, Jackson J, et al. Ethnic density effects on health and experienced racism among Caribbean people in the US and England: A cross-national comparison. *Social Science & Medicine* 2012.
14. Becares L, Nazroo J, Stafford M. The buffering effects of ethnic density on experienced racism and health. *Health & Place* 2009;15(3):670-8.
15. Stafford M, Becares L, Nazroo J. Objective and Perceived Ethnic Density and Health: Findings From a United Kingdom General Population Survey. *American Journal of Epidemiology* 2009;170(4):484-93.
16. Astell-Burt T, Maynard MJ, Lenguerrand E, et al. Racism, ethnic density and psychological well-being through adolescence: evidence from the Determinants of Adolescent Social well-being and Health longitudinal study. *Ethnicity and Health* 2012;17:71-87.
17. Gieling M, Vollebergh W, van Dorsselaer S. Ethnic density in school classes and adolescent mental health. *Soc Psychiatry Psychiatr Epidemiol* 2009.
18. Xue Y, Leventhal T, Brooks-Gunn J, et al. Neighborhood residence and mental health problems of 5-to 11-year-olds. *Archives of General Psychiatry* 2005;62(5):554.
19. Krupinski J. *Psychological maladaptations in ethnic concentrations in Victoria*: Australian National Association for Mental Health, 1975.
20. Australian Bureau of Statistics. *A Picture of the Nation: The Statistician's Report on the 2006 Census*. Canberra: Australian Government, 2006.
21. Anikeeva O, Bi P, Hiller JE, v. The Health Status of Migrants in Australia: A Review. *Asia-Pacific Journal of Public Health* 2010;22(2):159-93.
22. Thorburn A. Prevalence of obesity in Australia. *Obesity reviews* 2005;6(3):187-89.
23. Johnston R, Forrest J, Poulsen M. Sydney's ethnic geography: new approaches to analysing patterns of residential concentration. *Australian Geographer* 2001;32(2):149-62.

- 1
- 2
- 3 24. Poulsen M, Johnston R, Forrest J. Is Sydney a divided city ethnically? *Australian geographical studies* 2004;42(3):356-77.
- 4
- 5 25. Dunn KM. Rethinking ethnic concentration: the case of Cabramatta, Sydney. *Urban Studies*
- 6 1998;35(3):503-27.
- 7
- 8 26. Banks E, Redman S, Jorm L, et al. Cohort profile: the 45 and up study. *International Journal of*
- 9 *Epidemiology* 2008;37(5):941.
- 10
- 11 27. Mealing NM, Banks E, Jorm LR, et al. Investigation of relative risk estimates from studies of the
- 12 same population with contrasting response rates and designs. *BMC medical research*
- 13 *methodology* 2010;10(1):26.
- 14
- 15 28. Kessler RC, Andrews G, Colpe LJ, et al. Short screening scales to monitor population prevalences
- 16 and trends in non-specific psychological distress. *Psychological Medicine* 2002;32:959-76.
- 17
- 18 29. Furukawa TA, Kessler RC, Slade T, et al. The performance of the K6 and K10 screening scales for
- 19 psychological distress in the Australian National Survey of Mental Health and Well-Being.
- 20 *Psychological Medicine* 2003;33(2):357-62.
- 21
- 22 30. Breslau J, Aguilar-Gaxiola S, Kendler KS, et al. Specifying race-ethnic differences in risk for
- 23 psychiatric disorder in a USA national sample. *Psychological Medicine* 2006;36(1):57-68.
- 24
- 25 31. Carrà G, Sciarini P, Segagni-Lusignani G, et al. Do they actually work across borders? Evaluation of
- 26 two measures of psychological distress as screening instruments in a non Anglo-Saxon
- 27 country. *European Psychiatry* 2011;26(2):122-27.
- 28
- 29 32. Furukawa TA, Kawakami N, Saitoh M, et al. The performance of the Japanese version of the K6
- 30 and K10 in the World Mental Health Survey Japan. *International journal of methods in*
- 31 *psychiatric research* 2008;17(3):152-58.
- 32
- 33 33. Australian Bureau of Statistics. *Information paper: use of the Kessler Psychological Distress Scale*
- 34 *in ABS Health Surveys, Australia*. Canberra: Australian Bureau of Statistics, 2003.
- 35
- 36 34. Banks E, Byles JE, Gibson RE, et al. Is psychological distress in people living with cancer related to
- 37 the fact of diagnosis, current treatment or level of disability? Findings from a large Australian
- 38 study. *Medical Journal of Australia* 2010;193(5):92.
- 39
- 40 35. Byles JE, Gallienne L, Blyth FM, et al. Relationship of age and gender to the prevalence and
- 41 correlates of psychological distress in later life. *International Psychogeriatrics* 2012;1(1):1-10.
- 42
- 43 36. George ES, Jorm L, Kolt GS, et al. Physical Activity and Psychological Distress in Older Men:
- 44 Findings From the New South Wales 45 and Up Study. *Journal of Aging and Physical Activity*
- 45 2012;20:300-16.
- 46
- 47 37. Koenig HG, Westlund RE, George LK, et al. Abbreviating the Duke Social Support Index for use in
- 48 chronically ill elderly individuals. *Psychosomatics* 1993;34:61-69.
- 49
- 50 38. Howe C, Matthews LR, Heard R. Work to retirement: a snapshot of psychological health in a
- 51 multicultural Australian population. *Work* 2010;36:119-27.
- 52
- 53 39. Pachana NA, Smith N, Watson M, et al. Responsiveness of the Duke Social Support sub-scales in
- 54 older women. *Age & Ageing* 2008;37:666-72.
- 55
- 56 40. Chiew M, Weber M, Egger S, et al. A cross-sectional exploration of smoking status and social
- 57 interaction in a large population-based Australian cohort. *Social Science & Medicine*
- 58 2012;75(1):77-86.
- 59
- 60 41. Australian Bureau of Statistics. 2006 Census Geographies: Census Collector District. Canberra,
- 2012.
42. Australian Bureau of Statistics. *Research Paper. Socio-Economic Indexes for Areas: Introduction,*
- Use and Future Directions*. Canberra: ABS, 2006.
43. Astell-Burt T, Feng X, Kolt GS. Neighbourhood green space is associated with more frequent
- walking and moderate to vigorous physical activity (MVPA) in middle-to-older aged adults.
- Findings from 203,883 Australians in The 45 and Up Study. *British Journal of Sports Medicine*
- 2013:In press.
44. Trewin D. Socio-Economic Indexes for Areas (SEIFA). *Canberra, Australia: Australian Bureau of*
- Statistics* 2001.



- 1  
2  
3 45. Australian Population and Migration Research Centre. ARIA (Accessibility/Remoteness Index of  
4 Australia): The University of Adelaide, 2012.  
5 46. Leyland AH, Goldstein H. *Multilevel modelling of health statistics*: Wiley, 2001.  
6 47. Exeter D, Flowerdew R, Boyle P. Policy implications of pockets of deprivation in Scotland. *GIS and  
7 Evidence-Based Policy Making* 2007:95.  
8 48. Flowerdew R, Manley DJ, Sabel CE. Neighbourhood effects on health: Does it matter where you  
9 draw the boundaries? *Social Science & Medicine* 2008.  
10  
11  
12  
13  
14  
15  
16  
17  
18  
19  
20  
21  
22  
23  
24  
25  
26  
27  
28  
29  
30  
31  
32  
33  
34  
35  
36  
37  
38  
39  
40  
41  
42  
43  
44  
45  
46  
47  
48  
49  
50  
51  
52  
53  
54  
55  
56  
57  
58  
59  
60

1  
2  
3 **Do social interactions explain ethnic differences in psychological distress and the protective effect**  
4 **of local ethnic density? Evidence from a cross-sectional study of 226,487 adults in middle-to-older**  
5 **age**  
6  
7

8  
9 **Xiaoqi Feng, PhD\*<sup>1</sup>**

10  
11 **Thomas Astell-Burt, PhD<sup>2,3</sup>**

12  
13 **Gregory S. Kolt, PhD<sup>2</sup>**  
14

15  
16  
17 \*Corresponding Author, Centre of Health Research, School of Medicine, University of Western  
18 Sydney, Locked Bag 1797, Penrith, NSW 2751, Australia. +61 2 4620 3951. X.Feng@uws.edu.au  
19

20 1 Centre of Health Research, School of Medicine, University of Western Sydney, Australia

21 2 School of Science and Health, University of Western Sydney, Australia

22 3 School of Geography and Geosciences, University of St Andrews, UK  
23

24  
25 **KEYWORDS**

26  
27 MENTAL HEALTH; ETHNICITY; MULTILEVEL MODELLING; PUBLIC HEALTH; SOCIAL EPIDEMIOLOGY  
28  
29

30  
31 **WORD COUNT: 3603**  
32

33  
34  
35  
36 "The Corresponding Author has the right to grant on behalf of all authors and does grant on behalf of all authors,  
37 an exclusive licence (or non-exclusive for government employees) on a worldwide basis to the BMJ Group and  
38 co-owners or contracting owning societies (where published by the BMJ Group on their behalf), and its Licensees  
39 to permit this article (if accepted) to be published in Journal of Epidemiology and Community Health and any  
40 other BMJ Group products and to exploit all subsidiary rights, as set out in our licence."  
41  
42  
43  
44  
45  
46  
47  
48  
49  
50  
51  
52  
53  
54  
55  
56  
57  
58  
59  
60

1  
2  
3 **Do social interactions explain ethnic differences in psychological distress and the protective effect**  
4 **of local ethnic density? Evidence from a cross-sectional study of 226,487 adults in middle-to-older**  
5 **age**  
6  
7  
8

9  
10 **ABSTRACT**

11 **Background:** A frequently proposed, but under-researched hypothesis is that ethnic density benefits  
12 mental health through increasing social interactions. We examined this hypothesis in 226,487 adults  
13 from 19 ethnic groups aged 45 years and older in Australia.  
14

15 **Methods:** Multilevel logit regression was used to measure association between ethnicity, social  
16 interactions, own-group ethnic density and scores of 22+ on the Kessler scale of psychological  
17 distress. Self-reported ancestry was used as a proxy for ethnicity. Measures of social interactions  
18 included the number of times in the last week were: *i)* spent with friends or family participants did  
19 not live with; *ii)* talked to someone on the telephone; *iii)* attended meetings of social groups; and *iv)*  
20 how many people could be relied upon outside their home, but within one hour of travel. Per cent  
21 own-group ethnic density was measured at the Census Collection District scale.  
22  
23  
24

25 **Results:** Psychological distress was reported by 11% of Australians born in Australia. The risk of  
26 experiencing psychological distress varied among ethnic minorities and by country of birth (e.g. 33%  
27 for the Lebanese born in Lebanon, compared to 4% for the Swiss born in Switzerland). These  
28 differences remained after full adjustment. Social interactions varied between ethnic groups and  
29 were associated with lower psychological distress and ethnic density. Ethnic density was associated  
30 with reduced psychological distress for some groups. This association, however, was explained by  
31 individual and neighbourhood characteristics and not by social interactions.  
32  
33  
34

35 **Conclusion:** Social interactions are important correlates of mental health, but do not fully explain  
36 ethnic differences in psychological distress, nor the protective effect of own-group density.  
37  
38  
39

40  
41 **WHAT IS ALREADY KNOWN ON THIS SUBJECT?**

42 Ethnic differences in mental health, and the reportedly protective influence of own group ethnic  
43 density, are largely unexplained in previous studies. Social interactions are widely hypothesised as a  
44 mechanism linking ethnic density with more favourable mental health, and may also explain ethnic  
45 differences more generally. However, few studies have empirically tested these hypotheses.  
46  
47  
48

49 **WHAT THIS STUDY ADDS?**

50 In a large cohort of Australian adults in middle-to-older age, ethnic differences in mental health were  
51 not explained by four measures of social interactions. Protective associations between ethnic  
52 density and mental health were largely explained by individual-level socioeconomic characteristics,  
53 not social interactions.  
54  
55  
56  
57  
58  
59  
60

1  
2  
3 **Do social interactions explain ethnic differences in psychological distress and the protective effect**  
4 **of local ethnic density? Evidence from a cross-sectional study of 226,487 adults in middle-to-older**  
5 **age**  
6  
7  
8

9  
10 **SUMMARY**

11 **Article Focus:**

- 12  
13
- 14 • Ethnic differences in mental health, and the reportedly protective influence of own group  
15 ethnic density, are largely unexplained in previous studies.
  - 16 • Social interactions are widely hypothesised as a mechanism linking ethnic density with more  
17 favourable mental health, and may also explain ethnic differences more generally. However,  
18 few studies have empirically tested these hypotheses.
  - 19 • We examined this hypothesis in 226,713 adults from 19 ethnic groups aged 45 years and  
20 older in Australia.  
21  
22  
23

24  
25 **Key Messages:**

- 26  
27
- 28 • Ethnic differences in mental health persisted after full adjustment; they were not explained  
29 by four measures of social interactions, or other individual and neighbourhood  
30 characteristics.
  - 31 • Protective associations between ethnic density and mental health were largely explained by  
32 individual-level socioeconomic characteristics, not social interactions.  
33  
34  
35

36 **Strengths and Limitations:**

- 37  
38
- 39 • Large samples allowed for stratification of ethnic groups to investigate differences in mental  
40 health, social interactions and ethnic density by country of birth
  - 41 • The use of a very small geographical scale than in previous work allowed for the  
42 ascertainment of local 'pockets' of ethnic density, which would otherwise have been hidden  
43 if the study had been dependent upon larger spatial units
  - 44 • Some of the remaining ethnic inequalities in mental health could be explained by systematic  
45 differences in the experience of racial discrimination which we were unable to control for  
46  
47  
48  
49  
50  
51  
52  
53  
54  
55  
56  
57  
58  
59  
60

## INTRODUCTION

The existence of ethnic differences in mental health have long been reported, though not fully explained<sup>1-3</sup>. It has been suggested that living in areas of higher own group ethnic density reduces the risk of psychological distress, with increased social support hypothesised to be one of the primary drivers<sup>4</sup>. Social norms and support networks that promote resilience to material disadvantage and sources of psychosocial stress (e.g. racism<sup>5</sup>) are thought to be encouraged and maintained by this geographical clustering of ethnic groups<sup>6</sup>; even in deprived communities<sup>7-9</sup>. However, there is very little empirical evidence on the extent that increased social support explains why some groups tend to report better mental health in ethnically dense neighbourhoods.

Only two studies have been identified that have examined this proposition, one in the UK and another in the US, with equivocal results<sup>10,11</sup>. More broadly, studies of ethnic density and mental health have been mostly based upon adolescents and adults of child-bearing age in European and North American datasets<sup>10-18</sup>. Few studies have been conducted on adults in middle to older age. **This is especially the case in Australia (with the exception of an earlier ecological study<sup>19</sup>)**, which is surprising when one considers that, of the 22.6 million population, over one quarter were born outside Australia<sup>20</sup> and 50% of whom originated from non-English-speaking countries<sup>21</sup>.

Australian cities are some of the most ethnically diverse in the world<sup>22</sup> and often contain substantial residential clustering of ethnic groups<sup>23-25</sup>. Contrasting migration histories and residential patterns of ethnic groups means that one cannot assume association between ethnic density and mental health reported in Europe and North America generalises to the Australian context. Therefore, more research is required not only to further understand the mechanisms underlying ethnic density effects, but also to identify the extent that ethnic density may be beneficial to mental health in other ethnically diverse countries like Australia. In this paper we attempt to achieve both of these aims, in addition to an examination of ethnic differences in mental health and the role of social support more generally, through an analysis of a large number of ethnic groups and four measures of social interactions in an Australian cohort of adults.

## METHOD

### Study population

The 45 and Up study<sup>26</sup> is a large scale cohort of 267,151 residents aged 45 and over in New South Wales ('NSW', the most populous state in Australia). A baseline questionnaire covering a range of health and social issues was distributed to a random sample of adults listed in the Medicare Australia database between 2006 and 2009 inclusive. Medicare Australia is the database through which national healthcare is provided for Australian citizens and permanent residents, as well some temporary residents and refugees<sup>26</sup>. Response to the questionnaire was 18%, which is low, though previous research has suggested that results from the 45 and Up Study are broadly comparable to those derived from 'representative' samples<sup>27</sup>. The University of New South Wales Human Research Ethics Committee approved The 45 and Up Study. Further details including the baseline questionnaire are available to download from [www.45andUp.org.au](http://www.45andUp.org.au).

1  
2  
3 Ethnicity status was derived from the first (of up to two) responses to a question on self-reported  
4 ancestry ('What is your ancestry?'). Secondary responses to this question were not used in the  
5 definition of ethnicity as they were not available in our dataset. We focused on the 19 largest  
6 groups: Australian, English, Scottish, Welsh, Irish, Danish, French, Swiss, German, Dutch, Spanish,  
7 Italian, Greek, Polish, Maltese, Lebanese, Croatian, Indian, and Chinese. Large sample sizes allowed  
8 for stratification of each group by country of birth (assessed by the question 'in which country were  
9 you born?') to address healthy-migrant effects. We retained all participants born in Australia  
10 (n=179,712), all participants of Australian ethnicity born outside Australia (n=1,336), and participants  
11 of non-Australian ethnic groups born in their ethnic-country of origin (n=33,739). Participants of  
12 non-Australian ethnic groups born elsewhere (i.e. not Australia or their ethnic-country of origin)  
13 were omitted from the sample (n=33,574) for substantive and practical reasons. Non-Australian  
14 ethnic groups born overseas and not in the ethnic-country of origin were heterogeneous by  
15 definition, which made it difficult to meaningfully interpret any results for to these participants.  
16 Furthermore, in practical terms, the sample sizes of many of these groups were small, which also  
17 reduced the potential to draw reliable statistical inference. We also omitted all participants missing  
18 a postcode identifier (n=263) and those missing a valid outcome measure (n=7,011). Missing data  
19 for independent variables was resolved via imputing the mean of the observed values, retaining an  
20 overall sample size of n=226,487.  
21  
22  
23  
24  
25  
26  
27

### 28 **Psychological distress**

29  
30 We used the Kessler Psychological Distress Scale (K10) to evaluate mental health status<sup>28 29</sup>. The K10  
31 measures symptoms of psychological distress experienced over the past four weeks, including  
32 feeling tired for no reason, nervous, hopeless, restless, depressed, sad and worthless. Participants  
33 had five choices for each of the ten questions (none of the time =1, a little of the time =2, some of  
34 the time =3, most of the time =4, all of the time=5) and these were summed to give the overall score.  
35 The K10 have been previously used to gauge levels of psychological distress across different  
36 countries and ethnic groups<sup>29-32</sup>. We constructed a binary variable wherein a score of 22 or more  
37 identified participants with a high risk of psychological distress<sup>33</sup>. The K10 has been used in this  
38 binary manner, with 22 as the cut-point, in previous published analyses of The 45 and Up Study<sup>34-36</sup>.  
39  
40  
41  
42  
43  
44

### 45 **Other individual-level measures**

46 Social interactions were measured using four questions from the shortened version of the Duke  
47 Social Support Index<sup>37</sup>. Three of the questions tested the number of times in the past week a  
48 participant: i) spent time with friends or family they did not live with; ii) talked to someone (friends,  
49 relatives or others) on the telephone; iii) attended meetings at social clubs or religious groups. The  
50 final question asked participants how many people outside their home, but within one hour travel-  
51 time, did they feel close to or could rely on. Previous work has constructed a composite indicator of  
52 social support from responses to these questions<sup>38 39</sup>, though we analysed each one separately in  
53 line with recent studies which have demonstrated that some are more important than others<sup>40</sup>.  
54  
55  
56  
57  
58  
59  
60

1  
2  
3 We also accounted for other individual-level variables (self-reported) which are known to correlate  
4 with mental health. These included: age, gender, physical activity, smoking status, Body Mass Index  
5 (BMI), highest educational qualifications, economic status, annual household income, couple status,  
6 and whether language(s) other than English were spoken at home.  
7  
8  
9

### 10 11 **Neighbourhood-level measures**

12 This study used Census Collection Districts (CCD) to define neighbourhoods. With a mean of 225  
13 residents<sup>41</sup>, CCDs were the smallest geographical scale for which 2006 Census data was made  
14 available<sup>42</sup>. However, 9% of participants in The 45 and Up Study were missing a valid CCD. In line  
15 with a previous study using the same data<sup>43</sup>, we assigned those missing a CCD with a pseudo-CCD  
16 according to the location of the population-weighted postcode centroid as nearly 100% had a  
17 postcode identifier. Therefore, 100% of the sample could be assigned neighbourhood measures and  
18 clustering within regression models could be operationalized at the CCD level.  
19  
20  
21

22 We constructed the measure of own-group ethnic density from 2006 Census data. The Census  
23 question on ancestry (a surrogate for ethnicity in our study) was very similar to that used in the 45  
24 and Up Study (“What is the person’s ancestry?”). The number of people within a CCD pertaining to  
25 each participant’s ethnic group was divided the total usual resident population. For example,  
26 Chinese participants (regardless of their country of birth) were assigned the percentage of the  
27 population in their CCD who self-identified as Chinese.  
28  
29

30 Other neighbourhood measures included local affluence and geographical remoteness. We used the  
31 Socio-Economic Index for Areas (SEIFA) ‘Index of Relative Socio-Economic Advantage/Disadvantage’  
32<sup>44</sup> to measure local affluence. This is a variable derived by the Australian Bureau of Statistics (ABS)  
33 using Census variables which relate to advantage and disadvantage, including household income and  
34 educational qualifications. This indicator was expressed in percentiles; higher percentiles indicate  
35 more affluent areas. Geographical remoteness was measured using the ‘Accessibility/Remoteness  
36 Index of Australia’ (ARIA)<sup>45</sup>. ARIA is a score ranging from 0 to 15, with scores of 2.4 and over used to  
37 distinguish between urban and inner regions (<2.4) and rural or remote (>=2.4).  
38  
39  
40  
41  
42

### 43 **Statistical analysis**

44 The study population was first assessed using descriptive statistics. Measures of ethnic density were  
45 mapped across NSW. To investigate ethnic differences in psychological distress, multilevel logistic  
46 regression was used to account for the clustering of participants within CCDs<sup>46</sup>. The sample was  
47 clustered within 11,621 CCDs (20 participants per CCD on average). CCDs accounted for 3.3% of the  
48 variation in psychological distress within a ‘null’ two-level multilevel model. A categorical variable  
49 identifying ethnic groups stratified by country of birth was fitted in this model, which was then  
50 adjusted for age and gender. We proceeded to test whether any ethnic differences in psychological  
51 distress remained significant after controlling for social interactions, other individual-level variables,  
52 local affluence and geographical remoteness. Multilevel logit regression was fitted to ethnic and  
53 country of birth-specific groups (i.e. stratified models) to investigate association between  
54 psychological distress and own-group ethnic density. To assess whether these associations could be  
55  
56  
57  
58  
59  
60

1  
2  
3 explained by social interactions, we first tested the extent of correlation between each measure and  
4 own-group ethnic density using negative-binomial regression (to account for the skewed distribution  
5 of the social interaction variables). Social interactions were then fitted into the logit models,  
6 followed by individual-level variables, local affluence and geographical remoteness. Interaction  
7 terms were fitted to test for potential synergistic effects between ethnic density and other  
8 neighbourhood variables. Statistically significant associations were identified using the log-  
9 likelihood ratio test ( $p < 0.05$ ). All analyses were conducted in STATA 12.  
10  
11  
12

## 13 14 15 RESULTS

16  
17 Figure 1 reports differences in the age- and gender-adjusted prevalence of psychological distress by  
18 ethnicity and country of birth. The rate of high psychological distress was 11% for Australians born in  
19 Australia. In comparison, this risk was far higher for some groups, for example, 33% for the Lebanese  
20 born in Lebanon, but much lower for others, such as the Swiss born in Switzerland at 4%. There was  
21 no consistent effect of migrant status on the risk of psychological distress. For example, the  
22 prevalence of psychological distress among Croatians born in Croatia was 14.3% higher than their  
23 Australian born Croatian peers. In contrast, no substantive difference in the prevalence of  
24 psychological distress was reported among the Chinese, whether born in Australia (12.8%) or China  
25 (12.9%), and the Danish born in Australia had twice the risk of their Danish born contemporaries (10%  
26 to 5% respectively).  
27  
28  
29  
30  
31  
32  
33

34 <Figure 1 here>  
35  
36  
37  
38  
39

40 Table 1 reports the percentage of each ethnic and country of birth group within the lowest quartile  
41 of the four social interactions measures. P-values for comparisons between ethnic and country of  
42 birth groups for each social interaction variable were calculated using logistic regression. Compared  
43 to their Australian-born peers, those born within their ethnic country of origin tended to be more  
44 prevalent in the lowest quartile of every measure of social interactions. For the variable denoting  
45 how many people a person felt they could rely on, within group differences were notably wide  
46 between the Australian-born and those born in the ethnic country of origin for the French (34.1%,  
47 52%), Polish (37.8%, 51%), Lebanese (26.2%, 45.7%) and Chinese (32.8%, 56.7%).  
48  
49  
50  
51  
52  
53  
54  
55  
56  
57  
58  
59  
60



**Table 1: Ethnic and country of birth differences in social interactions; percentage in the lowest quartile for each measure of social interactions**

| Ethnic group, country of birth | N (%)         | Social interactions                                  |                                       |                                          |                                 |
|--------------------------------|---------------|------------------------------------------------------|---------------------------------------|------------------------------------------|---------------------------------|
|                                |               | <i>Less likely to spend time with friends/family</i> | <i>Less likely to talk to someone</i> | <i>Less likely to go to social clubs</i> | <i>Few people can depend on</i> |
| Australia, Australia           | 61,848 (27.3) | 35.9 (35.51, 36.30)                                  | 26.1 (25.72, 26.45)                   | 42.1 (41.68, 42.51)                      | 30.5 (30.10, 30.88)             |
| Australian, Not Australia      | 1,383 (0.6)   | 37.9 (35.37, 40.54)                                  | 30.2 (27.85, 32.73)***                | 37.9 (35.37, 40.59)***                   | 36.7 (34.15, 39.28)***          |
| English, Australia             | 50,480 (22.3) | 35.6 (35.16, 36.03)                                  | 25.5 (25.06, 25.86)*                  | 41.3 (40.89, 41.80)*                     | 30.1 (29.64, 30.49)             |
| English, UK                    | 16,356 (7.2)  | 41.4 (40.66, 42.21)***                               | 28.5 (27.82, 29.24)***                | 43.9 (43.15, 44.73)***                   | 37.9 (37.17, 38.71)***          |
| Scottish, Australia            | 21,745 (9.6)  | 35.1 (34.47, 35.78)*                                 | 24.6 (24.06, 25.24)***                | 40.5 (39.86, 41.21)***                   | 29.2 (28.57, 29.81)***          |
| Scottish, UK                   | 3,759 (1.7)   | 37.8 (36.28, 39.43)*                                 | 27.8 (26.32, 29.23)*                  | 42.9 (41.28, 44.53)                      | 35.8 (34.26, 37.37)***          |
| Welsh, Australia               | 1,265 (0.6)   | 36.6 (33.99, 39.38)                                  | 25.0 (22.67, 27.51)                   | 40.3 (37.58, 43.11)                      | 30.0 (27.48, 32.58)             |
| Welsh, UK                      | 835 (0.4)     | 42.4 (39.06, 45.87)***                               | 28.9 (25.89, 32.12)                   | 44.6 (41.14, 48.05)                      | 38.0 (34.68, 41.35)***          |
| Irish, Australia               | 33,360 (14.7) | 35.0 (34.52, 35.58)**                                | 24.1 (23.58, 24.53)***                | 39.7 (39.20, 40.30)***                   | 30.4 (29.91, 30.94)             |
| Irish, Ireland                 | 1,048 (0.5)   | 40.9 (37.89, 43.92)***                               | 27.5 (24.90, 30.34)                   | 36.7 (33.71, 39.69)***                   | 36.3 (33.37, 39.25)***          |
| Danish, Australia              | 695 (0.3)     | 36.4 (32.84, 40.09)                                  | 24.7 (21.58, 28.11)                   | 37.7 (34.11, 41.46)*                     | 30.2 (26.88, 33.74)             |
| Danish, Denmark                | 178 (0.1)     | 49.0 (41.63, 56.43)***                               | 34.2 (27.55, 41.57)*                  | 55.3 (47.76, 62.56)***                   | 42.3 (35.15, 49.78)***          |
| French, Australia              | 1,195 (0.5)   | 37.9 (35.18, 40.77)                                  | 26.3 (23.78, 28.92)                   | 44.1 (41.20, 46.95)                      | 34.1 (31.46, 36.87)**           |
| French, France                 | 237 (0.1)     | 47.1 (40.76, 53.58)***                               | 29.9 (24.30, 36.10)                   | 53.4 (46.92, 59.85)***                   | 52.0 (45.51, 58.36)***          |
| Swiss, Australia               | 163 (0.1)     | 40.9 (33.48, 48.67)                                  | 23.5 (17.62, 30.70)                   | 49.7 (41.86, 57.48)                      | 34.5 (27.59, 42.20)             |
| Swiss, Switzerland             | 224 (0.1)     | 49.6 (43.01, 56.23)***                               | 35.8 (29.66, 42.36)***                | 51.1 (44.46, 57.77)***                   | 45.1 (38.62, 51.76)***          |
| German, Australia              | 9,894 (4.4)   | 36.1 (35.18, 37.11)                                  | 26.4 (25.49, 27.27)                   | 41.4 (40.41, 42.41)                      | 31.0 (30.12, 31.97)             |
| German, Germany                | 2,073 (0.9)   | 48.0 (45.82, 50.19)***                               | 35.4 (33.33, 37.54)***                | 50.6 (48.38, 52.79)***                   | 45.8 (43.63, 47.99)***          |
| Dutch, Australia               | 1,487 (0.7)   | 35.0 (32.61, 37.43)                                  | 27.8 (25.57, 30.11)                   | 41.6 (39.09, 44.15)                      | 31.2 (28.93, 33.65)             |
| Dutch, Netherlands             | 2,451 (1.1)   | 40.8 (38.88, 42.85)***                               | 30.7 (28.87, 32.57)***                | 42.4 (40.39, 44.43)                      | 37.7 (35.78, 39.68)***          |
| Spanish, Australia             | 316 (0.1)     | 40.8 (35.42, 46.36)                                  | 28.6 (23.72, 33.93)                   | 46.6 (41.05, 52.22)                      | 30.0 (25.15, 35.25)             |
| Spanish, Spain                 | 158 (0.1)     | 45.5 (37.82, 53.48)*                                 | 31.4 (24.55, 39.12)                   | 53.9 (45.89, 61.72)**                    | 47.3 (39.57, 55.25)***          |
| Italian, Australia             | 3,259 (1.4)   | 35.5 (33.88, 37.18)                                  | 25.8 (24.33, 27.34)                   | 41.2 (39.49, 42.93)                      | 32.0 (30.42, 33.66)             |
| Italian, Italy                 | 1,922 (0.9)   | 37.4 (35.21, 39.62)                                  | 29.5 (27.48, 31.58)***                | 48.1 (45.84, 50.43)***                   | 36.5 (34.36, 38.75)***          |
| Greek, Australia               | 1,072 (0.5)   | 34.1 (31.36, 37.03)                                  | 21.2 (18.92, 23.75)***                | 44.0 (40.98, 47.03)                      | 30.1 (27.44, 32.96)             |
| Greek, Greece                  | 696 (0.3)     | 38.6 (35.02, 42.39)                                  | 30.5 (27.14, 34.09)**                 | 45.8 (42.01, 49.61)                      | 44.4 (40.63, 48.14)***          |
| Polish, Australia              | 1,111 (0.5)   | 39.0 (36.14, 41.91)*                                 | 28.7 (26.05, 31.41)                   | 41.8 (38.86, 44.72)                      | 37.8 (34.94, 40.70)***          |
| Polish, Poland                 | 471 (0.2)     | 47.5 (42.98, 52.12)***                               | 38.7 (34.31, 43.27)***                | 46.4 (41.80, 51.06)                      | 51.0 (46.37, 55.52)***          |
| Maltese, Australia             | 675 (0.3)     | 35.0 (31.53, 38.66)                                  | 28.8 (25.49, 32.29)                   | 41.1 (37.47, 44.93)                      | 29.2 (25.94, 32.79)             |
| Maltese, Malta                 | 715 (0.3)     | 38.7 (35.19, 42.43)                                  | 30.1 (26.78, 33.57)*                  | 38.9 (35.29, 42.59)                      | 38.9 (35.31, 42.57)***          |
| Lebanese, Australia            | 461 (0.2)     | 34.0 (29.83, 38.49)                                  | 23.5 (19.81, 27.54)                   | 37.5 (33.16, 42.06)*                     | 26.2 (22.35, 30.39)*            |
| Lebanese, Lebanon              | 567 (0.3)     | 30.9 (27.24, 34.78)*                                 | 29.6 (25.99, 33.43)                   | 41.4 (37.34, 45.56)                      | 45.7 (41.56, 49.89)***          |
| Croatian, Australia            | 218 (0.1)     | 37.3 (31.12, 43.93)                                  | 22.9 (17.83, 28.92)                   | 44.9 (38.34, 51.74)                      | 34.3 (28.32, 40.93)             |
| Croatian, Croatia              | 349 (0.2)     | 43.4 (38.20, 48.74)**                                | 40.8 (35.63, 46.14)***                | 47.3 (42.00, 52.68)                      | 48.0 (42.75, 53.36)***          |
| Indian, Australia              | 213 (0.1)     | 39.0 (32.60, 45.72)                                  | 20.8 (15.90, 26.69)                   | 43.6 (36.97, 50.42)                      | 32.3 (26.38, 38.90)             |
| Indian, India                  | 668 (0.3)     | 47.7 (43.91, 51.61)***                               | 26.3 (23.12, 29.66)                   | 26.5 (23.29, 29.88)***                   | 39.4 (35.66, 43.18)***          |
| Chinese, Australia             | 690 (0.3)     | 39.3 (35.68, 43.03)                                  | 28.7 (25.41, 32.24)                   | 40.5 (36.80, 44.23)                      | 32.8 (29.36, 36.41)             |
| Chinese, China                 | 2,250 (1.0)   | 53.5 (51.40, 55.62)***                               | 40.5 (38.42, 42.57)***                | 42.5 (40.42, 44.59)                      | 56.7 (54.62, 58.82)***          |

\*\*\* p < 0.001; \*\* p < 0.01; \* p < 0.05 (from Australian, Australia)

Table 2 reports results from multilevel logit regression. Model 1 reports ethnic and country of birth differences in psychological distress, adjusted for age and gender (sensu Figure 1). We adjusted this model for each social interaction variable individually, and then simultaneously (Model 2). Higher quartiles of each social interaction variable were associated with a lower risk of psychological distress; especially that denoting the number of people that can be relied on (highest quartile odds ratio: 0.36, 95% confidence interval: 0.34, 0.38). Social interactions only fully explained the higher risk of psychological distress experienced by the Chinese born in China (as denoted by statistical

significance). However, there were other instances where odds ratios were attenuated, though remained significant, and this was often for people born outside Australia, such as the Lebanese born in Lebanon (OR=3.97 to 3.67) and the Croatians born in Croatia (OR=2.70 to 2.30). Adjusting for all other individual-level characteristics, neighbourhood affluence and geographical remoteness (Model 3) had a more substantive effect on the ethnic differences (OR=3.67 to 2.11 for the Lebanese born in Lebanon; OR=2.30 to 1.84 for the Croatians born in Croatia).

**Table 2: Ethnic and country of birth group differences in the risk of psychological distress, adjusted for social interactions variables and other individual and neighbourhood characteristics**

| Ethnicity, country of birth                      | Model 1                              | Model 2              | Model 3              |
|--------------------------------------------------|--------------------------------------|----------------------|----------------------|
|                                                  | Odds Ratio (95% Confidence Interval) |                      |                      |
| Australian, Australia                            | 1                                    | 1                    | 1                    |
| Australian, Not Australia                        | 1.83 (1.59, 2.10)***                 | 1.73 (1.50, 1.99)*** | 1.57 (1.36, 1.82)*** |
| English, Australia                               | 0.93 (0.90, 0.97)***                 | 0.94 (0.90, 0.98)*** | 0.96 (0.92, 1.00)*   |
| English, UK                                      | 0.83 (0.78, 0.88)***                 | 0.75 (0.71, 0.80)*** | 0.82 (0.77, 0.87)*** |
| Scottish, Australia                              | 0.89 (0.84, 0.93)***                 | 0.90 (0.86, 0.95)*** | 0.96 (0.91, 1.01)    |
| Scottish, UK                                     | 0.81 (0.72, 0.90)***                 | 0.76 (0.68, 0.85)*** | 0.82 (0.73, 0.92)*** |
| Welsh, Australia                                 | 1.10 (0.93, 1.31)                    | 1.12 (0.94, 1.33)    | 1.19 (1.00, 1.42)    |
| Welsh, UK                                        | 0.82 (0.65, 1.04)                    | 0.75 (0.60, 0.95)*   | 0.84 (0.66, 1.07)    |
| Irish, Australia                                 | 0.95 (0.91, 0.99)*                   | 0.96 (0.92, 1.01)    | 0.99 (0.95, 1.04)    |
| Irish, Ireland                                   | 0.93 (0.76, 1.13)                    | 0.87 (0.71, 1.06)    | 0.92 (0.75, 1.12)    |
| Danish, Australia                                | 0.90 (0.70, 1.15)                    | 0.91 (0.71, 1.17)    | 0.94 (0.73, 1.21)    |
| Danish, Denmark                                  | 0.43 (0.22, 0.84)*                   | 0.36 (0.18, 0.71)**  | 0.38 (0.19, 0.77)**  |
| French, Australia                                | 1.04 (0.87, 1.24)                    | 1.01 (0.84, 1.21)    | 0.99 (0.83, 1.19)    |
| French, France                                   | 1.08 (0.73, 1.60)                    | 0.87 (0.58, 1.29)    | 1.00 (0.67, 1.51)    |
| Swiss, Australia                                 | 1.01 (0.62, 1.65)                    | 1.00 (0.61, 1.63)    | 1.14 (0.69, 1.88)    |
| Swiss, Switzerland                               | 0.33 (0.17, 0.65)***                 | 0.27 (0.14, 0.53)*** | 0.33 (0.17, 0.65)*** |
| German, Australia                                | 1.12 (1.05, 1.19)***                 | 1.11 (1.04, 1.19)*** | 1.10 (1.02, 1.17)**  |
| German, Germany                                  | 0.98 (0.86, 1.13)                    | 0.82 (0.71, 0.94)**  | 0.87 (0.75, 1.00)*   |
| Dutch, Australia                                 | 1.03 (0.88, 1.22)                    | 1.02 (0.87, 1.20)    | 1.07 (0.90, 1.27)    |
| Dutch, Netherlands                               | 0.96 (0.85, 1.09)                    | 0.88 (0.78, 1.01)    | 0.91 (0.80, 1.04)    |
| Spanish, Australia                               | 1.08 (0.77, 1.52)                    | 1.08 (0.76, 1.52)    | 0.92 (0.64, 1.33)    |
| Spanish, Spain                                   | 1.35 (0.87, 2.11)                    | 1.14 (0.73, 1.79)    | 1.06 (0.67, 1.67)    |
| Italian, Australia                               | 1.05 (0.94, 1.18)                    | 1.04 (0.93, 1.17)    | 1.07 (0.96, 1.21)    |
| Italian, Italy                                   | 1.79 (1.59, 2.02)***                 | 1.68 (1.49, 1.89)*** | 1.46 (1.29, 1.65)**  |
| Greek, Australia                                 | 1.07 (0.88, 1.29)                    | 1.08 (0.89, 1.30)    | 1.11 (0.91, 1.35)    |
| Greek, Greece                                    | 2.04 (1.69, 2.46)***                 | 1.81 (1.50, 2.19)*** | 1.33 (1.10, 1.62)**  |
| Polish, Australia                                | 1.17 (0.98, 1.40)                    | 1.10 (0.92, 1.32)    | 1.15 (0.95, 1.39)    |
| Polish, Poland                                   | 1.89 (1.51, 2.37)***                 | 1.54 (1.22, 1.94)*** | 1.64 (1.30, 2.08)*** |
| Maltese, Australia                               | 1.26 (1.01, 1.57)*                   | 1.27 (1.01, 1.59)*   | 1.11 (0.88, 1.41)    |
| Maltese, Malta                                   | 1.71 (1.41, 2.09)***                 | 1.59 (1.30, 1.94)*** | 1.19 (0.97, 1.46)    |
| Lebanese, Australia                              | 1.13 (0.85, 1.50)                    | 1.22 (0.92, 1.62)    | 1.31 (0.98, 1.75)    |
| Lebanese, Lebanon                                | 3.97 (3.30, 4.76)***                 | 3.67 (3.04, 4.42)*** | 2.11 (1.73, 2.57)*** |
| Croatian, Australia                              | 0.97 (0.63, 1.49)                    | 0.94 (0.61, 1.46)    | 1.00 (0.64, 1.56)    |
| Croatian, Croatia                                | 2.70 (2.11, 3.46)***                 | 2.30 (1.78, 2.96)*** | 1.84 (1.42, 2.39)*** |
| Indian, Australia                                | 1.86 (1.31, 2.63)***                 | 1.88 (1.33, 2.68)*** | 1.64 (1.14, 2.35)**  |
| Indian, India                                    | 1.13 (0.89, 1.43)                    | 1.07 (0.84, 1.36)    | 1.43 (1.12, 1.83)**  |
| Chinese, Australia                               | 1.18 (0.94, 1.48)                    | 1.16 (0.92, 1.45)    | 1.18 (0.93, 1.50)    |
| Chinese, China                                   | 1.19 (1.05, 1.35)**                  | 0.90 (0.79, 1.02)    | 1.05 (0.92, 1.20)    |
| Number of occasions spent with friends or family |                                      |                      |                      |
| Quartile 1 (Low)                                 |                                      | 1                    | 1                    |
| Quartile 2 (Low to Moderate)                     |                                      | 0.77 (0.74, 0.81)*** | 0.78 (0.75, 0.82)*** |
| Quartile 3 (Moderate to High)                    |                                      | 0.80 (0.77, 0.83)*** | 0.78 (0.75, 0.81)*** |
| Quartile 4 (High)                                |                                      | 1.00 (0.97, 1.04)    | 0.89 (0.85, 0.92)*** |
| Number of telephone conversations                |                                      |                      |                      |
| Quartile 1 (Low)                                 |                                      | 1                    | 1                    |
| Quartile 2 (Low to Moderate)                     |                                      | 0.77 (0.74, 0.80)*** | 0.82 (0.79, 0.85)*** |
| Quartile 3 (Moderate to High)                    |                                      | 0.79 (0.76, 0.82)*** | 0.83 (0.80, 0.87)*** |
| Quartile 4 (High)                                |                                      | 0.78 (0.75, 0.81)*** | 0.85 (0.82, 0.88)*** |

| Number of visits to social clubs       |                      |                      |
|----------------------------------------|----------------------|----------------------|
| Quartile 1 (Low)                       | 1                    | 1                    |
| Quartile 2 (Low to Moderate)           | 0.75 (0.72, 0.78)*** | 0.86 (0.83, 0.90)*** |
| Quartile 3 (Moderate to High)          | 0.77 (0.74, 0.80)*** | 0.88 (0.84, 0.91)*** |
| Quartile 4 (High)                      | 0.95 (0.92, 0.98)**  | 1.01 (0.97, 1.04)    |
| Number of people that can be relied on |                      |                      |
| Quartile 1 (Low)                       | 1                    | 1                    |
| Quartile 2 (Low to Moderate)           | 0.58 (0.56, 0.61)*** | 0.66 (0.63, 0.68)*** |
| Quartile 3 (Moderate to High)          | 0.48 (0.47, 0.50)*** | 0.56 (0.54, 0.58)*** |
| Quartile 4 (High)                      | 0.36 (0.34, 0.38)*** | 0.44 (0.42, 0.46)*** |

\* p < 0.05; \*\* p < 0.01; \*\*\* p < 0.001

Model 1: Multilevel logit regression, adjusted for age and gender

Model 2: Model 1 + social interactions

Model 3: Model 2 + other individual-level variables, neighbourhood affluence and geographical remoteness

Figure 2 illustrates the ethnic and country of birth group differences in own-group ethnic density. Regardless of whether participants were born in Australia or the UK, those identifying as Australian (32.6%) or English (35.1%) ethnicities lived in the most ethnically dense neighbourhoods. Compared to the Australians and the English, the clustering of other ethnic groups in NSW was much lower. The highest mean ethnic density for non-Australian and non-English groups was for the Chinese born in China at 14.9%, whereas the lowest was for Australian born Swiss at 0.1%. There was evidence of heterogeneity of mean ethnic density within some groups. For example, Italians born in Australia had a mean of ethnic density of 4.9% but Italian-born Italians had 7.7%. Similar patterns were observed for Greeks, the Chinese and the Lebanese.

<Figure 2 here>

For the next stage of analysis we investigated the level of association with own-group ethnic density. This necessitated stratification of the sample by ethnic and country of birth group to match each individual with the relevant ethnic density measure. For example, Chinese ethnic density was matched to Chinese individuals (irrespective of whether they were born in China or Australia). We conducted these analyses for all groups, but due to space constraints, we focus our report on groups that have a mean ethnic density of 2% or more: Australians, English, Scottish, Irish, German, Italian, Greek, Lebanese, and Chinese. Table 3 reports mostly weak and positive or null (i.e.  $p > 0.05$ ) correlations between own group ethnic density and each of the social interactions variables. The most consistent set of correlations were for the social interactions variable which indicated how many people could be relied on within a one-hour travel-time.

**Table 3: Correlations between own group ethnic density and each of the social interactions variables, stratified by ethnic and country of birth group**

| Ethnic group, country of birth | How many times last week did you:                              |                                                       |                                                                                       | How many people outside your home, within one hour of travel, do you feel you can depend on |
|--------------------------------|----------------------------------------------------------------|-------------------------------------------------------|---------------------------------------------------------------------------------------|---------------------------------------------------------------------------------------------|
|                                | <i>Spend time with friends/family who do not live with you</i> | <i>Talk to someone (friends, relatives or others)</i> | <i>Go to meetings of social clubs, religious groups or other groups you belong to</i> |                                                                                             |
| Australia, Australia           | 0.012**                                                        | -0.017***                                             | -0.012**                                                                              | 0.008*                                                                                      |
| Australian, Not Australia      | -0.010                                                         | -0.053*                                               | 0.005                                                                                 | -0.001                                                                                      |
| English, Australia             | 0.019***                                                       | 0.001                                                 | 0.013**                                                                               | -0.001                                                                                      |
| English, UK                    | 0.0156                                                         | -0.010                                                | 0.029**                                                                               | 0.006                                                                                       |
| Scottish, Australia            | 0.007                                                          | 0.008                                                 | 0.001                                                                                 | 0.014*                                                                                      |
| Scottish, UK                   | 0.036*                                                         | 0.029                                                 | -0.007                                                                                | 0.031                                                                                       |
| Irish, Australia               | 0.005                                                          | 0.009                                                 | -0.001                                                                                | 0.005                                                                                       |
| Irish, Ireland                 | -0.014                                                         | -0.012                                                | 0.019                                                                                 | -0.027                                                                                      |
| German, Australia              | -0.002                                                         | -0.016                                                | 0.016                                                                                 | 0.024*                                                                                      |
| German, Germany                | -0.022                                                         | 0.020                                                 | -0.004                                                                                | 0.057**                                                                                     |
| Italian, Australia             | 0.018                                                          | -0.028                                                | -0.035*                                                                               | 0.049**                                                                                     |
| Italian, Italy                 | 0.028                                                          | 0.025                                                 | 0.045                                                                                 | 0.086**                                                                                     |
| Greek, Australia               | 0.066*                                                         | -0.032                                                | -0.028                                                                                | 0.117**                                                                                     |
| Greek, Greece                  | 0.012                                                          | -0.026                                                | 0.052                                                                                 | 0.017                                                                                       |
| Lebanese, Australia            | -0.033                                                         | 0.047                                                 | 0.055                                                                                 | 0.273***                                                                                    |
| Lebanese, Lebanon              | -0.029                                                         | 0.009                                                 | -0.061                                                                                | -0.031                                                                                      |
| Chinese, Australia             | 0.048                                                          | -0.015                                                | 0.008                                                                                 | -0.059                                                                                      |
| Chinese, China                 | 0.036                                                          | 0.033                                                 | 0.082**                                                                               | -0.007                                                                                      |

\* p < 0.05; \*\* p < 0.01; \*\*\* p < 0.001

Table 4 reports the results of these ethnic and county of birth group specific models. Model 1 fitted the association between psychological distress and own-group ethnic density, adjusted for age and gender. A 1% increase in own-group ethnic density appeared protective against psychological distress for the English born in UK, and Australian-born Scottish, Irish and Chinese. Unexpectedly, increasing ethnic density was associated with a higher risk of psychological distress among Australians born in Australia. This model was adjusted by the social interactions variables (Model 2), but the associations between ethnic density and psychological distress persisted. Further adjustment for other individual-level variables, local affluence and geographical remoteness (Model 3) had a more substantial attenuating influence on the ethnic density odds ratios and 95% confidence intervals, except that for the English born in the UK and the overseas-born Australians. We did not find any evidence of interactions between ethnic density and any other independent variables in our models. **Results from the imputed data set were similar to those from complete-case analysis.**

**Table 4: Association between own-group ethnic density and psychological distress by ethnic group, adjusting for social interactions and other individual and neighbourhood characteristics: Odds Ratios (95% Confidence Intervals)**

|  | Model 1 | Model 2 | Model 3 |
|--|---------|---------|---------|
|--|---------|---------|---------|

|                           | OR (95% CI)             |                         |                        |
|---------------------------|-------------------------|-------------------------|------------------------|
| Australian, Australia     | 1.011 (1.008, 1.014)*** | 1.010 (1.007, 1.014)*** | 1.000 (0.997, 1.004)   |
| Australian, not Australia | 0.974 (0.959, 0.988)*** | 0.976 (0.961, 0.991)**  | 0.973 (0.955, 0.991)** |
| English, Australia        | 1.000 (0.996, 1.003)    | 1.000 (0.996, 1.004)    | 0.998 (0.994, 1.002)   |
| English, UK               | 0.992 (0.986, 0.999)*   | 0.993 (0.987, 1.000)*   | 0.992 (0.985, 0.999)*  |
| Scottish, Australia       | 0.972 (0.945, 1.000)*   | 0.979 (0.951, 1.007)    | 0.986 (0.957, 1.015)   |
| Scottish, UK              | 0.982 (0.913, 1.057)    | 0.991 (0.921, 1.067)    | 1.002 (0.929, 1.081)   |
| Irish, Australia          | 0.977 (0.962, 0.992)**  | 0.980 (0.965, 0.995)**  | 0.998 (0.983, 1.014)   |
| Irish, Ireland            | 0.940 (0.861, 1.026)    | 0.946 (0.863, 1.038)    | 0.965 (0.868, 1.073)   |
| German, Australia         | 0.987 (0.949, 1.028)    | 0.994 (0.954, 1.036)    | 1.000 (0.959, 1.042)   |
| German, Germany           | 0.999 (0.901, 1.107)    | 1.004 (0.905, 1.115)    | 1.002 (0.895, 1.121)   |
| Italian, Australia        | 0.991 (0.973, 1.009)    | 0.994 (0.977, 1.012)    | 1.013 (0.992, 1.034)   |
| Italian, Italy            | 0.998 (0.985, 1.011)    | 1.002 (0.989, 1.016)    | 1.003 (0.988, 1.017)   |
| Greek, Australia          | 0.983 (0.943, 1.024)    | 0.994 (0.955, 1.035)    | 1.006 (0.963, 1.052)   |
| Greek, Greece             | 1.009 (0.987, 1.032)    | 1.011 (0.989, 1.034)    | 1.005 (0.979, 1.032)   |
| Lebanese, Australia       | 1.008 (0.954, 1.065)    | 1.038 (0.981, 1.099)    | 0.983 (0.913, 1.057)   |
| Lebanese, Lebanon         | 1.025 (0.999, 1.051)    | 1.023 (0.995, 1.051)    | 1.012 (0.983, 1.042)   |
| Chinese, Australia        | 0.897 (0.812, 0.990)*   | 0.861 (0.760, 0.975)*   | 0.884 (0.699, 1.116)   |
| Chinese, China            | 1.003 (0.992, 1.014)    | 1.004 (0.993, 1.014)    | 0.999 (0.988, 1.011)   |

\* p < 0.05; \*\* p < 0.01; \*\*\* p < 0.001

Model 1: Adjusted for age and gender

Model 2: Model 1 + social interactions

Model 3: Model 2 + individual characteristics, neighbourhood affluence and geographical remoteness

## DISCUSSION

This paper examined the relationship between ethnic density and psychological distress in one of the most ethnic diverse areas of Australia. We found substantive heterogeneity in the risk of psychological distress between and within ethnic groups. Ethnic differences in social interactions, individual and neighbourhood characteristics did not explain the ethnic differences in the risk of psychological distress. More social interactions were associated with a lower risk of psychological distress, especially the number of people study participants felt they could rely on. Increasing own-group ethnic density was associated more social interactions and less psychological distress for some ethnic groups, but not all. However, it was the characteristics of individuals and the neighbourhoods in which they lived, not the social interactions, which mostly explained the ethnic density effects on psychological distress. Only the English born in the UK and the overseas-born Australians appeared to benefit from ethnic density after controlling for all other characteristics.

Although there are many studies on ethnic density and mental health<sup>4 6 10-18</sup>, only two others have tested whether this relationship is explained by social interactions. A UK study<sup>10</sup> found a lower risk of common mental disorders for the Irish and for the Bangladeshi groups they studied in more

1  
2  
3 ethnically dense neighbourhoods. This was not fully explained by measures of practical and  
4 emotional social support. Contrary to the ethnic density hypothesis, this study also reported  
5 significantly higher risk of common mental disorders among white British in ethnically dense  
6 neighbourhoods. A study in the US<sup>11</sup> also showed the benefits of living in a higher own-ethnic group  
7 density neighbourhoods for the emotional well-being of Black and Hispanic groups. Measures of  
8 personal and neighbourhood social support partially explained the relationship for Blacks but not  
9 among Hispanics. Therefore, despite using contrasting measures of mental health and social  
10 interactions for different ethnic groups in the UK, US and Australia, our findings are consistent  
11 wherein social interactions only played a weak role in explaining the ethnic density effect on mental  
12 health.  
13  
14  
15

16 A particular strength of our study includes the large sample sizes for many different ethnic groups;  
17 more than has been possible to analyse in previous studies<sup>4</sup>. This allowed stratification by country  
18 of birth, which afforded new insights into the heterogeneity of mental health, social interactions and  
19 ethnic density within groups. It is noteworthy that levels of ethnic density varied considerably by  
20 country of birth within some ethnic groups (e.g. the Chinese), though not all (e.g. the English). Given  
21 the general supposition that higher levels of ethnic density are better for mental health, it could be  
22 argued that for many groups, levels of ethnic density do not achieve a sufficient concentration  
23 necessary for health promotion in this sample. This hypothesis is not convincing, however, when  
24 one considers that no association between ethnic density and psychological distress was found for  
25 the Chinese born in China, who reported a mean ethnic density of approximately 15% and a  
26 maximum of nearly 80%, but there was an association among the Chinese born in Australia, for  
27 whom the mean ethnic density was about 5% and a maximum of around 63%. Likewise, there  
28 appeared to be a benefit of ethnic density for the UK-born English, but not the English born in  
29 Australia, despite having very similar levels of own-group ethnic density. As such, it would appear  
30 that a more nuanced approach may be required in future, using other sources of administrative data  
31 and qualitative methods to examine what it is about ethnically dense neighbourhoods which  
32 promote better mental health in some ethnic groups, but not all.  
33  
34  
35  
36  
37

38 Our measures of psychological distress and social interactions have been widely validated. The small  
39 geographical scale (CCD) used to construct ethnic density provided a more accurate description of  
40 local circumstances than previous work which has relied upon larger spatial scales, helping to  
41 identify small 'pockets' of ethnic density and affluence that would otherwise have been hidden<sup>47</sup>.  
42 The focus on small scale geography is an advantage, though our study shares a common limitation  
43 among others of this genre in the reliance upon administrative boundaries, which are unlikely to  
44 perfectly correlate with residents' perceptions of neighbourhood<sup>48</sup>. **Such perceptions may vary  
45 depending upon location, circumstances and individual characteristics; including ethnicity.  
46 Therefore, it would appear that future research may need to explore the ethnic density hypothesis  
47 with customised measures of neighbourhood scale.**  
48  
49  
50

51 It is reasonable to expect that social support from the neighbourhood would be reflected in the four  
52 measures of social interactions used in the study, albeit imperfectly. Social clubs attended, for  
53 example, may be located in the neighbourhood and many of the people who can be relied on within  
54 one hour of travel may in fact live much closer. The limitation, however, is that the questions used  
55 in the 45 and Up Study did not ask participants to distinguish how many of these interactions  
56 occurred within versus outside the neighbourhood in which they lived. It would be useful for further  
57  
58  
59  
60

1  
2  
3 work, therefore, to examine indicators which specify neighbourhood parameters within the question.  
4 Another limitation was that the 45 and Up Study was sampled from the Medicare Australia database  
5 which mainly includes Australian citizens and migrants on permanent residency visas. Only some  
6 migrants on temporary visas are included on this scheme and this is likely to mean that some ethnic  
7 minorities were not represented in our study. Representativeness is also a concern for a dataset  
8 wherein the response rate was only 18%, although comparisons between the 45 and Up Study and a  
9 'representative' dataset have helped to alleviate these concerns to some extent <sup>27</sup>. **However, the  
10 comparisons in the aforementioned study did find heterogeneity between psychological distress  
11 and English spoken at home, and did not have an explicit focus on ethnic differences. Although  
12 regression methods are robust to missing data assumptions, there is still the possibility of bias.**  
13 The 45 and Up Study asked participants about Aboriginal and Torres Strait Islander origin, though  
14 responses to this variable were not available for this investigation and are the focus of a follow-up  
15 study. Many studies have suggested that spatial variation in the experiences of racism could help to  
16 explain the ethnic density effect <sup>14 16</sup>. Although we had no measure of racism in our study, virtually  
17 all benefits of ethnic density were already explained by other individual characteristics. Finally, our  
18 study represents only people 45 years and older, so it cannot discount the possibility of different  
19 patterns for younger age groups.  
20  
21  
22  
23  
24  
25  
26  
27  
28  
29  
30  
31  
32  
33  
34  
35  
36  
37  
38  
39  
40  
41  
42  
43  
44  
45  
46  
47  
48  
49  
50  
51  
52  
53  
54  
55  
56  
57  
58  
59  
60

## CONCLUSION

Ethnic groups in New South Wales, Australia, experience substantively different risks of psychological distress. These differences also align by country of birth, though there is no consistent pattern. Increasing social interactions, particularly those which help people to develop relationships with others they can depend on in times of need, are beneficial for mental health regardless of ethnicity and country of birth. In comparison, the ethnic density of where people live was protective only for the UK-born English and the overseas-born Australians.

## ACKNOWLEDGEMENTS, COMPETING INTERESTS & FUNDING

We thank all of the men and women who participated in the 45 and Up Study. The 45 and Up Study is managed by the Sax Institute in collaboration with major partner Cancer Council New South Wales; and partners the Heart Foundation (NSW Division); NSW Ministry of Health; *beyondblue: the national depression initiative*; Ageing, Disability and Home Care, NSW Family and Community Services; and the Australian Red Cross Blood Service. We acknowledge the use of 2006 census and boundary data provided by the Australian Bureau of Statistics. To preserve the anonymity of participants in The 45 and Up Study, some parameters of the Census Collector District (CCD) level data cannot be reported. This location-indexing data from the 45 and up Study is highly restricted access and will be made available only through SURE (<https://www.sure.org.au/>).

The authors have no competing interests.

No funding was sought for this study.

## LIST OF FIGURES

**Figure 1: Ethnic and country of birth differences in the rate of psychological distress (Kessler scores of 22 and over), adjusted for age and gender**

**Figure 2: Ethnic and country of birth differences in mean own-group ethnic density (percentage) at the Census Collection District (CCD) scale, with minimum and maximum: sorted highest to lowest**



## REFERENCES

1. Vega W, Rumbaut R. Ethnic minorities and mental health. *Annual Review of Sociology* 1991;17:351-83.
2. Nazroo JY. Ethnicity and Mental Health: Findings from a National Community Survey. London: Policy Studies Institute, 1997.
3. Sproston K, Nazroo J. *Ethnic Minority Psychiatric Illness Rates in the Community (EMPIRIC)*. London: TSO, 2002.
4. Shaw RJ, Atkin K, Bécares L, Albor CB, Stafford M, Kiernan KE, et al. Impact of ethnic density on adult mental disorders: narrative review. *The British Journal of Psychiatry* 2012;201(1):11-19.
5. Paradies Y. A systematic review of empirical research on self-reported racism and health. *International Journal of Epidemiology* 2006;35:888-901.
6. Pickett K, Wilkinson R. People like us: ethnic group density effects on health. *Ethnicity and Health* 2008;13(4):321-34.
7. Letki N. Does diversity erode social cohesion? Social capital and race in British neighbourhoods. *Political Studies* 2008;56(1):99-126.
8. Twigg L, Taylor J, Mohan J. Diversity or disadvantage? Putnam, Goodhart, ethnic heterogeneity, and collective efficacy. *Environment and Planning A* 2010;42(6):1421-38.
9. Bécares L, Stafford M, Laurence J, Nazroo J. Composition, Concentration and Deprivation Exploring their Association with Social Cohesion among Different Ethnic Groups in the UK. *Urban Studies* 2011;48(13):2771-87.
10. Das-Munshi J, Becares L, Dewey ME, Stansfeld SA, Prince MJ. Understanding the effect of ethnic density on mental health: multi-level investigation of survey data from England. *BMJ: British Medical Journal* 2010;341.
11. Yuan ASV. Racial composition of neighborhood and emotional well-being. *Sociological Spectrum* 2007;28(1):105-29.
12. Pickett KE, Shaw RJ, Atkin K, Kiernan KE, Wilkinson RG. Ethnic density effects on maternal and infant health in the Millennium Cohort Study. *Social Science & Medicine* 2009;69(10):1476-83.
13. Becares L, Nazroo J, Jackson J, Heuvelman H. Ethnic density effects on health and experienced racism among Caribbean people in the US and England: A cross-national comparison. *Social Science & Medicine* 2012.
14. Becares L, Nazroo J, Stafford M. The buffering effects of ethnic density on experienced racism and health. *Health & Place* 2009;15(3):670-8.
15. Stafford M, Becares L, Nazroo J. Objective and Perceived Ethnic Density and Health: Findings From a United Kingdom General Population Survey. *American Journal of Epidemiology* 2009;170(4):484-93.
16. Astell-Burt T, Maynard MJ, Lenguerrand E, Harding S. Racism, ethnic density and psychological well-being through adolescence: evidence from the Determinants of Adolescent Social well-being and Health longitudinal study. *Ethnicity and Health* 2012;17:71-87.
17. Gieling M, Vollebergh W, van Dorsselaer S. Ethnic density in school classes and adolescent mental health. *Soc Psychiatry Psychiatr Epidemiol* 2009.
18. Xue Y, Leventhal T, Brooks-Gunn J, Earls F. Neighborhood residence and mental health problems of 5-to 11-year-olds. *Archives of General Psychiatry* 2005;62(5):554.
19. Krupinski J. *Psychological maladaptations in ethnic concentrations in Victoria*: Australian National Association for Mental Health, 1975.
20. Australian Bureau of Statistics. *A Picture of the Nation: The Statistician's Report on the 2006 Census*. Canberra: Australian Government, 2006.
21. Anikeeva O, Bi P, Hiller JE, Ryan P, Roder D, Han GS. The Health Status of Migrants in Australia: A Review. *Asia-Pacific Journal of Public Health* 2010;22(2):159-93.
22. Thorburn A. Prevalence of obesity in Australia. *Obesity reviews* 2005;6(3):187-89.

23. Johnston R, Forrest J, Poulsen M. Sydney's ethnic geography: new approaches to analysing patterns of residential concentration. *Australian Geographer* 2001;32(2):149-62.
24. Poulsen M, Johnston R, Forrest J. Is Sydney a divided city ethnically? *Australian geographical studies* 2004;42(3):356-77.
25. Dunn KM. Rethinking ethnic concentration: the case of Cabramatta, Sydney. *Urban Studies* 1998;35(3):503-27.
26. Banks E, Redman S, Jorm L, Armstrong B, Bauman A, Beard J, et al. Cohort profile: the 45 and up study. *International Journal of Epidemiology* 2008;37(5):941.
27. Mealing NM, Banks E, Jorm LR, Steel DG, Clements MS, Rogers KD. Investigation of relative risk estimates from studies of the same population with contrasting response rates and designs. *BMC medical research methodology* 2010;10(1):26.
28. Kessler RC, Andrews G, Colpe LJ, Hiripi E, Mroczek DK, Normand SL, et al. Short screening scales to monitor population prevalences and trends in non-specific psychological distress. *Psychological Medicine* 2002;32:959-76.
29. Furukawa TA, Kessler RC, Slade T, Andrews G. The performance of the K6 and K10 screening scales for psychological distress in the Australian National Survey of Mental Health and Well-Being. *Psychological Medicine* 2003;33(2):357-62.
30. Breslau J, Aguilar-Gaxiola S, Kendler KS, Su M, Williams D, Kessler RC. Specifying race-ethnic differences in risk for psychiatric disorder in a USA national sample. *Psychological Medicine* 2006;36(1):57-68.
31. Carrà G, Sciarini P, Segagni-Lusignani G, Clerici M, Montomoli C, Kessler R. Do they actually work across borders? Evaluation of two measures of psychological distress as screening instruments in a non Anglo-Saxon country. *European Psychiatry* 2011;26(2):122-27.
32. Furukawa TA, Kawakami N, Saitoh M, Ono Y, Nakane Y, Nakamura Y, et al. The performance of the Japanese version of the K6 and K10 in the World Mental Health Survey Japan. *International journal of methods in psychiatric research* 2008;17(3):152-58.
33. Australian Bureau of Statistics. *Information paper: use of the Kessler Psychological Distress Scale in ABS Health Surveys, Australia*. Canberra: Australian Bureau of Statistics, 2003.
34. Banks E, Byles JE, Gibson RE, Rodgers B, Latz IK, Robinson IA, et al. Is psychological distress in people living with cancer related to the fact of diagnosis, current treatment or level of disability? Findings from a large Australian study. *Medical Journal of Australia* 2010;193(5):92.
35. Byles JE, Gallienne L, Blyth FM, Banks E. Relationship of age and gender to the prevalence and correlates of psychological distress in later life. *International Psychogeriatrics* 2012;1(1):1-10.
36. George ES, Jorm L, Kolt GS, Bambrick HJ, Lujic S. Physical Activity and Psychological Distress in Older Men: Findings From the New South Wales 45 and Up Study. *Journal of Aging and Physical Activity* 2012;20:300-16.
37. Koenig HG, Westlund RE, George LK, Hughes DC, Blazer DG, Hybels C. Abbreviating the Duke Social Support Index for use in chronically ill elderly individuals. *Psychosomatics* 1993;34:61-69.
38. Howe C, Matthews LR, Heard R. Work to retirement: a snapshot of psychological health in a multicultural Australian population. *Work* 2010;36:119-27.
39. Pachana NA, Smith N, Watson M, McLaughlin D, Dobson A. Responsiveness of the Duke Social Support sub-scales in older women. *Age & Ageing* 2008;37:666-72.
40. Chiew M, Weber M, Egger S, Sitas F. A cross-sectional exploration of smoking status and social interaction in a large population-based Australian cohort. *Social Science & Medicine* 2012;75(1):77-86.
41. Australian Bureau of Statistics. 2006 Census Geographies: Census Collector District. Canberra, 2012.
42. Australian Bureau of Statistics. *Research Paper. Socio-Economic Indexes for Areas: Introduction, Use and Future Directions*. Canberra: ABS, 2006.

- 1  
2  
3 43. Astell-Burt T, Feng X, Kolt GS. Neighbourhood green space is associated with more frequent  
4 walking and moderate to vigorous physical activity (MVPA) in middle-to-older aged adults.  
5 Findings from 203,883 Australians in The 45 and Up Study. *British Journal of Sports Medicine*  
6 2013;In press.  
7  
8 44. Trewin D. Socio-Economic Indexes for Areas (SEIFA). *Canberra, Australia: Australian Bureau of*  
9 *Statistics* 2001.  
10 45. Australian Population and Migration Research Centre. ARIA (Accessibility/Remoteness Index of  
11 Australia): The University of Adelaide, 2012.  
12 46. Leyland AH, Goldstein H. *Multilevel modelling of health statistics*: Wiley, 2001.  
13 47. Exeter D, Flowerdew R, Boyle P. Policy implications of pockets of deprivation in Scotland. *GIS and*  
14 *Evidence-Based Policy Making* 2007:95.  
15 48. Flowerdew R, Manley DJ, Sabel CE. Neighbourhood effects on health: Does it matter where you  
16 draw the boundaries? *Social Science & Medicine* 2008.  
17  
18  
19  
20  
21  
22  
23  
24  
25  
26  
27  
28  
29  
30  
31  
32  
33  
34  
35  
36  
37  
38  
39  
40  
41  
42  
43  
44  
45  
46  
47  
48  
49  
50  
51  
52  
53  
54  
55  
56  
57  
58  
59  
60

1  
2  
3  
4  
5  
6  
7  
8  
9  
10  
11  
12  
13  
14  
15  
16  
17  
18  
19  
20  
21  
22  
23  
24  
25  
26  
27  
28  
29  
30  
31  
32  
33  
34  
35  
36  
37  
38  
39  
40  
41  
42  
43  
44  
45  
46  
47  
48  
49  
50  
51  
52  
53  
54  
55  
56  
57  
58  
59  
60

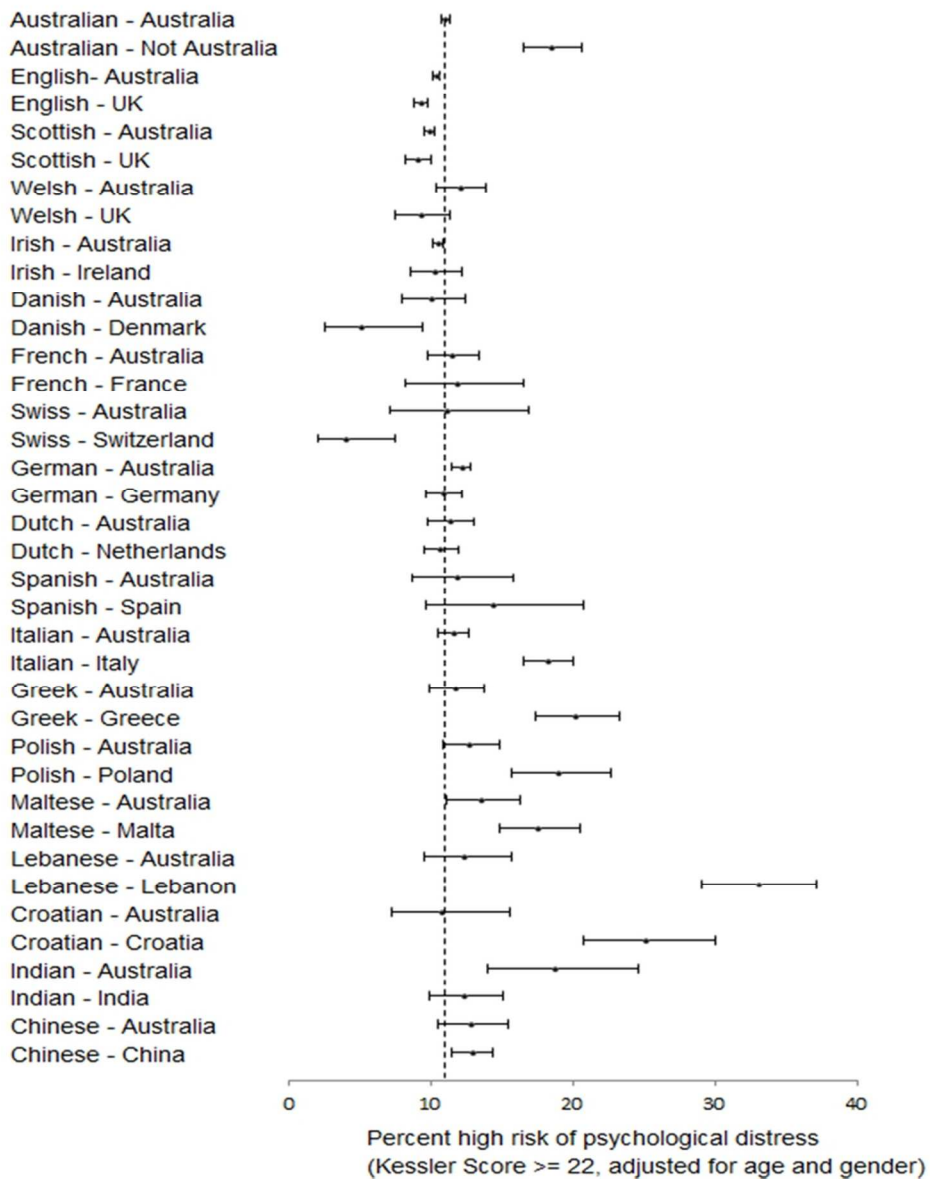

Ethnic and country of birth differences in the rate of psychological distress (Kessler scores of 22 and over), adjusted for age and gender  
90x106mm (300 x 300 DPI)

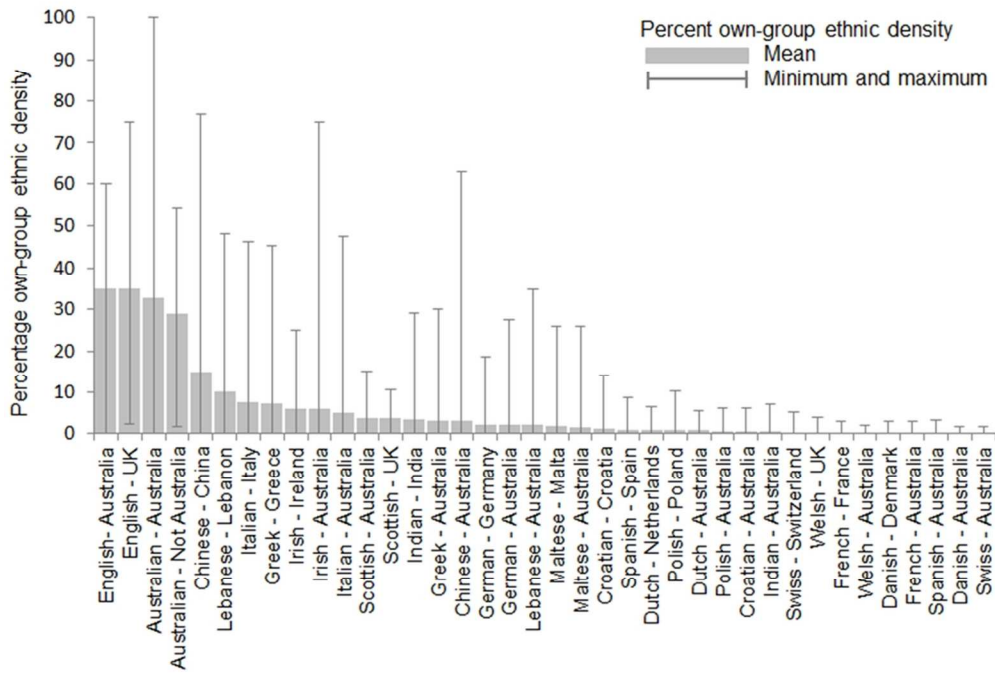

Ethnic and country of birth differences in mean own-group ethnic density (percentage) at the Census Collection District (CCD) scale, with minimum and maximum: sorted highest to lowest  
 127x90mm (300 x 300 DPI)

Review only

STROBE Statement—Checklist of items that should be included in reports of *cross-sectional studies*

|                           | Item No | Recommendation                                                                                                                  | Author comment and page number                                                                                                  |
|---------------------------|---------|---------------------------------------------------------------------------------------------------------------------------------|---------------------------------------------------------------------------------------------------------------------------------|
| <b>Title and abstract</b> | 1       | (a) Indicate the study's design with a commonly used term in the title or the abstract                                          | We have indicated in the title that this is a cross-sectional study. (see page 1)                                               |
|                           |         | (b) Provide in the abstract an informative and balanced summary of what was done and what was found                             | We have provided a structured abstract in line with JECH recommendations. (see page 1)                                          |
| <b>Introduction</b>       |         |                                                                                                                                 |                                                                                                                                 |
| Background/rationale      | 2       | Explain the scientific background and rationale for the investigation being reported                                            | We have explained the scientific background and rationale for the study in a two-paragraph introduction. (see page2)            |
| Objectives                | 3       | State specific objectives, including any prespecified hypotheses                                                                | We outline the objective of the study in the second paragraph of the introduction, see page2.                                   |
| <b>Methods</b>            |         |                                                                                                                                 |                                                                                                                                 |
| Study design              | 4       | Present key elements of study design early in the paper                                                                         | The study design is outlined in the first paragraph of the methods section, see page 2.                                         |
| Setting                   | 5       | Describe the setting, locations, and relevant dates, including periods of recruitment, exposure, follow-up, and data collection | The setting is outlined in the second paragraph of the introduction and the first paragraph of the methods section, see page 2. |
| Participants              | 6       | (a) Give the eligibility criteria, and the sources and methods of selection of participants                                     | Eligibility criteria and the selection of participant is discussed in paragraph 1 and 2                                         |

|                              |    |                                                                                                                                                                                      |                                                                                                                                                                                                                                                                                                          |
|------------------------------|----|--------------------------------------------------------------------------------------------------------------------------------------------------------------------------------------|----------------------------------------------------------------------------------------------------------------------------------------------------------------------------------------------------------------------------------------------------------------------------------------------------------|
|                              |    |                                                                                                                                                                                      | of the method section, see page 2 and 3                                                                                                                                                                                                                                                                  |
| Variables                    | 7  | Clearly define all outcomes, exposures, predictors, potential confounders, and effect modifiers. Give diagnostic criteria, if applicable                                             | All variables are discussed in paragraphs 2-8 of the method section, see page 2-4                                                                                                                                                                                                                        |
| Data sources/<br>measurement | 8* | For each variable of interest, give sources of data and details of methods of assessment (measurement). Describe comparability of assessment methods if there is more than one group | The primary source of data is the 45 and Up Study and this outlined in the first paragraph of the method section, see page 2. Details of measurement are provided separately for the outcome variable (psychological distress), other individual variables and neighbourhood level measures, see page 3. |
| Bias                         | 9  | Describe any efforts to address potential sources of bias                                                                                                                            | Sources of bias were discussed in the paragraph headed 'statistical analysis', see page 4. This focuses on adjustment for confounders and for the hierarchical data structure through the use of multilevel models.                                                                                      |
| Study size                   | 10 | Explain how the study size was arrived at                                                                                                                                            | Study size has been explained in paragraph 1 and 2 of the method section, see page 2 & 3                                                                                                                                                                                                                 |
| Quantitative variables       | 11 | Explain how quantitative variables were handled in the analyses. If applicable, describe which groupings were chosen and why                                                         | All variables have been outlined in the method section, see page 3 & 4 for details.                                                                                                                                                                                                                      |
| Statistical methods          | 12 | (a) Describe all statistical methods, including those used to                                                                                                                        | All methods have                                                                                                                                                                                                                                                                                         |

|                   |     |                                                                                                                                                                                                              |                                                                                                                                                                                                                           |
|-------------------|-----|--------------------------------------------------------------------------------------------------------------------------------------------------------------------------------------------------------------|---------------------------------------------------------------------------------------------------------------------------------------------------------------------------------------------------------------------------|
|                   |     | control for confounding                                                                                                                                                                                      | been described in                                                                                                                                                                                                         |
|                   |     | (b) Describe any methods used to examine subgroups and interactions                                                                                                                                          | the section headed ‘statistical                                                                                                                                                                                           |
|                   |     | (c) Explain how missing data were addressed                                                                                                                                                                  | analysis’, see page                                                                                                                                                                                                       |
|                   |     | (d) If applicable, describe analytical methods taking account of sampling strategy                                                                                                                           | 4. Explanation on how missing data                                                                                                                                                                                        |
|                   |     | (e) Describe any sensitivity analyses                                                                                                                                                                        | were addressed in paragraph 2 of the method section, see page 3.                                                                                                                                                          |
| <b>Results</b>    |     |                                                                                                                                                                                                              |                                                                                                                                                                                                                           |
| Participants      | 13* | (a) Report numbers of individuals at each stage of study—eg numbers potentially eligible, examined for eligibility, confirmed eligible, included in the study, completing follow-up, and analysed            | Sample selection was described in paragraph 2 of the method section, see page 2 & 3.                                                                                                                                      |
|                   |     | (b) Give reasons for non-participation at each stage                                                                                                                                                         |                                                                                                                                                                                                                           |
|                   |     | (c) Consider use of a flow diagram                                                                                                                                                                           |                                                                                                                                                                                                                           |
| Descriptive data  | 14* | (a) Give characteristics of study participants (eg demographic, clinical, social) and information on exposures and potential confounders                                                                     | Characteristics of the study participants including sample sizes and prevalence of key outcome and explanatory variables are reported in paragraph 1-4 of the result section, see page 4 & 5, figure 1&2 and table 1 & 2. |
|                   |     | (b) Indicate number of participants with missing data for each variable of interest                                                                                                                          |                                                                                                                                                                                                                           |
| Outcome data      | 15* | Report numbers of outcome events or summary measures                                                                                                                                                         |                                                                                                                                                                                                                           |
| Main results      | 16  | (a) Give unadjusted estimates and, if applicable, confounder-adjusted estimates and their precision (eg, 95% confidence interval). Make clear which confounders were adjusted for and why they were included |                                                                                                                                                                                                                           |
|                   |     | (b) Report category boundaries when continuous variables were categorized                                                                                                                                    |                                                                                                                                                                                                                           |
|                   |     | (c) If relevant, consider translating estimates of relative risk into absolute risk for a meaningful time period                                                                                             |                                                                                                                                                                                                                           |
| Other analyses    | 17  | Report other analyses done—eg analyses of subgroups and interactions, and sensitivity analyses                                                                                                               | Sub-group analysis is reported in paragraph 5 & 6 in the result section, see page 5 and table 3.                                                                                                                          |
| <b>Discussion</b> |     |                                                                                                                                                                                                              |                                                                                                                                                                                                                           |
| Key results       | 18  | Summarise key results with reference to study objectives                                                                                                                                                     | Key results are outlined briefly in paragraph 1 of the discussion section on page 6.                                                                                                                                      |
| Limitations       | 19  | Discuss limitations of the study, taking into account sources of potential bias or imprecision. Discuss both direction and                                                                                   | Strengths and limitations of the                                                                                                                                                                                          |



|                          |    |                                                                                                                                                                            |                                                                                                                                        |
|--------------------------|----|----------------------------------------------------------------------------------------------------------------------------------------------------------------------------|----------------------------------------------------------------------------------------------------------------------------------------|
|                          |    | magnitude of any potential bias                                                                                                                                            | study are discussed in paragraph 3 of the discussion section, see page 6 &7.                                                           |
| Interpretation           | 20 | Give a cautious overall interpretation of results considering objectives, limitations, multiplicity of analyses, results from similar studies, and other relevant evidence | Interpretation of the findings within the context of the previous literature is reported in paragraph 2 of the discussion, see page 6. |
| Generalisability         | 21 | Discuss the generalisability (external validity) of the study results                                                                                                      |                                                                                                                                        |
| <b>Other information</b> |    |                                                                                                                                                                            |                                                                                                                                        |
| Funding                  | 22 | Give the source of funding and the role of the funders for the present study and, if applicable, for the original study on which the present article is based              | No funding was sought for this study.                                                                                                  |

\*Give information separately for exposed and unexposed groups.

**Note:** An Explanation and Elaboration article discusses each checklist item and gives methodological background and published examples of transparent reporting. The STROBE checklist is best used in conjunction with this article (freely available on the Web sites of PLoS Medicine at <http://www.plosmedicine.org/>, Annals of Internal Medicine at <http://www.annals.org/>, and Epidemiology at <http://www.epidem.com/>). Information on the STROBE Initiative is available at [www.strobe-statement.org](http://www.strobe-statement.org).
